# Supplementary material for: Quantitative Control of Early Flowering in White Lupin (Lupinus albus L.)
Source: Int J Mol Sci. 2021 Apr 8;22(8):3856. doi: 10.3390/ijms22083856 (PMC8068107; doi:10.3390/ijms22083856)
Supplement: Supplementary file 1 [file ijms-22-03856-s001.xlsx]

## Sheet: TableS1
Quantitative control of early flowering in white lupin (Lupinus albus L.)
Sandra Rychel-Bielska, Anna Surma, Wojciech Bielski, Bartosz Kozak, Renata Galek, and Michał Książkiewicz
Supplementary Table S1. White lupin lines used in the study.
Accession	Country	Name	Domestication status	Donor	Group
95406	POL	R-933	cross derivative	Przebędowo,Mikołajczyk	V4
95424	POL	Kali x Laju Biały-1	cross derivative	Wiatrowo,Święcicki	V4
95427	ESP	Sel.ecot. x LA-109/1	cross derivative	Salamanca,Jambrina	V4
95440	POL	HetmanxStart	cross derivative	Wiatrowo,Święcicki	V4
95442	POL	Mutant SelfCompleting x Nahrq.	cross derivative	Wiatrowo,Święcicki	V5
95470	POL	R6902 x El Harrach 2	cross derivative	Wiatrowo	V4
95237	POL	L. graecus x Mut.Topless x Hetman F	cross derivative	Wiatrowo	V4
95414	BYS	Bialorus-1	cross derivative	Zodino,Bowtramowicz	V5
95415	BYS	Bialorus-2	cross derivative	-	V5
95416	BYS	Bialorus-3	cross derivative	Zodino, Bowtramowicz	V5
95404	POL	R-6020	cross derivative	Wiatrowo,Michalski	V3
95418	BYS	Bialorus-5	cross derivative	-	V4
95276	PRT	Siebacher Red BGR 6321	cultivar	Bułgaria	V2
95409	DEU	Neutra	cultivar	Gatersleben,Lehmann	V5
95422	SUN	Start	cultivar	-	V4
95428	DEU	Pflugs Gela	cultivar	Gatersleben,Lehmann	V6
95479	SUN	Kijewskij Mutant	cultivar	Cowling	V5
95480	HUN	Nelly	cultivar	Cowling	V5
95513	POL	Butan	cultivar	Przebędowo	V5
95482	POL	Pikador	cultivar	SHR Wiatrowo	V5
95530	POL	Boros	cultivar	HR Smolice	V5
95419	POL	Kalina	cultivar	Przebędowo,Mikołajczyk	V2
95403	POL	Wat	cultivar	Wiatrowo,Święcicki	V4
95481	POL	Bardo	cultivar	IHAR Przebędowo	V4
95476	FRA	Athos	cultivar	Lusignac	V4
95434	SUN	Lotos	cultivar	Bot.Garden,Powsin	V4
95510	DEU	Hansa (95510)	cultivar	Gatersleben	V5
95275	ISR	BGR6305	cultivar	Bułgaria	V3
95431	DEU	Volodia	cultivar	Gatersleben,Lehmann	V5
95432	SUN	Primorskij	cultivar	Bot.Garden, Powsin	V5
95433	SUN	Dniepr	cultivar	Bot.Garden,Powsin	V4
95439	SUN	Silosnyj	cultivar	Zodino,Łukaszewicz	V4
95443	FRA	Lublanc	cultivar	Lusignan,Hugue	V4
95456	SUN	Horizont	cultivar	University of Minnesota	V3
95405	POL	Kali	cultivar	Przebędowo,Mikołajczyk	V4
95423	CHL	Amiga	cultivar	Temuco,Von Baer	V4
95430	DEU	Rimpaus Friihe Siisse Weisslup	cultivar	Gatersleben,Lehmann	V4
95445	FRA	Lutrop	cultivar	Braunschweig,Seidewitz	V5
95449	ZAF	Buttercup	cultivar	Pretoria,v.d.May	V5
95452	POL	WTD-286	cultivar	Wiatrowo,Święcicki	V3
95454	SUN	Tombowskij Skorospielyj	cultivar	Leningrad,Kurlowicz	V5
95509	DEU	Nahrquell	cultivar	Gatersleben	V4
95413	UKR	Kiev Mutant	cultivar	Cowling	V5
95113	FRA	LA-108	landrace	Salamanca,Jambrina	V2
95114	FRA	LA-109	landrace	Salamanca,Jambrina	V2
95130	ESP	Population-84152	landrace	Salamanca,Jambrina	V2
95132	PRT	Tremoco Gorzki	landrace	Gatersleben,Lehmann	V2
95146	ESP	AL-19	landrace	Salamanca,Jambrina	V5
95149	ESP	AL-22	landrace	Salamanca,Jambrina	V5
95151	ESP	AL-26	landrace	Salamanca,Jambrina	V2
95152	ESP	AL-27	landrace	Salamanca,Jambrina	V4
95155	ESP	R-32	landrace	Salamanca,Jambrina	V4
95211	ISR	Turmus balady gadim,Druze L.R.	landrace	University of Minnesota	V2
95212	JOR	Turmus b. g. L.R.M.-2738	landrace	University of Minnesota	V2
95213	JOR	Turmus balady L.R.M.-2675	landrace	University of Minnesota	V2
95219	EGY	Giza-2	landrace	University of Minnesota	V5
95234	CHL	P.21525	landrace	-	V3
95407	PRT	Tremoco Doce	landrace	Oeiras,Mota	V6
95468	BYS	Azurnyj	landrace	Święcicki	V4
95036	ESP	Population-8011	landrace	Salamanca,Jambrina	V6
95163	ESP	SF-387	landrace	Salamanca,Jambrina	V5
95084	DZA	El Harrach-1	landrace	El Harrach	V4
95145	ESP	AL-18	landrace	Salamanca,Jambrina	V2
95147	ESP	AL-20	landrace	Salamanca,Jambrina	V4
95097	PRT	Tremoco	landrace	Gatersleben,Lehmann	V4
95153	ESP	AL-28	landrace	Salamanca,Jambrina	V2
95175	ESP	R-84141	landrace	Salamanca,Jambrina	V4
95148	ESP	AL-21	landrace	Salamanca,Jambrina	V2
95157	ESP	R-114	landrace	Salamanca,Jambrina	V2
95103	ESP	LA-20	landrace	Salamanca,Jambrina	V6
95085	DZA	El Harrach-2	landrace	El Harrach	V4
95086	DZA	El Harrach-3	landrace	El Harrach	V3
95087	DZA	El Harrach-4	landrace	El Harrach	V4
95220	TUR	FAM 120	landrace	University of Minnesota	V5
95012	ESP	Magarraz-2	landrace	Salamanca,Jambrina	V2
95062	ESP	Population-8057	landrace	Salamanca,Jambrina	V4
95160	ESP	R-243	landrace	Salamanca,Jambrina	V4
95166	ESP	SF-479	landrace	Salamanca,Jambrina	V5
95176	POL	WTD 6020	landrace	Wiatrowo,Święcicki	V4
95523	TUR	FRA6708B	wild or primitive /landrace*	Jon Clements (AUS 27665)	V6
95524	TUR	FRA6712B	wild or primitive /landrace*	Jon Clements (AUS 27669)	V6
95516	ESP	MJS208-2	wild or primitive /landrace*	Jon Clements (AUS 25754)	V2
95525	TUR	FRA6713B	wild or primitive /landrace*	Jon Clements (AUS 27670)	V6
95528	EGY	LA384	wild or primitive /landrace*	Jon Clements (AUS 28266)	V4
95515	ESP	MJS208-1	wild or primitive /landrace*	Jon Clements (AUS 25753)	V6
95526	FRA	LA359	wild or primitive /landrace*	Jon Clements (AUS 28256)	V4
95517	SYR	Damascus	wild or primitive /landrace*	Jon Clements (AUS 26791)	V2
95527	EGY	LA382	wild or primitive /landrace*	Jon Clements (AUS 28264)	V4
95522	TUR	FRA6706B	wild or primitive /landrace*	Jon Clements (AUS 27663)	V2
95529	SDN	LA423	wild or primitive /landrace*	Jon Clements (AUS 28287)	V6
95518	ETH	ILCA13665	wild or primitive /landrace*	Jon Clements (AUS 27172)	V4
95520	ETH	ILCA13674	wild or primitive /landrace*	Jon Clements (AUS 27175)	V2
95521	ETH	ILCA13677	wild or primitive /landrace*	Jon Clements (AUS 27178)	V1
95519	ETH	P27174	wild or primitive /landrace*	Jon Clements (AUS 27174)	V1
95177	POL	Mutant Self Completing	mutant	Wiatrowo,Święcicki	V4
95144	ESP	M.Mut.z Hiszp.(topless)	mutant	Święcicki	V4
95116	ESP	Mutant cienkoscienny	mutant	Salamanca,Jambrina	V2
95244	DZA	Pop. 2027	wild or primitive	Gatersleben	V6
95109	ESP	Population-84003	wild or primitive	Salamanca,Jambrina	V4
95007	ESP	Mansilla de los Mulas	wild or primitive	Salamanca,Jambrina	V3
95223	TUR	TR-5	wild or primitive	-	V6
95101	ITA	Calabria	wild or primitive	Palermo	V4
95187	ITA	BGRC-3911	wild or primitive	Braunschweig,Seidewitz	V4
95133	ETH	VIR Leningr.-490	wild or primitive	Gatersleben,Lehmann	V3
95230	USA	L.46-10	wild or primitive	VIR 3230	V5
95197	ITA	BGRC-3921	wild or primitive	Braunschweig,Seidewitz	V4
95246	ETH	Pop.2078	wild or primitive	Gatersleben	V2
95255	EGY	Egipt-8	wild or primitive	BRGC	V3
95215	SYR	ICARDA,IFLUE-33	wild or primitive	University of Minnesota	V3
95216	ZAF	L-229-N	wild or primitive	University of Minnesota	V5
95254	EGY	Egipt-7	wild or primitive	BRGC	V1
95269	ISR	BG-9787	wild or primitive	Madryt	V3
95076	ESP	Population B-296/76	wild or primitive	Gatersleben,Lehmann	V4
95245	GBR	Lupini Bean	wild or primitive	Gatersleben	V2
95077	ESP	Population B-297/79	wild or primitive	Gatersleben,Lehmann	V5
95602	GRC	Population-775	wild or primitive	Simpson	V4
95243	DZA	Pop.2023	wild or primitive	Gatersleben	V2
95231	SYR	Pop.z Syrii	wild or primitive	Opole	V6
95125	GRC	Population-877	wild or primitive	Simpson	V5
95038	ESP	Population-8018	wild or primitive	Salamanca,Jambrina	V4
95143	ESP	Population-199	wild or primitive	Sevilla,Martin	V3
95080	ESP	Population B-2007/80	wild or primitive	Gatersleben,Lehmann	V2
95015	ESP	San Felices	wild or primitive	-	V5
95266	PRT	Pop.Setubal	wild or primitive	Madryt	V3
95023	PRT	Oeiras-930/3	wild or primitive	Oeiras,Mota	V5
95048	ESP	Population-8031	wild or primitive	Salamanca,Jambrina	V6
95253	EGY	Egipt-5	wild or primitive	BRGC	V3
95049	ESP	Population-8032	wild or primitive	Salamanca,Jambrina	V1
95095	PRT	Azorski	wild or primitive	Gatersleben,Lehmann	V4
95128	ESP	Population-84075	wild or primitive	Salamanca,Jambrina	V3
95075	ESP	Population B-295/79	wild or primitive	Gatersleben,Lehmann	V4
95138	ESP	Population-187	wild or primitive	Sevilla,Martin	V4
95047	ESP	Population-8030	wild or primitive	Salamanca,Jambrina	V6
95040	ESP	Population-8020	wild or primitive	Salamanca,Jambrina	V1
95264	PRT	Tremoco Beja	wild or primitive	Madryt	V3
95124	GRC	Population-780	wild or primitive	Simpson	V5
95064	ESP	Population-8062	wild or primitive	Salamanca,Jambrina	V2
95034	ESP	Population-8009	wild or primitive	Salamanca,Jambrina	V3
95257	ETH	Pop.52892	wild or primitive	BRGC	V3
95267	ESP	Lobbi Barcelona	wild or primitive	Madryt	V2
95059	ESP	Population-8053	wild or primitive	Salamanca,Jambrina	V2
95239	ESP	Altramuz Chocho1	wild or primitive	Gatersleben	V3
95078	ESP	Population B-300/79	wild or primitive	Gatersleben,Lehmann	V4
95185	ITA	BGRC-3909	wild or primitive	Braunschweig,Seidewitz	V4
95214	SYR	ICARDA,IFLU-29	wild or primitive	University of Minnesota	V4
95041	ESP	Population-8021	wild or primitive	Salamanca,Jambrina	V6
95102	ESP	LA-31 San Felices	wild or primitive	Salamanca,Jambrina	V5
95054	ESP	Population-8039	wild or primitive	Salamanca,Jambrina	V4
95071	ESP	Population B-266/79	wild or primitive	Gatersleben,Lehmann	V2
95606	GRC	Population-776	wild or primitive	Simpson	V2
95203	SYR	Populacja z Syrii	wild or primitive	Święcicki	V5
95042	ESP	Population-8022	wild or primitive	Salamanca,Jambrina	V6
95252	ISR	Pop.2579B	wild or primitive	Bet Dagan	V4
95035	ESP	Population-8010	wild or primitive	Salamanca,Jambrina	V6
95033	ESP	Population-8006	wild or primitive	Salamanca,Jambrina	V6
95251	ISR	Pop.2579	wild or primitive	Bet Dagan	V2
95108	ESP	Population-84002	wild or primitive	Salamanca,Jambrina	V3
95072	ESP	Population B-267/79	wild or primitive	Gatersleben,Lehmann	V2
95609	GRC	P.26780	wild or primitive	Cowling	V2
95605	GRC	Population-743	wild or primitive	Simpson	V4
			* the second term refers to the annotation in Australian germplasm collection

## Sheet: TableS2
Quantitative control of early flowering in white lupin (Lupinus albus L.)
Sandra Rychel-Bielska, Anna Surma, Wojciech Bielski, Bartosz Kozak, Renata Galek, and Michał Książkiewicz
Supplementary Table S2. Number of days from sowing to flowering observed for white lupin lines used in the study.
Accession	Name	2020 non-vernalized										2018 vernalized										2018 non-vernalized										2015 vernalized									2015 non-vernalized
95406	R-933	57	59	59	60	60	60	60	60	60	60	33	33	33	35	35	35	37	37	37	-	39	43	43	43	43	43	43	43	48	48	41	41	42	-	-	-	-	-	-	41	41	44	45	-	-	-	-	-
95424	Kali x Laju Biały-1	48	48	48	48	50	53	53	55	62	-	33	33	33	33	33	33	33	33	33	33	39	39	39	39	39	39	39	39	39	43	40	40	41	41	-	-	-	-	-	43	42	42	42	42	42	-	-	-
95427	Sel.ecot. x LA-109/1	56	56	56	56	56	57	57	57	57	57	40	40	40	40	40	40	40	40	40	44	43	43	43	43	43	43	43	43	43	46	45	45	47	47	-	-	-	-	-	50	50	50	48	-	-	-	-	-
95440	HetmanxStart	53	53	53	53	53	53	57	57	57	57	35	35	35	35	35	35	37	37	37	-	39	43	43	43	43	43	43	43	43	-	41	41	42	42	41	-	-	-	-	42	42	42	42	-	-	-	-	-
95442	Mutant SelfCompleting x Nahrq.	62	69	71	71	74	74	74	74	-	-	40	40	40	40	44	44	44	44	44	49	39	48	53	53	53	53	53	55	57	57	45	45	45	45	47	-	-	-	-	45	45	47	52	52	-	-	-	-
95470	R6902 x El Harrach 2	53	59	69	69	69	71	71	74	74	74	40	40	40	40	44	44	44	44	44	44	43	53	53	53	55	55	55	55	57	63	45	45	45	45	45	-	-	-	-	45	45	52	54	57	-	-	-	-
95237	L. graecus x Mut.Topless x Hetman F	53	53	54	54	54	55	61	69	74	78	37	37	40	40	40	40	40	40	44	44	43	43	43	43	43	43	45	-	-	-	38	40	42	47	49	-	-	-	-	45	45	45	52	61	-	-	-	-
95414	Bialorus-1	60	63	63	71	76	51	51	51	53	54	35	35	37	40	40	40	40	40	40	-	39	39	39	43	43	48	48	-	-	-	-	-	-	-	-	-	-	-	-	-	-	-	-	-	-	-	-	-
95415	Bialorus-2	52	53	54	54	58	58	-	-	-	-	37	44	44	-	-	-	-	-	-	-	46	46	46	-	-	-	-	-	-	-	-	-	-	-	-	-	-	-	-	-	-	-	-	-	-	-	-	-
95416	Bialorus-3	48	48	50	53	53	53	53	54	57	69	35	35	35	35	35	40	40	40	40	40	43	50	55	55	55	55	60	60	-	-	-	-	-	-	-	-	-	-	-	-	-	-	-	-	-	-	-	-
95404	R-6020	50	55	55	55	60	62	62	64	64	67	-	-	-	-	-	-	-	-	-	-	-	-	-	-	-	-	-	-	-	-	-	-	-	-	-	-	-	-	-	-	-	-	-	-	-	-	-	-
95418	Bialorus-5	53	51	51	53	52	52	52	-	-	-	-	-	-	-	-	-	-	-	-	-	-	-	-	-	-	-	-	-	-	-	-	-	-	-	-	-	-	-	-	-	-	-	-	-	-	-	-	-
95276	Siebacher Red BGR 6321	47	60	60	64	67	67	67	69	74	76	33	37	37	37	40	40	40	40	40	40	43	43	57	57	60	60	63	63	63	63	47	47	47	47	-	-	-	-	-	47	54	54	57	57	-	-	-	-
95409	Neutra	65	65	65	67	69	69	69	76	-	-	33	33	33	33	33	33	33	33	33	33	43	43	43	43	43	43	43	46	46	46	47	52	41	44	-	-	-	-	-	50	50	50	50	61	-	-	-	-
95422	Start	48	47	50	53	53	57	57	57	-	-	35	35	35	37	37	37	37	40	40	-	39	39	39	39	39	43	43	-	-	-	40	41	41	-	-	-	-	-	-	41	41	41	42	-	-	-	-	-
95428	Pflugs Gela	59	59	60	60	60	60	60	61	61	61	33	33	33	33	33	37	40	40	40	40	39	39	39	43	43	43	43	43	48	48	42	43	43	-	-	-	-	-	-	44	44	45	45	-	-	-	-	-
95479	Kijewskij Mutant	54	54	56	56	56	56	56	57	57	57	33	33	33	33	33	33	33	33	33	33	43	43	43	43	43	43	43	43	43	43	38	38	38	39	39	-	-	-	-	43	43	44	45	45	-	-	-	-
95480	Nelly	50	53	53	53	53	53	53	53	56	57	33	33	35	37	37	40	40	40	40	40	39	39	39	39	43	43	43	43	43	43	45	45	49	-	-	-	-	-	-	47	47	47	43	45	50	-	-	-
95513	Butan	43	46	49	50	51	51	53	53	53	53	35	35	35	35	35	37	37	40	40	-	39	39	39	39	39	39	-	-	-	-	40	40	41	-	-	-	-	-	-	41	42	42	42	-	-	-	-	-
95482	Pikador	48	50	51	53	53	53	53	53	56	56	33	33	33	33	33	35	37	37	37	37	39	39	39	39	39	39	39	39	39	43	42	42	43	-	-	-	-	-	-	50	50	47	50	-	-	-	-	-
95530	Boros	46	48	50	50	50	50	53	53	53	53	33	33	33	33	33	35	35	35	35	35	39	39	39	39	39	39	39	39	-	-	41	41	41	-	-	-	-	-	-	41	44	44	45	-	-	-	-	-
95419	Kalina	53	53	55	56	61	61	67	67	67	-	33	33	33	33	33	33	33	33	33	33	39	39	39	43	43	43	43	-	-	-	45	59	42	42	42	42	-	-	-	43	47	47	50	50	50	-	-	-
95403	Wat	50	50	50	53	53	53	53	53	53	53	35	35	35	35	35	35	37	37	40	44	39	39	39	39	43	43	46	46	46	46	40	42	43	43	-	-	-	-	-	47	50	47	49	-	-	-	-	-
95481	Bardo	54	54	54	55	55	55	55	55	56	56	35	35	35	35	37	37	37	37	40	40	39	39	39	43	43	43	43	43	43	-	40	42	42	42	42	-	-	-	-	47	47	47	47	50	-	-	-	-
95476	Athos	62	81	81	71	83	89	89	-	-	-	44	61	79	-	-	-	-	-	-	-	53	55	67	69	74	74	74	-	-	-	40	49	49	52	-	-	-	-	-	57	75	78	85	-	-	-	-	-
95434	Lotos	43	46	50	50	53	53	53	53	53	54	33	35	35	35	37	37	37	40	40	40	39	39	39	39	39	39	39	39	48	-	41	42	42	-	-	-	-	-	-	42	42	44	45	-	-	-	-	-
95510	Hansa (95510)	54	54	54	54	54	54	54	54	54	54	37	37	37	37	40	40	40	40	40	40	39	39	39	39	43	-	-	-	-	-	40	42	42	-	-	-	-	-	-	42	42	44	44	44	-	-	-	-
95275	BGR6305	58	67	49	51	52	53	53	54	55	57	35	35	35	35	35	37	37	40	40	40	39	39	43	48	48	48	53	53	-	-	-	-	-	-	-	-	-	-	-	-	-	-	-	-	-	-	-	-
95431	Volodia	64	54	54	54	55	55	57	58	59	59	35	35	35	35	35	40	40	-	-	-	43	43	43	43	43	48	48	48	-	-	-	-	-	-	-	-	-	-	-	-	-	-	-	-	-	-	-	-
95432	Primorskij	48	55	60	60	60	-	-	-	-	-	35	35	35	40	40	40	40	40	-	-	39	39	43	43	43	43	48	48	-	-	-	-	-	-	-	-	-	-	-	-	-	-	-	-	-	-	-	-
95433	Dniepr	52	52	52	52	52	52	53	53	53	53	37	37	37	37	49	-	-	-	-	-	39	39	39	39	39	48	48	48	-	-	-	-	-	-	-	-	-	-	-	-	-	-	-	-	-	-	-	-
95439	Silosnyj	46	46	53	53	49	52	53	53	55	57	35	35	35	37	37	37	37	40	40	40	39	39	39	39	39	39	39	48	-	-	-	-	-	-	-	-	-	-	-	-	-	-	-	-	-	-	-	-
95443	Lublanc	55	55	57	61	60	60	60	60	60	60	40	40	40	44	44	44	44	-	-	-	53	53	53	59	-	-	-	-	-	-	-	-	-	-	-	-	-	-	-	-	-	-	-	-	-	-	-	-
95456	Horizont	60	64	67	67	-	-	-	-	-	-	40	40	40	40	40	40	40	40	49	49	43	43	43	48	50	60	60	60	-	-	-	-	-	-	-	-	-	-	-	-	-	-	-	-	-	-	-	-
95405	Kali	43	50	53	55	-	-	-	-	-	-	-	-	-	-	-	-	-	-	-	-	-	-	-	-	-	-	-	-	-	-	-	-	-	-	-	-	-	-	-	-	-	-	-	-	-	-	-	-
95423	Amiga	51	54	54	64	62	62	64	64	67	67	-	-	-	-	-	-	-	-	-	-	-	-	-	-	-	-	-	-	-	-	-	-	-	-	-	-	-	-	-	-	-	-	-	-	-	-	-	-
95430	Rimpaus Friihe Siisse Weisslup	53	53	52	51	52	52	53	55	57	60	-	-	-	-	-	-	-	-	-	-	-	-	-	-	-	-	-	-	-	-	-	-	-	-	-	-	-	-	-	-	-	-	-	-	-	-	-	-
95445	Lutrop	53	53	53	55	55	55	55	55	57	57	-	-	-	-	-	-	-	-	-	-	-	-	-	-	-	-	-	-	-	-	-	-	-	-	-	-	-	-	-	-	-	-	-	-	-	-	-	-
95449	Buttercup	58	58	58	60	60	-	-	-	-	-	-	-	-	-	-	-	-	-	-	-	-	-	-	-	-	-	-	-	-	-	-	-	-	-	-	-	-	-	-	-	-	-	-	-	-	-	-	-
95452	WTD-286	53	53	53	53	55	56	57	61	62	-	-	-	-	-	-	-	-	-	-	-	-	-	-	-	-	-	-	-	-	-	-	-	-	-	-	-	-	-	-	-	-	-	-	-	-	-	-	-
95454	Tombowskij Skorospielyj	51	51	51	51	52	52	53	53	53	53	-	-	-	-	-	-	-	-	-	-	-	-	-	-	-	-	-	-	-	-	-	-	-	-	-	-	-	-	-	-	-	-	-	-	-	-	-	-
95509	Nahrquell	43	44	47	50	50	50	50	53	53	53	-	-	-	-	-	-	-	-	-	-	-	-	-	-	-	-	-	-	-	-	-	-	-	-	-	-	-	-	-	71	71	96	-	-	-	-	-	-
95413	Kiev Mutant	55	55	55	55	55	55	55	56	56	56	35	35	35	37	37	37	37	37	40	40	43	43	43	43	43	43	43	43	48	50	38	38	38	38	39	39	40	-	-	43	45	45	45	45	-	-	-	-
95113	LA-108	64	67	67	67	69	69	69	71	74	81	37	40	40	40	40	40	40	40	40	40	50	59	59	59	-	-	-	-	-	-	47	47	47	47	59	-	-	-	-	50	50	50	52	52	-	-	-	-
95114	LA-109	53	60	64	64	68	71	71	-	-	-	35	40	40	40	40	40	40	40	40	40	39	43	46	46	46	48	48	48	48	55	45	45	45	47	47	-	-	-	-	52	52	52	54	53	-	-	-	-
95130	Population-84152	53	62	62	63	67	67	71	77	-	-	33	33	35	35	40	40	40	40	40	40	43	50	55	55	55	55	55	55	57	57	40	47	47	52	52	-	-	-	-	50	54	54	59	61	59	59	-
95132	Tremoco Gorzki	62	71	74	74	77	-	-	-	-	-	35	35	37	40	40	40	40	40	40	49	55	55	63	67	67	67	-	-	-	-	45	45	47	66	-	-	-	-	-	57	57	59	59	61	51	59	-	-
95146	AL-19	55	55	62	67	67	74	74	74	74	75	37	37	37	40	40	40	40	40	40	40	46	53	53	55	55	60	67	67	67	67	42	42	47	47	47	-	-	-	-	47	52	52	57	61	58	71	71	-
95149	AL-22	62	64	64	69	69	69	69	74	74	74	35	37	37	37	37	37	37	-	-	-	53	53	55	57	-	-	-	-	-	-	40	42	45	45	45	45	45	45	-	52	52	52	57	57	54	54	64	-
95151	AL-26	60	60	64	64	64	67	69	69	71	71	37	37	37	37	37	37	37	37	37	37	53	53	53	55	57	57	63	63	65	-	42	42	42	47	45	45	45	47	-	54	57	57	57	57	52	57	61	68
95152	AL-27	61	61	62	64	64	64	64	67	67	67	33	33	35	37	37	37	40	40	40	-	48	53	53	53	53	53	55	55	60	63	42	42	56	-	-	-	-	-	-	54	54	57	50	50	53	60	-	-
95155	R-32	67	69	71	71	71	74	74	76	76	76	37	37	40	40	40	40	40	40	40	40	48	50	50	50	50	50	50	50	50	50	42	42	45	45	54	-	-	-	-	54	57	57	59	-	-	-	-	-
95211	Turmus balady gadim,Druze L.R.	72	72	74	74	74	74	76	-	-	-	35	37	40	40	40	40	40	40	40	-	43	55	60	60	60	60	63	67	67	67	49	59	53	53	53	-	-	-	-	57	57	57	57	57	-	-	-	-
95212	Turmus b. g. L.R.M.-2738	91	88	91	88	-	-	-	-	-	-	37	37	37	37	37	40	40	40	40	40	78	80	82	-	-	-	-	-	-	-	45	52	52	52	-	-	-	-	-	61	66	78	85	92	-	-	-	-
95213	Turmus balady L.R.M.-2675	71	72	74	74	-	-	-	-	-	-	37	37	37	40	40	40	40	-	-	-	60	60	60	60	60	60	-	-	-	-	41	41	41	-	-	-	-	-	-	44	44	44	44	44	-	-	-	-
95219	Giza-2	56	57	60	60	71	74	78	83	83	-	33	33	35	35	35	37	37	37	40	40	43	43	43	43	43	43	46	46	53	53	38	52	39	44	46	-	-	-	-	47	47	47	52	52	-	-	-	-
95234	P.21525	50	50	53	53	55	55	56	-	-	-	33	33	33	33	33	33	33	33	-	-	39	39	43	43	43	43	43	46	46	46	40	40	42	42	47	-	-	-	-	45	47	50	44	-	-	-	-	-
95407	Tremoco Doce	60	60	60	62	64	64	64	71	71	74	33	33	33	35	35	35	35	35	35	35	43	43	43	48	48	48	50	50	57	57	40	40	40	45	47	-	-	-	-	50	52	54	57	59	-	-	-	-
95468	Azurnyj	57	57	60	60	60	60	60	60	60	60	37	37	37	37	37	40	40	40	40	44	43	43	43	43	43	48	48	-	-	-	47	47	49	49	59	-	-	-	-	50	54	45	45	47	-	-	-	-
95036	Population-8011	71	71	76	76	76	78	83	83	83	83	37	40	40	40	40	40	40	44	44	44	60	60	60	60	60	60	63	67	67	67	42	47	47	47	47	-	-	-	-	57	57	59	59	-	-	-	-	-
95163	SF-387	60	60	60	62	62	62	62	64	67	67	37	40	40	40	40	40	40	40	40	49	50	50	53	53	53	53	57	63	63	-	42	47	52	59	-	-	-	-	-	50	50	52	66	73	-	-	-	-
95084	El Harrach-1	53	57	57	60	60	60	60	62	64	64	35	35	35	35	35	35	37	37	37	37	39	43	43	43	43	48	53	53	53	53	38	38	40	42	49	-	-	-	-	47	50	50	54	59	-	-	-	-
95145	AL-18	64	65	67	67	67	67	74	81	81	81	37	37	37	40	40	40	40	40	40	44	57	57	57	57	57	63	63	63	69	-	40	42	45	49	49	-	-	-	-	50	57	57	64	-	-	-	-	-
95147	AL-20	60	67	69	69	69	69	69	69	71	71	37	37	40	40	40	40	40	40	40	40	48	48	48	48	53	53	53	53	53	55	45	45	45	47	52	-	-	-	-	52	52	52	52	57	-	-	-	-
95097	Tremoco	63	63	64	64	67	67	67	67	67	70	40	40	40	40	40	40	40	40	40	47	48	48	50	50	50	50	63	53	53	53	45	49	52	52	-	-	-	-	-	50	50	50	52	57	-	-	-	-
95153	AL-28	67	67	67	67	71	74	74	74	74	74	37	37	37	37	40	40	40	40	40	-	57	57	57	60	60	63	69	69	69	69	49	52	52	56	-	-	-	-	-	57	57	57	57	57	-	-	-	-
95175	R-84141	69	69	69	71	71	74	74	74	74	74	40	40	40	40	40	40	40	40	40	40	48	48	48	55	55	55	55	55	63	63	40	45	47	52	52	-	-	-	-	52	52	52	52	-	-	-	-	-
95148	AL-21	75	76	76	78	78	-	-	-	-	-	40	40	44	44	44	44	44	44	44	44	67	67	67	67	69	69	-	-	-	-	52	52	59	-	-	-	-	-	-	66	66	66	68	71	-	-	-	-
95157	R-114	74	78	81	81	81	83	83	92	-	-	40	40	44	44	44	49	49	51	56	56	90	90	90	90	90	90	-	-	-	-	52	52	52	52	56	-	-	-	-	75	82	92	92	-	-	-	-	-
95103	LA-20	60	64	71	71	74	74	74	74	74	74	40	40	40	40	40	40	40	40	44	44	60	60	60	60	60	63	63	67	67	67	45	45	45	45	52	-	-	-	-	52	52	57	-	-	-	-	-	-
95085	El Harrach-2	53	51	51	51	51	53	53	62	64	64	37	37	40	40	40	40	-	-	-	-	39	39	43	43	48	53	-	-	-	-	-	-	-	-	-	-	-	-	-	-	-	-	-	-	-	-	-	-
95086	El Harrach-3	64	64	64	67	68	69	69	71	71	71	40	40	40	40	40	40	40	40	-	-	53	60	60	60	60	63	-	-	-	-	-	-	-	-	-	-	-	-	-	-	-	-	-	-	-	-	-	-
95087	El Harrach-4	71	71	71	76	78	53	55	64	64	67	40	40	40	40	40	40	-	-	-	-	43	48	48	63	63	-	-	-	-	-	-	-	-	-	-	-	-	-	-	-	-	-	-	-	-	-	-	-
95220	FAM 120	53	53	55	55	55	60	60	60	64	64	33	35	35	35	35	37	37	37	37	37	39	39	43	43	43	48	48	48	-	-	-	-	-	-	-	-	-	-	-	-	-	-	-	-	-	-	-	-
95012	Magarraz-2	62	64	67	67	69	74	76	76	78	89	-	-	-	-	-	-	-	-	-	-	-	-	-	-	-	-	-	-	-	-	-	-	-	-	-	-	-	-	-	-	-	-	-	-	-	-	-	-
95062	Population-8057	48	53	60	64	64	67	67	74	74	-	-	-	-	-	-	-	-	-	-	-	-	-	-	-	-	-	-	-	-	-	-	-	-	-	-	-	-	-	-	-	-	-	-	-	-	-	-	-
95160	R-243	53	55	55	55	55	60	51	51	51	57	-	-	-	-	-	-	-	-	-	-	-	-	-	-	-	-	-	-	-	-	-	-	-	-	-	-	-	-	-	-	-	-	-	-	-	-	-	-
95166	SF-479	60	60	60	60	62	62	64	71	74	-	-	-	-	-	-	-	-	-	-	-	-	-	-	-	-	-	-	-	-	-	-	-	-	-	-	-	-	-	-	-	-	-	-	-	-	-	-	-
95176	WTD 6020	53	53	53	53	54	54	55	55	57	60	-	-	-	-	-	-	-	-	-	-	-	-	-	-	-	-	-	-	-	-	-	-	-	-	-	-	-	-	-	-	-	-	-	-	-	-	-	-
95177	Mutant Self Completing	64	64	64	67	67	67	67	67	69	69	35	35	35	37	37	37	37	40	40	40	43	43	43	43	43	43	43	43	43	46	45	45	45	45	-	-	-	-	-	50	50	50	50	-	-	-	-	-
95144	M.Mut.z Hiszp.(topless)	60	62	63	67	67	74	76	76	81	81	40	40	40	40	40	40	40	40	40	44	48	53	55	57	57	60	60	60	60	60	42	42	45	52	-	-	-	-	-	52	54	61	68	-	-	-	-	-
95116	Mutant cienkoscienny	76	86	86	86	87	87	89	89	89	89	40	40	40	40	40	40	40	40	40	44	74	78	83	-	-	-	-	-	-	-	47	47	52	54	-	-	-	-	-	78	92	92	85	85	-	-	-	-
95523	FRA6708B	44	46	46	46	46	47	50	50	50	-	33	35	35	35	35	35	37	37	37	37	34	34	36	36	36	39	39	39	41	-	37	37	38	38	-	-	-	-	-	37	38	38	38	-	-	-	-	-
95524	FRA6712B	44	46	46	47	48	48	50	50	50	50	33	33	33	33	33	35	35	35	35	35	36	36	39	39	39	39	39	39	39	39	37	37	38	38	39	-	-	-	-	45	37	37	37	39	-	-	-	-
95516	MJS208-2	47	47	49	49	-	-	-	-	-	-	37	40	40	44	-	-	-	-	-	-	43	48	50	-	-	-	-	-	-	-	45	45	45	47	-	-	-	-	-	50	50	50	50	50	-	-	-	-
95525	FRA6713B	46	50	50	50	50	50	-	-	-	-	33	33	33	35	37	40	40	47	47	-	36	36	39	39	39	39	39	39	39	39	37	37	37	42	45	52	-	-	-	40	37	37	44	54	37	37	-	-
95528	LA384	44	44	50	53	53	53	53	53	53	53	33	35	35	35	37	37	37	37	37	37	36	39	39	39	39	39	39	39	43	43	40	40	40	42	-	-	-	-	-	43	43	43	44	44	-	-	-	-
95244	Pop. 2027	46	46	48	50	50	53	53	53	54	60	33	33	33	33	33	33	33	33	35	40	39	46	46	48	48	57	57	57	60	60	42	52	40	39	44	53	53	-	-	40	40	47	50	57	-	-	-	-
95109	Population-84003	48	48	48	50	51	51	53	53	61	61	37	37	37	40	40	40	40	40	44	44	41	42	42	46	66	-	-	-	-	-	40	45	45	45	59	47	63	66	73	40	45	57	64	50	50	50	57	68
95007	Mansilla de los Mulas	53	53	53	54	55	55	55	57	47	48	-	-	-	-	-	-	-	-	-	-	-	-	-	-	-	-	-	-	-	-	-	-	-	-	-	-	-	-	-	-	-	-	-	-	-	-	-	-
95223	TR-5	46	48	66	-	-	-	-	-	-	-	37	37	37	37	40	40	40	46	-	-	34	34	43	43	50	50	50	50	53	-	40	40	39	39	39	39	46	-	-	43	43	43	52	54	-	-	-	-
95101	Calabria	51	53	53	53	53	58	-	-	-	-	33	35	35	35	35	35	35	35	37	40	39	39	39	39	39	39	43	43	43	48	40	40	41	-	-	-	-	-	-	41	41	41	41	41	-	-	-	-
95515	MJS208-1	53	53	54	54	-	-	-	-	-	-	37	37	40	40	40	40	51	-	-	-	39	39	39	43	46	46	-	-	-	-	49	47	45	-	-	-	-	-	-	44	44	44	44	-	-	-	-	-
95526	LA359	53	53	53	53	53	55	55	55	55	55	33	33	35	35	35	35	40	40	40	-	39	39	39	39	39	39	39	43	43	48	40	40	40	-	-	-	-	-	-	47	47	47	50	-	-	-	-	-
95517	Damascus	53	53	53	53	53	57	57	57	60	-	40	40	40	40	40	40	40	40	40	-	39	39	39	39	39	48	48	48	-	-	44	44	44	44	47	-	-	-	-	61	42	45	47	51	-	-	-	-
95187	BGRC-3911	53	53	53	55	55	57	58	63	-	-	33	33	33	33	33	33	33	33	33	33	43	43	43	43	43	43	43	43	43	43	40	40	40	40	42	-	-	-	-	43	43	45	47	-	-	-	-	-
95527	LA382	53	53	53	55	55	56	56	60	60	60	33	33	33	33	33	35	35	35	35	37	39	39	43	43	43	43	43	43	48	48	40	42	52	-	-	-	-	-	-	50	50	44	44	-	-	-	-	-
95133	VIR Leningr.-490	57	64	55	51	53	54	57	57	57	57	40	40	40	40	40	40	40	44	-	-	39	39	39	43	43	43	48	-	-	-	-	-	-	-	-	-	-	-	-	-	-	-	-	-	-	-	-	-
95230	L.46-10	53	59	58	60	-	-	-	-	-	-	-	-	-	-	-	-	-	-	-	-	52	52	53	-	-	-	-	-	-	-	-	-	-	-	-	-	-	-	-	-	-	-	-	-	-	-	-	-
95197	BGRC-3921	55	56	60	64	53	55	57	57	60	60	40	40	40	40	40	40	40	40	40	40	39	43	43	48	48	50	-	-	-	-	-	-	-	-	-	-	-	-	-	-	-	-	-	-	-	-	-	-
95246	Pop.2078	53	53	55	55	55	56	60	64	64	64	35	35	40	40	40	40	40	40	40	40	39	39	39	46	48	53	53	53	53	53	42	45	52	54	-	-	-	-	-	47	50	52	54	-	-	-	-	-
95255	Egipt-8	58	59	60	-	-	-	-	-	-	-	40	40	44	-	-	-	-	-	-	-	48	48	48	-	-	-	-	-	-	-	-	-	-	-	-	-	-	-	-	-	-	-	-	-	-	-	-	-
95215	ICARDA,IFLUE-33	53	53	55	64	67	67	56	58	58	60	37	37	37	37	37	40	40	40	-	-	43	43	50	50	50	50	50	50	-	-	-	-	-	-	-	-	-	-	-	-	-	-	-	-	-	-	-	-
95522	FRA6706B	48	53	57	57	57	61	60	67	67	67	33	35	40	40	40	-	-	-	-	-	39	39	39	43	43	43	43	43	48	48	40	40	42	45	42	-	-	-	-	47	47	47	50	45	43	43	-	-
95216	L-229-N	59	59	60	60	60	60	60	60	60	60	33	33	33	35	35	35	37	37	40	40	43	43	43	43	43	43	46	46	-	-	40	41	41	-	-	-	-	-	-	44	49	51	-	-	-	-	-	-
95254	Egipt-7	50	60	60	62	64	64	-	-	-	-	35	35	35	35	40	40	40	40	40	49	48	48	48	50	53	53	53	53	-	-	-	-	-	-	-	-	-	-	-	-	-	-	-	-	-	-	-	-
95269	BG-9787	52	53	51	55	57	64	69	69	72	-	40	40	40	40	44	44	-	-	-	-	48	48	48	50	-	-	-	-	-	-	-	-	-	-	-	-	-	-	-	-	-	-	-	-	-	-	-	-
95076	Population B-296/76	57	57	57	57	60	60	60	62	69	69	33	33	35	35	35	35	35	35	40	40	43	43	43	43	43	53	53	57	57	57	38	38	38	40	45	-	-	-	-	50	50	50	54	54	-	-	-	-
95245	Lupini Bean	56	56	56	60	67	67	67	-	-	-	35	35	37	37	40	40	40	40	40	40	53	53	53	57	57	57	57	57	57	60	45	45	52	52	-	-	-	-	-	52	52	57	57	57	-	-	-	-
95077	Population B-297/79	53	53	53	60	60	60	67	69	69	69	33	33	35	35	35	35	35	35	35	35	43	53	53	53	53	63	63	63	63	-	40	40	40	40	-	-	-	-	-	50	52	54	61	64	49	49	58	63
95602	Population-775	57	60	60	60	60	64	64	64	64	64	33	33	33	33	35	35	37	37	37	37	39	39	43	43	43	43	43	46	50	50	40	40	40	40	40	-	-	-	-	45	45	45	45	-	-	-	-	-
95243	Pop.2023	59	60	60	60	62	62	67	67	67	67	40	40	40	40	40	40	40	40	40	40	46	46	46	46	50	50	50	53	55	55	45	45	45	45	47	-	-	-	-	47	50	50	50	54	-	-	-	-
95231	Pop.z Syrii	53	53	55	60	69	71	76	78	49	68	37	40	40	40	40	44	44	44	-	-	39	41	40	-	-	-	-	-	-	-	-	-	-	-	-	-	-	-	-	-	-	-	-	-	-	-	-	-
95125	Population-877	60	60	60	60	60	62	62	67	69	74	37	37	40	40	40	40	40	40	40	40	48	48	48	48	53	53	53	53	53	55	42	42	42	42	45	-	-	-	-	50	50	50	50	61	-	-	-	-
95038	Population-8018	59	60	62	62	62	62	67	67	67	67	35	35	35	35	35	35	35	35	35	37	48	48	48	48	50	50	53	60	63	65	42	47	47	49	49	52	52	47	52	52	52	54	54	54	50	52	57	57
95529	LA423	59	59	60	60	60	62	69	69	69	69	37	37	40	40	40	40	40	40	41	49	53	55	55	55	60	62	62	-	-	-	42	42	45	45	-	-	-	-	-	50	50	52	54	-	-	-	-	-
95143	Population-199	58	60	62	62	62	64	67	69	69	69	37	37	37	37	40	40	40	40	40	40	48	50	53	53	53	53	53	53	53	53	45	45	45	47	47	-	-	-	-	52	52	52	54	54	59	59	-	-
95518	ILCA13665	60	62	62	62	67	67	67	69	-	-	35	40	40	40	40	40	40	40	44	-	43	43	43	43	48	50	50	50	-	-	-	-	-	-	-	-	-	-	-	-	-	-	-	-	-	-	-	-
95080	Population B-2007/80	60	60	61	61	61	67	69	69	69	71	35	35	35	35	35	35	37	37	37	40	53	53	53	53	53	53	53	57	-	-	42	42	45	45	47	-	-	-	-	50	52	52	59	61	51	51	58	58
95015	San Felices	60	60	60	62	62	67	83	-	-	-	37	37	37	37	40	40	-	-	-	-	46	46	48	48	57	67	69	69	-	-	45	47	49	41	41	44	-	-	-	50	52	64	46	53	-	-	-	-
95266	Pop.Setubal	52	55	55	66	67	69	71	71	74	74	37	40	40	40	40	40	40	44	44	-	43	46	46	50	53	53	63	63	-	-	-	-	-	-	-	-	-	-	-	-	-	-	-	-	-	-	-	-
95023	Oeiras-930/3	57	60	62	62	62	64	69	71	74	76	40	40	44	-	-	-	-	-	-	-	69	70	71	-	-	-	-	-	-	-	-	-	-	-	-	-	-	-	-	-	-	-	-	-	-	-	-	-
95048	Population-8031	60	62	63	64	64	67	67	69	77	-	37	37	37	37	40	40	40	40	40	40	50	53	55	55	55	55	55	67	69	69	45	45	47	47	47	-	-	-	-	50	57	61	64	-	-	-	-	-
95253	Egipt-5	62	64	64	67	67	67	67	67	67	69	35	40	40	40	40	40	44	-	-	-	39	48	48	48	48	50	-	-	-	-	-	-	-	-	-	-	-	-	-	-	-	-	-	-	-	-	-	-
95049	Population-8032	60	61	61	62	62	64	64	76	76	78	37	37	37	37	40	40	40	40	40	40	50	50	53	53	53	53	55	60	60	60	40	42	45	52	-	-	-	-	-	52	57	57	64	-	-	-	-	-
95095	Azorski	58	58	62	64	64	69	69	71	78	81	-	-	-	-	-	-	-	-	-	-	-	-	-	-	-	-	-	-	-	-	-	-	-	-	-	-	-	-	-	-	-	-	-	-	-	-	-	-
95128	Population-84075	62	62	67	67	69	69	76	-	-	-	-	-	-	-	-	-	-	-	-	-	-	-	-	-	-	-	-	-	-	-	-	-	-	-	-	-	-	-	-	-	-	-	-	-	-	-	-	-
95075	Population B-295/79	54	57	60	60	62	67	67	83	83	83	40	40	40	40	40	40	40	40	40	40	39	43	43	60	63	63	63	67	67	67	40	40	45	66	-	-	-	-	-	50	50	57	61	71	-	-	-	-
95520	ILCA13674	68	68	68	-	-	-	-	-	-	-	-	-	-	-	-	-	-	-	-	-	65	67	66	-	-	-	-	-	-	-	-	-	-	-	-	-	-	-	-	-	-	-	-	-	-	-	-	-
95138	Population-187	60	61	64	69	69	69	71	71	74	74	-	-	-	-	-	-	-	-	-	-	-	-	-	-	-	-	-	-	-	-	-	-	-	-	-	-	-	-	-	-	-	-	-	-	-	-	-	-
95047	Population-8030	67	67	67	67	67	69	69	71	71	71	35	35	37	37	37	40	40	40	40	44	48	48	48	53	53	60	63	63	-	-	45	45	45	45	40	40	40	-	-	50	54	57	68	75	52	58	76	-
95040	Population-8020	62	62	62	64	64	71	74	74	74	87	40	40	40	40	40	44	44	44	49	-	48	53	53	53	60	60	60	67	67	67	45	47	49	49	-	-	-	-	-	50	54	64	64	-	-	-	-	-
95264	Tremoco Beja	65	66	67	71	74	63	71	71	71	76	37	37	37	37	37	40	40	40	40	40	50	50	50	53	53	53	53	53	-	-	-	-	-	-	-	-	-	-	-	-	-	-	-	-	-	-	-	-
95124	Population-780	63	63	64	67	71	74	74	74	74	74	40	40	40	40	40	40	40	40	40	40	53	53	53	53	57	60	60	60	63	63	49	49	52	52	63	-	-	-	-	50	54	54	57	57	-	-	-	-
95064	Population-8062	60	60	69	71	74	74	74	74	74	-	35	35	37	37	37	37	40	40	40	40	48	53	53	53	53	57	57	63	67	67	38	42	42	45	47	-	-	-	-	57	57	57	64	68	-	-	-	-
95034	Population-8009	74	64	68	68	69	69	71	71	78	-	40	40	40	40	40	40	40	49	49	-	53	53	53	53	60	60	-	-	-	-	47	47	49	-	-	-	-	-	-	51	57	57	57	60	-	-	-	-
95257	Pop.52892	67	71	72	74	-	-	-	-	-	-	40	40	40	40	40	40	40	44	44	-	48	48	50	53	60	63	-	-	-	-	-	-	-	-	-	-	-	-	-	-	-	-	-	-	-	-	-	-
95267	Lobbi Barcelona	54	69	69	69	74	74	76	76	78	78	35	35	35	40	40	40	40	40	40	40	39	39	48	48	50	50	55	55	57	60	49	49	52	53	53	-	-	-	-	52	57	59	60	-	-	-	-	-
95059	Population-8053	63	69	69	72	74	74	74	74	75	79	37	37	40	40	40	40	40	40	40	44	48	48	50	50	50	50	53	-	-	-	45	45	47	47	-	-	-	-	-	50	50	52	57	71	-	-	-	-
95239	Altramuz Chocho1	67	72	78	-	-	-	-	-	-	-	-	-	-	-	-	-	-	-	-	-	-	-	-	-	-	-	-	-	-	-	-	-	-	-	-	-	-	-	-	-	-	-	-	-	-	-	-	-
95078	Population B-300/79	69	71	71	71	74	74	74	74	74	74	33	33	33	35	35	35	35	35	40	40	53	55	55	60	60	60	63	67	74	74	42	42	42	45	45	-	-	-	-	50	54	57	-	-	-	-	-	-
95185	BGRC-3909	67	71	75	78	-	-	-	-	-	-	37	37	40	40	40	40	40	40	-	-	55	55	60	60	64	-	-	-	-	-	-	-	-	-	-	-	-	-	-	-	-	-	-	-	-	-	-	-
95214	ICARDA,IFLU-29	69	71	71	74	74	74	74	75	-	-	37	37	37	37	40	40	40	40	40	46	43	50	53	62	-	-	-	-	-	-	-	-	-	-	-	-	-	-	-	-	-	-	-	-	-	-	-	-
95041	Population-8021	64	69	71	74	74	74	75	76	76	76	35	40	40	40	40	40	40	40	40	-	53	55	60	60	63	67	67	67	67	69	41	42	42	43	-	-	-	-	-	61	52	57	58	59	-	-	-	-
95102	LA-31 San Felices	62	62	71	76	76	78	78	78	78	78	40	40	40	40	40	40	40	40	40	44	46	46	50	50	50	53	57	57	60	63	38	45	47	49	49	-	-	-	-	52	59	66	66	68	-	-	-	-
95054	Population-8039	69	71	71	74	74	74	74	76	76	78	37	40	40	40	40	40	40	40	40	40	53	53	53	53	53	53	55	55	55	55	42	42	42	45	45	-	-	-	-	52	57	57	57	61	-	-	-	-
95521	ILCA13677	69	71	71	71	76	78	78	82	-	-	40	40	40	40	40	40	44	44	47	47	48	53	55	63	71	-	-	-	-	-	-	-	-	-	-	-	-	-	-	-	-	-	-	-	-	-	-	-
95071	Population B-266/79	67	69	76	76	76	76	81	81	81	-	35	40	40	40	40	40	40	40	44	44	53	53	53	53	53	60	60	64	68	74	45	47	47	52	63	-	-	-	-	52	54	64	64	66	-	-	-	-
95606	Population-776	71	74	76	76	76	76	78	78	78	-	40	40	44	44	44	44	44	44	49	-	53	55	54	-	-	-	-	-	-	-	-	-	-	-	-	-	-	-	-	-	-	-	-	-	-	-	-	-
95203	Populacja z Syrii	67	71	81	81	81	71	71	78	81	81	40	40	40	40	40	44	47	-	-	-	43	43	43	43	48	48	58	59	-	-	-	-	-	-	-	-	-	-	-	-	-	-	-	-	-	-	-	-
95519	P27174	77	78	78	78	78	78	78	79	79	80	39	46	52	-	-	-	-	-	-	-	79	78	82	73	78	90	-	-	-	-	54	53	55	-	-	-	-	-	-	71	73	73	73	73	-	-	-	-
95042	Population-8022	71	75	78	78	81	83	83	-	-	-	40	40	40	40	40	44	44	-	-	-	60	60	60	60	60	60	63	-	-	-	45	49	52	52	56	-	-	-	-	52	52	57	59	64	-	-	-	-
95252	Pop.2579B	56	76	82	82	81	81	83	83	83	81	37	40	40	40	40	-	-	-	-	-	66	69	69	78	-	-	-	-	-	-	-	-	-	-	-	-	-	-	-	-	-	-	-	-	-	-	-	-
95035	Population-8010	75	75	78	81	81	81	81	83	83	-	44	44	44	44	44	44	44	44	44	44	55	57	57	60	60	60	67	-	-	-	45	47	49	49	49	-	-	-	-	57	61	64	64	-	-	-	-	-
95033	Population-8006	78	78	81	81	81	83	83	83	-	-	40	40	44	44	44	44	44	44	47	54	57	60	60	63	63	67	67	67	-	-	42	45	52	54	-	-	-	-	-	64	64	64	68	75	-	-	-	-
95251	Pop.2579	81	81	83	-	-	-	-	-	-	-	37	37	40	40	40	40	40	40	40	-	57	60	67	67	67	67	67	67	-	-	-	-	-	-	-	-	-	-	-	-	-	-	-	-	-	-	-	-
95108	Population-84002	78	81	83	83	83	83	83	-	-	-	33	33	40	40	40	44	47	47	-	-	53	53	53	60	63	74	-	-	-	-	49	52	54	59	59	-	-	-	-	54	57	59	80	-	-	-	-	-
95072	Population B-267/79	81	81	81	81	81	83	83	83	89	89	40	40	40	40	40	40	40	44	44	44	67	67	67	69	69	69	71	71	-	-	47	47	47	-	-	-	-	-	-	64	64	66	71	71	-	-	-	-
95609	P.26780	78	81	82	83	89	89	89	-	-	-	40	40	40	44	44	44	44	-	-	-	74	78	84	-	-	-	-	-	-	-	77	77	67	-	-	-	-	-	-	68	82	82	82	82	-	-	-	-
95605	Population-743	83	89	89	89	89	89	89	89	89	89	44	44	47	47	47	51	51	51	51	51	71	81	81	-	-	-	-	-	-	-	59	59	61	-	-	-	-	-	-	73	92	92	92	90	96	93	93	96

## Sheet: TableS3
Quantitative control of early flowering in white lupin (Lupinus albus L.)
Sandra Rychel-Bielska, Anna Surma, Wojciech Bielski, Bartosz Kozak, Renata Galek, and Michał Książkiewicz
Supplementary Table S3. Mean values and standard deviation of flowering time observed for white lupin lines used in the study.
Accession	Name	2020 non-vernalized mean	2020 non-vernalizedSD	2018 non-vernalized mean	2018 non-vernalized SD	2018 vernalized mean	2018 vernalized SD	2018 vernalization response	2015 non-vernalized mean	2015 non-vernalized SD	2015 vernalized mean	2015 vernalized SD	2015 vernalization response
95406	R-933	59.5	0.921954	43.6	2.498	35	1.63299	-8.6	42.75	1.78536	41.3333	0.471405	-1.41667
95424	Kali x Laju Biały-1	51.6667	4.44722	39.4	1.2	33	0	-6.4	42.1667	0.372678	40.5	0.5	-1.66667
95427	Sel.ecot. x LA-109/1	56.5	0.5	43.3	0.9	40.4	1.2	-2.9	49.5	0.866025	46	1	-3.5
95440	HetmanxStart	54.6	1.95959	42.5556	1.25708	35.6667	0.942809	-6.88889	42	0	41.4	0.489898	-0.6
95442	Mutant SelfCompleting x Nahrq.	71.125	3.88708	52.1	4.98899	42.9	2.77308	-9.2	48.2	3.18748	45.4	0.8	-2.8
95470	R6902 x El Harrach 2	68.3	6.58863	54.2	4.66476	42.4	1.95959	-11.8	50.6	4.84149	45	0	-5.6
95237	L. graecus x Mut.Topless x Hetman F	60.5	9.11318	43.2857	0.699854	40.2	2.22711	-3.08571	49.6	6.31189	43.2	4.16653	-6.4
95414	Bialorus-1	59.3	8.47408	42.7143	3.73073	38.5556	2.11403	-4.15873	-	-	-	-	-
95415	Bialorus-2	54.8333	2.33928	46	0	41.6667	3.29983	-4.33333	-	-	-	-	-
95416	Bialorus-3	53.8	5.70614	54.125	5.15843	37.5	2.5	-16.625	-	-	-	-	-
95404	R-6020	59.4	5.10294	-	-	-	-	-	-	-	-	-	-
95418	Bialorus-5	52	0.755929	-	-	-	-	-	-	-	-	-	-
95276	Siebacher Red BGR 6321	65.1	7.77753	57.2	7.44043	38.4	2.24499	-18.8	53.8	3.65513	47	0	-6.8
95409	Neutra	68.125	3.44374	43.9	1.37477	33	0	-10.9	52.2	4.4	46	4.06202	-6.2
95422	Start	52.75	3.83243	40.1429	1.80702	37	1.82574	-3.14286	41.25	0.433013	40.6667	0.471405	-0.583333
95428	Pflugs Gela	60.1	0.7	42.8	3.1241	36.2	3.31059	-6.6	44.5	0.5	42.6667	0.471405	-1.83333
95479	Kijewskij Mutant	55.9	1.04403	43	0	33	0	-10	44	0.894427	38.4	0.489898	-5.6
95480	Nelly	53.4	1.8	41.4	1.95959	37.5	2.80179	-3.9	46.5	2.14087	46.3333	1.88562	-0.166667
95513	Butan	50.2	3.2187	39	0	36.5556	2.00616	-2.44444	41.75	0.433013	40.3333	0.471405	-1.41667
95482	Pikador	52.6	2.33238	39.4	1.2	34.8	1.8868	-4.6	49.25	1.29904	42.3333	0.471405	-6.91667
95530	Boros	50.6	2.2891	39	0	34	1	-5	43.5	1.5	41	0	-2.5
95419	Kalina	60	5.65685	41.2857	1.97949	33	0	-8.28571	47.8333	2.54406	45.3333	6.20931	-2.5
95403	Wat	52.1	1.37477	42.6	3.13688	36.8	2.85657	-5.8	48.25	1.29904	42	1.22474	-6.25
95481	Bardo	54.9	0.7	41.6667	1.88562	36.8	1.83303	-4.86667	47.6	1.2	41.6	0.8	-6
95476	Athos	79.4286	9.0689	66.5714	8.36416	61.3333	14.2906	-5.2381	73.75	10.329	47.5	4.5	-26.25
95434	Lotos	50.8	3.45832	40	2.82843	36.9	2.34307	-3.1	43.25	1.29904	41.6667	0.471405	-1.58333
95510	Hansa (95510)	54	0	39.8	1.6	38.8	1.46969	-1	43.2	0.979796	41.3333	0.942809	-1.86667
95275	BGR6305	54.9	4.7634	46.375	5.19465	36.9	2.16564	-9.475	-	-	-	-	-
95431	Volodia	56.9	3.04795	44.875	2.42061	36.4286	2.25877	-8.44643	-	-	-	-	-
95432	Primorskij	56.6	4.71593	43.25	3.19179	38.125	2.42061	-5.125	-	-	-	-	-
95433	Dniepr	52.4	0.489898	42.375	4.35711	39.4	4.8	-2.975	-	-	-	-	-
95439	Silosnyj	51.7	3.43657	40.125	2.97647	37.3	1.95192	-2.825	-	-	-	-	-
95443	Lublanc	58.8	2.13542	54.5	2.59808	42.2857	1.97949	-12.2143	-	-	-	-	-
95456	Horizont	64.5	2.87228	50.875	7.45717	41.8	3.6	-9.075	-	-	-	-	-
95405	Kali	50.25	4.54835	-	-	-	-	-	-	-	-	-	-
95423	Amiga	60.9	5.46717	-	-	-	-	-	-	-	-	-	-
95430	Rimpaus Friihe Siisse Weisslup	53.8	2.63818	-	-	-	-	-	-	-	-	-	-
95445	Lutrop	54.8	1.4	-	-	-	-	-	-	-	-	-	-
95449	Buttercup	58.8	0.979796	-	-	-	-	-	-	-	-	-	-
95452	WTD-286	55.8889	3.31476	-	-	-	-	-	-	-	-	-	-
95454	Tombowskij Skorospielyj	52	0.894427	-	-	-	-	-	-	-	-	-	-
95509	Nahrquell	49.3	3.40735	-	-	-	-	-	79.3333	11.7851	-	-	-
95413	Kiev Mutant	55.3	0.458258	44.2	2.44131	37	1.73205	-7.2	44.6	0.8	38.5714	0.728431	-6.02857
95113	LA-108	69.8	4.51221	56.75	3.89711	39.7	0.9	-17.05	50.8	0.979796	49.4	4.8	-1.4
95114	LA-109	64.4286	5.97273	46.7	3.87427	39.5	1.5	-7.2	52.6	0.8	45.8	0.979796	-6.8
95130	Population-84152	65.25	6.64737	53.7	4.00125	37.6	3.00666	-16.1	56.5714	3.65893	47.6	4.40908	-8.97143
95132	Tremoco Gorzki	71.6	5.1614	62.3333	5.37484	39.6	3.72022	-22.7333	57.5714	2.96923	50.75	8.84237	-6.82143
95146	AL-19	67.7	7.53724	59	7.28011	39.1	1.37477	-19.9	58.625	8.19966	45	2.44949	-13.625
95149	AL-22	68.8	4.16653	54.5	1.65831	36.7143	0.699854	-17.7857	55.25	3.83243	44	1.80278	-11.25
95151	AL-26	65.9	3.91024	57.6667	4.52155	37	0	-20.6667	57.7778	4.28895	44.375	1.99609	-13.4028
95152	AL-27	64.1	2.21133	54.6	3.95474	36.8889	2.64342	-17.7111	54	3.33809	46.6667	6.59966	-7.33333
95155	R-32	72.5	3.00832	49.8	0.6	39.4	1.2	-10.4	56.75	1.78536	45.6	4.40908	-11.15
95211	Turmus balady gadim,Druze L.R.	73.7143	1.27775	60.2	6.85274	39.1111	1.72848	-21.0889	57	0	53.4	3.2	-3.6
95212	Turmus b. g. L.R.M.-2738	89.5	1.5	80	1.63299	38.5	1.5	-41.5	76.4	11.5343	50.25	3.03109	-26.15
95213	Turmus balady L.R.M.-2675	72.75	1.29904	60	0	38.7143	1.48461	-21.2857	44	0	41	0	-3
95219	Giza-2	69.1111	10.4184	45.6	3.87814	36.2	2.35797	-9.4	49	2.44949	43.8	5.07543	-5.2
95234	P.21525	53.1429	2.2315	43.1	2.42693	33	0	-10.1	46.5	2.29129	42.2	2.56125	-4.3
95407	Tremoco Doce	65	4.89898	48.7	4.9	34.4	0.916515	-14.3	54.4	3.2619	42.4	3.00666	-12
95468	Azurnyj	59.4	1.2	44.4286	2.25877	38.9	2.21133	-5.52857	48.2	3.42929	50.2	4.48999	2
95036	Population-8011	78	4.58258	62.4	3.13688	40.9	2.21133	-21.5	58	1	46	2	-12
95163	SF-387	62.6	2.498	55	4.69042	40.6	2.93939	-14.4	58.2	9.5163	50	6.2849	-8.2
95084	El Harrach-1	59.7	3.19531	47.1	5.22398	35.8	0.979796	-11.3	52	4.14729	41.4	4.07922	-10.6
95145	AL-18	71.4	6.75574	60.3333	4.10961	39.5	2.01246	-20.8333	57	4.94975	45	3.63318	-12
95147	AL-20	68.3	2.96816	51.2	2.67582	39.4	1.2	-11.8	53	2	46.8	2.71293	-6.2
95097	Tremoco	65.9	2.16564	51.8	4.14246	40.7	2.1	-11.1	51.8	2.71293	49.5	2.87228	-2.3
95153	AL-28	70.9	3.3	63	5.19615	38.6667	1.49071	-24.3333	57	0	52.25	2.48747	-4.75
95175	R-84141	71.9	2.21133	54.5	5.22015	40	0	-14.5	52	0	47.2	4.53431	-4.8
95148	AL-21	76.6	1.2	67.6667	0.942809	43.2	1.6	-24.4667	67.4	1.95959	54.3333	3.29983	-13.0667
95157	R-114	81.625	4.7942	90	0	47.3	5.56866	-42.7	85.25	7.1894	52.8	1.6	-32.45
95103	LA-20	71	4.73286	62.7	3.0348	40.8	1.6	-21.9	53.6667	2.35702	46.4	2.8	-7.26667
95085	El Harrach-2	55.3	5.34883	44.1667	4.98052	39	1.41421	-5.16667	-	-	-	-	-
95086	El Harrach-3	67.8	2.78568	59.3333	3.03681	40	0	-19.3333	-	-	-	-	-
95087	El Harrach-4	67	7.79744	53	8.3666	40	0	-13	-	-	-	-	-
95220	FAM 120	57.9	4.01123	43.875	3.55097	35.8	1.32665	-8.075	-	-	-	-	-
95012	Magarraz-2	72.2	7.63937	-	-	-	-	-	-	-	-	-	-
95062	Population-8057	63.4444	8.22072	-	-	-	-	-	-	-	-	-	-
95160	R-243	54.3	2.75862	-	-	-	-	-	-	-	-	-	-
95166	SF-479	63.6667	4.94413	-	-	-	-	-	-	-	-	-	-
95176	WTD 6020	54.7	2.14709	-	-	-	-	-	-	-	-	-	-
95177	Mutant Self Completing	66.5	1.80278	43.3	0.9	37.3	1.95192	-6	50	0	45	0	-5
95144	M.Mut.z Hiszp.(topless)	70.7	7.45721	57	3.82099	40.4	1.2	-16.6	58.75	6.2998	45.25	4.08503	-13.5
95116	Mutant cienkoscienny	86.4	3.69324	78.3333	3.68179	40.4	1.2	-37.9333	86.4	5.23832	50	3.08221	-36.4
95523	FRA6708B	47.2222	2.09644	37.1111	2.33069	35.6	1.28062	-1.51111	37.75	0.433013	37.5	0.5	-0.25
95524	FRA6712B	47.9	2.02237	38.4	1.2	34	1	-4.4	39	3.09839	37.8	0.748331	-1.2
95516	MJS208-2	48	1	47	2.94392	40.25	2.48747	-6.75	50	0	45.5	0.866025	-4.5
95525	FRA6713B	49.3333	1.49071	38.4	1.2	38.3333	5.31246	-0.0666667	40.8571	5.89015	41.6667	5.52771	0.809524
95528	LA384	50.9	3.5623	39.5	1.96214	36	1.34164	-3.5	43.4	0.489898	40.5	0.866025	-2.9
95244	Pop. 2027	51.3	4.02616	51.8	6.89638	33.9	2.11896	-17.9	46.8	6.43117	46.1429	5.84144	-0.657143
95109	Population-84003	52.4	4.65188	47.4	9.45727	39.9	2.42693	-7.5	53.4444	8.40782	53.6667	11.0454	0.222222
95007	Mansilla de los Mulas	53	3	-	-	-	-	-	-	-	-	-	-
95223	TR-5	53.3333	8.99383	45.2222	6.77869	39.25	2.90474	-5.97222	47	4.93964	40.2857	2.37332	-6.71429
95101	Calabria	53.5	2.14087	41.1	2.91376	35.5	1.74642	-5.6	41	0	40.3333	0.471405	-0.666667
95515	MJS208-1	53.5	0.5	42	3.16228	40.7143	4.39852	-1.28571	44	0	47	1.63299	3
95526	LA359	54	1	40.7	2.9	36.2222	2.78	-4.47778	47.75	1.29904	40	0	-7.75
95517	Damascus	55.1111	2.51416	42.375	4.35711	40	0	-2.375	49.2	6.58483	44.6	1.2	-4.6
95187	BGRC-3911	55.875	3.2186	43	0	33	0	-10	44.5	1.65831	40.4	0.8	-4.1
95527	LA382	56.1	2.77308	43.2	2.85657	34.2	1.32665	-9	47	3	44.6667	5.24934	-2.33333
95133	VIR Leningr.-490	56.2	3.28024	42	3.0706	40.5	1.32288	-1.5	-	-	-	-	-
95230	L.46-10	57.5	2.69258	52.3333	0.471405	-	-	-	-	-	-	-	-
95197	BGRC-3921	57.7	3.1	45.1667	3.80424	40	0	-5.16667	-	-	-	-	-
95246	Pop.2078	57.9	4.39204	47.6	6.08605	39	2	-8.6	50.75	2.58602	48.25	4.91808	-2.5
95255	Egipt-8	59	0.816497	48	0	41.3333	1.88562	-6.66667	-	-	-	-	-
95215	ICARDA,IFLUE-33	59.1	5.02892	48.25	3.03109	38.125	1.45237	-10.125	-	-	-	-	-
95522	FRA6706B	59.4	6.03656	42.8	3.1241	37.6	3.00666	-5.2	46	2.32993	41.8	1.83303	-4.2
95216	L-229-N	59.8	0.4	43.75	1.29904	35.8	2.5219	-7.95	48	2.94392	40.6667	0.471405	-7.33333
95254	Egipt-7	60	4.76095	50.75	2.33184	38.9	4.10974	-11.85	-	-	-	-	-
95269	BG-9787	60.2222	7.8142	48.5	0.866025	41.3333	1.88562	-7.16667	-	-	-	-	-
95076	Population B-296/76	60.8	4.42267	49.2	6.35295	35.6	2.33238	-13.6	51.6	1.95959	39.8	2.71293	-11.8
95245	Lupini Bean	61.2857	5.11899	56.1	2.21133	38.4	2.05913	-17.7	55	2.44949	48.5	3.5	-6.5
95077	Population B-297/79	61.3	6.49692	56.3333	6.66667	34.6	0.8	-21.7333	55.5556	5.71764	40	0	-15.5556
95602	Population-775	61.7	2.45153	43.9	3.61801	35	1.78885	-8.9	45	0	40	0	-5
95243	Pop.2023	63.1	3.3	49.7	3.49428	40	0	-9.7	50.2	2.22711	45.4	0.8	-4.8
95231	Pop.z Syrii	63.2	9.93781	40	1	41.125	2.42061	1.125	-	-	-	-	-
95125	Population-877	63.4	4.67333	51.2	2.67582	39.4	1.2	-11.8	52.2	4.4	42.6	1.2	-9.6
95038	Population-8018	63.5	3.00832	53.3	6.40391	35.2	0.6	-18.1	53.5556	2.21666	48.5556	3.0952	-5
95529	LA423	63.6	4.47661	57.4286	3.49927	40.4	3.13688	-17.0286	51.5	1.65831	43.5	1.5	-8
95143	Population-199	64.2	3.84187	52.2	1.66132	38.8	1.46969	-13.4	54.5714	2.92072	45.8	0.979796	-8.77143
95518	ILCA13665	64.5	3.1225	46.25	3.30719	39.8889	2.13148	-6.36111	-	-	-	-	-
95080	Population B-2007/80	64.8	4.30813	53.5	1.32288	36.1	1.57797	-17.4	54.6667	4	44.2	1.93907	-10.4667
95015	San Felices	64.8571	7.75387	56.25	9.92157	38	1.41421	-18.25	53	6	44.5	2.92973	-8.5
95266	Pop.Setubal	65.4	7.88923	52.125	7.0788	40.5556	2.0608	-11.5694	-	-	-	-	-
95023	Oeiras-930/3	65.7	6.05062	70	0.816497	41.3333	1.88562	-28.6667	-	-	-	-	-
95048	Population-8031	65.8889	4.72451	58.3	6.75352	38.8	1.46969	-19.5	58	5.24404	46.2	0.979796	-11.8
95253	Egipt-5	66.1	1.97231	46.8333	3.57849	39.8571	2.41593	-6.97619	-	-	-	-	-
95049	Population-8032	66.4	6.84398	54.7	3.74299	38.8	1.46969	-15.9	57.5	4.272	44.75	4.54835	-12.75
95095	Azorski	67.4	7.37835	-	-	-	-	-	-	-	-	-	-
95128	Population-84075	67.4286	4.43548	-	-	-	-	-	-	-	-	-	-
95075	Population B-295/79	67.6	10.7536	57.5	10.6325	40	0	-17.5	57.8	7.83326	47.75	10.7325	-10.05
95520	ILCA13674	68	0	66	1	-	-	-	-	-	-	-	-
95138	Population-187	68.2	4.70744	-	-	-	-	-	-	-	-	-	-
95047	Population-8030	68.6	1.74356	54.5	6.18466	38.5	2.65518	-16	61.25	9.65337	42.8571	2.47436	-18.3929
95040	Population-8020	69.4	7.73563	58.8	6.50846	42.3333	2.98142	-16.4667	58	6.16441	47.5	1.65831	-10.5
95264	Tremoco Beja	69.5	3.90512	51.875	1.45237	38.5	1.5	-13.375	-	-	-	-	-
95124	Population-780	69.8	4.72864	57.5	4.00625	40	0	-17.5	54.4	2.57682	53	5.17687	-1.4
95064	Population-8062	70	5.59762	57.1	6.17171	37.8	1.93907	-19.3	60.6	4.58694	42.8	3.05941	-17.8
95034	Population-8009	70.2222	3.76468	55.3333	3.29983	42	3.74166	-13.3333	56.4	2.93939	47.6667	0.942809	-8.73333
95257	Pop.52892	71	2.54951	53.6667	5.84998	40.8889	1.66296	-12.7778	-	-	-	-	-
95267	Lobbi Barcelona	71.7	6.79779	50.1	6.7	38.5	2.29129	-11.6	57	3.08221	51.2	1.83303	-5.8
95059	Population-8053	72.3	4.14849	49.8571	1.55183	39.8	1.83303	-10.0571	56	7.92465	46	1	-10
95239	Altramuz Chocho1	72.3333	4.49691	-	-	-	-	-	-	-	-	-	-
95078	Population B-300/79	72.6	1.8	62.1	7.10563	35.4	2.45764	-26.7	53.6667	2.86744	43.2	1.46969	-10.4667
95185	BGRC-3909	72.75	4.14578	58.8	3.42929	39.25	1.29904	-19.55	-	-	-	-	-
95214	ICARDA,IFLU-29	72.75	1.98431	52	6.81909	39.4	2.61534	-12.6	-	-	-	-	-
95041	Population-8021	72.9	3.67287	62.8	5.3066	39.4444	1.57135	-23.3556	57.4	3.00666	42	0.707107	-15.4
95102	LA-31 San Felices	73.7	6.19758	53.2	5.52811	40.4	1.2	-12.8	62.2	5.94643	45.6	4.07922	-16.6
95054	Population-8039	73.7	2.57099	53.8	0.979796	39.7	0.9	-14.1	56.8	2.85657	43.2	1.46969	-13.6
95521	ILCA13677	74.5	4.33013	58	8.09938	42.2	2.85657	-15.8	-	-	-	-	-
95071	Population B-266/79	75.8889	4.77131	59.1	7.1617	40.3	2.36854	-18.8	60	5.79655	50.8	6.5238	-9.2
95606	Population-776	75.8889	2.13148	54	1	43.6667	2.49444	-10.3333	-	-	-	-	-
95203	Populacja z Syrii	76.3	5.3301	48.125	6.3332	41.5714	2.61081	-6.55357	-	-	-	-	-
95519	P27174	78.3	0.781025	80	5.19615	45.6667	5.31246	-34.3333	72.6	0.8	54	0.816497	-18.6
95042	Population-8022	78.4286	4.06579	60.4286	1.04978	41.1429	1.80702	-19.2857	56.8	4.53431	50.8	3.65513	-6
95252	Pop.2579B	78.8	7.84602	70.5	4.5	39.4	1.2	-31.1	-	-	-	-	-
95035	Population-8010	79.7778	2.89742	59.4286	3.57999	44	0	-15.4286	61.5	2.87228	47.8	1.6	-13.7
95033	Population-8006	81	1.93649	63	3.57071	44.5	3.72156	-18.5	67	4.28952	48.25	4.91808	-18.75
95251	Pop.2579	81.6667	0.942809	64.875	3.75624	39.3333	1.24722	-25.5417	-	-	-	-	-
95108	Population-84002	82	1.77281	59.3333	7.63035	40.5	5.12348	-18.8333	62.5	10.2591	54.6	3.92938	-7.9
95072	Population B-267/79	83.2	3.02655	68.75	1.56125	41.2	1.83303	-27.55	67.2	3.18748	47	0	-20.2
95609	P.26780	84.4286	4.20398	78.6667	4.10961	42.2857	1.97949	-36.381	79.2	5.6	73.6667	4.71405	-5.53333
95605	Population-743	88.4	1.8	77.6667	4.71405	48.4	2.8	-29.2667	90.7778	6.54519	59.6667	0.942809	-31.1111

## Sheet: TableS4
Quantitative control of early flowering in white lupin (Lupinus albus L.)
Sandra Rychel-Bielska, Anna Surma, Wojciech Bielski, Bartosz Kozak, Renata Galek, and Michał Książkiewicz
Supplementary Table S4. The list of markers used in the study with localization on linkage map, QTL assignment, accession numbers and sequences of both alleles.
Marker name	Reference	Linkage group	Position	QTL/2019	Primer "forward" sequence	Primer "reverse" sequence	Accession P27174	Accession Kiev Mutant	Sequence P27174	Sequence Kiev Mutant	Additive effect '2015	Additive effect '2018	Additive effect '2020
PIF4-F1	Mol Breeding 39:43	-	-	-	TTAGAGGGAAAGAGGAAAAGGGC	ATTTGAAGTTGCATGAGGAGCAC	LC434277	LC434278	TTAGAGGGAAAGAGGAAAAGGGCNNNNNNNNNNNNNNNNNNNNNNNNNNNGGTATTAGCTATATCTCATGAGTGCTTCTTCTTTTCTGCTCTTATATATAATTGTAAAGGAGAGTCTGGTGTATTTTTTCCAATTATATTTGCTTGTTTTATGTTTTTCATTAATCACAGAAAGTAAAGTTTTCAGCTATTTGTAAATCACTTCATTTTTTTTAATTTGTGACCCATTTCTAGTCTTCTAGTGCTAATAAACTGTCTCAATTTTTTCCAACTTTGTTGGGTATTTTTCTTTAATACTTGTATATCATTATTGTTTATTGCTGTTCTTGGCCTGTTTTTTAATGTGCATGGTGTACTTTTAACTATAGTTGAATTTCCTTTTTGGACCTCTTGGAGAGTA…	TTAGAGGGAAAGAGGAAAAGGGCNNNNNNNNNNNNNNNNNNNNNNNNNNNGGTATTAGCTATATCTCATGAGTGCTTCTTCTTTTCTGCTCTTATATATAATTGTAAAGGAGAGTCTGGTGTATTTTTTCCAATTATATTTGCTTGTTTTATGTTTTTCATTAATCACAGAAAGTAAAGTTTTCAGCTATTTGTAAATCACTTCATTTTTTTTAATTTGTGACCCATTTCTAGTCTTCTAGTGCTAATAAACTGTCTCAATTTTTTCCAACTTTGTTGGGTATTTTTCTTTAATACTTGTATATCATTATTGTTTATTGCTGTTCTTGGCCTGTTTTTTAATGTGCATGGTGTACTTTTAACTATAGTTGAATTTCCTTTTTGGACCGCTTGGAGAGTA…	-	-	-
ELF4-F1	Mol Breeding 39:43	-	-	-	TAAGAGCCACCACCATTACCAAC	TGTGAAATTCGAGTTGAGATCGG	LC434207	LC434208	TAAGAGCCACCACCATTACCAACCCTCCGCCACCATGACCACCACCACCGGTACTCAGACTACGAGACCGAGGAGGGAGATCCTGAGGTATGGGCCACTTTCAACAATAGCTTCAAACAGGTGCAATCAGTATTGGATAGGAACAGACACTTGATTCAGCAAGTGAATGAAAACCATCAATCTAGGATGCATGACAACATGGTAAAGAATGTTTCTTTGATTCAGGAACTCAATGGTAACATCAATAAGGTTGCTTCAATTTATTCCGATCTCAACTCGAATTTCACA	TAAGAGCCACCACCATTACCAACCCTCCGCCACCATGACCACCACCACCGGTACTCGGACTACGAGACCGAGGAGGGAGATCCTGAGGTATGGGCCACTTTCAACAATAGCTTCAAACAGGTGCAATCAGTATTGGATAGGAACAGACACTTGATTCAGCAAGTGAATGAAAACCATCAATCTAGGATGCATGACAACATGGTAAAGAATGTTTCTTTGATTCAGGAACTCAATGGTAACATCAATAAGGTTGCTTCAATTTATTCCGATCTCAACTCGAATTTCACA	-	-	-
FY-F6	Mol Breeding 39:43	ALB01	42.2	-	ATGGTGATATCCATGGTGCAAA	ACTGTCCTGTCCCTTGAATCTC	LC434157	LC434158	ATGGTGATATCCATGGTGCAAAAAGANTGAGAAAGCTTGCTCAAAGGAAGGCGGTTGATTATACGAGCACAGTTGTGCGTTATATGCAGGTAANGATTACTGCTTANTTATGAAATTATNTATATTATACACAAAAACCNCCGNGCCTTATATACANATATATATATATATATAATCTTTTTACATCTTTATTTATAGTTTGGTCATAGGCTTATTGTTATATTGCAAAATGTTTTTTTGCTTGTTTTTCTCCTTATTGTGTGTATTTCTCTTGAAATTCATTGGTAATCTAAAACGNNNNNNNNNNNNNNNNNNNNNNNNNNNNNNNNNNNNNNNNNNNNNNNNNNNNNNNNNNNNNNNNNNNNNNNNNNNNNNNNNNNNNNNNNNNNNNNNNNNNAT…	ATGGTGATATCCATGGTGCAAAAAGANTGAGAAAGCTTGCTCAAAGGAAGGCGGTTGATTATACGAGCACAGTTGTGCGTTATATGCAGGTAANGATTACTGCTTANTTATGAAATTATNTATATTATACACAAAAACCNCCGNGCCTTATATACANCTATATATATATATATAATCTTTTTACATCTTTATTTATAGTTTGGTCACAGGCTTATTGTTATATTGCAAAATGTTTTTTTGCTTGTTTTTCTCCTTATTGTGTGTATTTCTCTTGAAATTCATTGGTAATCTAAAACGNNNNNNNNNNNNNNNNNNNNNNNNNNNNNNNNNNNNNNNNNNNNNNNNNNNNNNNNNNNNNNNNNNNNNNNNNNNNNNNNNNNNNNNNNNNNNNNNNNNNAT…	2.37	5	3.23
GI-F1	Mol Breeding 39:43	ALB02	2.2	1/ALB02 (2.2 cM)	TCTAGAGCAGGTAATCCAGCAAC	TTGCTAATGGTGCTGGTGTTATATTAAA	LC434159	LC434160	TCTAGAGCAGGTAATCCAGCAACTAAATGCTCATCCAGAGCAGTTGTTGGAGGAGGAGAGCAAAGTGCAGGTACAGCAGCTGCTGTTAAAGTAGCAGTCTCATTGCGAGCGACTTCATCATCACAAACGTTTAATATAACACCAGCACCATTAGCAA	TCTAGAGCAGGTAATCCAGCAACTAAATGCTCATCCAGAGCAGTTGTTGGAGGAGGAGAGCAAAGTGCAGGTACAGCAGCTGCTGTTAAAGTAGCAGTCTCATTGCGAGCGACTTCATCATCACAAACATTTAATATAACACCAGCACCATTAGCAA	-	-	-
FTa1-F2	Mol Breeding 39:43	ALB02	100.2	2/ALB02 (100.2 cM)	ACCTTCTTCCACCAGAACCAG	AGCAACTACTGGGCCTAGT	LC434151	LC434152	ACCTTCTTCCACCAGAACCAGATTCTCTCTGAATGTTAAAATAGACAGCAGAAACTGGTGATCCAAGATTGTAAAGTTCAGCAAATTCTCTTGTATTGAAATTTTGGCGCCATCCTGGAGCATACACTGTTTCTCTACCAAGTTGACGAAATAACACAAAAACTATTCGATGAATTCCCATTAAGGGTCTTGGATTTTCATAACTTACAACCTCATGACCTGAACATGCCAATAATGCAAACTTATTGTTAGTATATATATAAGTATAATTTCATGTAGATAATATCTACCATTTTCTAACAATTTATATCTATCTAATAAAAATCTCAATTTATAGTCAATATTTTGAAGAAATTTACTCCCTCTAACTTACTATTATTAGCATTTTCATACAAAAAA…	ACCTTCTTCCACCAGAACCAGATTCTCTCTGAATGTTAAAATAGACAGCAGAAACTGGTGATCCAAGATTGTAAAGTTCAGCAAATTCTCTTGTATTGAAATTTTGGCGCCATCCTGGAGCATACACTGTTTCTCTACCAAGTTGACGAAATAACACAAAAACTATTCGATGAATTCCCATTAAGGGTCTTGGATTTTCATAACTTACAACCTCATGACCTGAACATGCCAATAATGCAAACTTATTGTTAGTATATATATAAGTATAATTTCATGTAGATAATATCTACCATTTTCTAACAATTTATATCTATCTAATAAAAATCTCAATTTATAGTCAATATTTTGAAGAAATTTACTCCCTCTAACTTACTATTATTAGCATTTTCATACAAAAAA…	-	-	-
FLD-F1	Mol Breeding 39:43	ALB03	62.8	-	TCAACAAAGAAGCGAAAACCGAG	GATTCCCTAGCGTACCTGTCAAA	LC434141	LC434142	TCAACAAAGAAGCGAAAACCGAGGCCTTGATCGCCCTCACGGCTGGTTTCCCTGCTGATTCGCTGACCGAGGAAGAAATCGAAGGCGGGGTTATCCCTGTTATTGGAGGGATAGAGCAGGTGAATTACACTCTCATTAGGAATCACATTATTGCTAGGTGGCGTGAGAATGTGTCTAATTGGGTTACTAAGGAAATGTTCATTGGTTATATACCTCAACATTATCATACCCTTTTGGATTCTGCTTATAATTATCTTGTTTCTCATGGGTATATTAATTTTGGGGTTGCTCCCCTTATTAAGGAAAGGATTCCGGCTGAGCCGAGCAAGCCGGGTGTGATTGTAATTGGCGCTGGCCTTGCTGGGTTGGCTGCTGCGCGGCAGCTGATGCGGTTTGGGT…	TCAACAAAGAAGCGAAAACCGAGGCCTTGATCGCCCTCACGGCTGGTTTCCCTGCTGATTCGCTGACCGAGGAAGAAATCGAAGGCGGGGTTATCCCTGTTATTGGAGGGATAGAGCAGGTGAATTACACTCTCATTAGGAATCACATTATTGCTAGGTGGCGTGAGAATGTGTCTAATTGGGTTACTAAGGAAATGTTCATTGGTTATATACCTCAACATTATCATACCCTTTTGGATTCTGCTTATAATTATCTTGTTTCTCATGGGTATATTAATTTTGGGGTTGCTCCCCTTATTAAGGAAAGGATTCCGGCTGAGCCGAGCAAGCCGGGTGTGATTGTAATTGGCGCTGGCCTTGCTGGGTTGGCTGCTGCGCGGCAGCTGATGCGGTTTGGGT…	1.9	1.78	2.29
PIF4-F6	Mol Breeding 39:43	ALB04	7.3	-	GGGTCAACTTTGAGGACTAGTGT	TTCCTTCTTCCAATGGCTTGA	LC434169	LC434170	GGGTCAACTTTGAGGACTAGTGTACCTTATGGCAACTCAAGTAATTTGAGTCAAGAAGATGAGACAATTTCATGGCTCCAATACCCTCTTGAGGATCCATTGGAACAACAATTTAGTTCAAACTTTTTACCTGAAATAGCACCTTATCATGTTGAGTCTTATAAGCCAATCAAGCCATTGGAAGAAGGAA	GGGTCAACTTTGAGGACTAGTGTACCTTATGGCAACTCAAGTAATTTGAGTCAAGAAGATGAGACAATTTCATGGCTCCAATACCCACTTGAGGATCCATTGGAACAACAATTTAGTTCAAACTTTTTACCTGAAATAGCACCTTATCATGTTGAGTCTTATAAGCCAATCAAGCCATTGGAAGAAGGAA	-2.47	-2.07	-1.54
MFT-FT3-F1	Mol Breeding 39:43	ALB05	68.1	-	AGCCATAGAATCTTAGTAGCCCT	TCAGCAGAAAGGACCACTCG	LC434163	LC434164	AGCCATAGAATCTTAGTAGCCCTAGATTGCTTTATAACATATACCTTCCCCCATTATTTATTCATACTAGCAATACATATATATATATATATATATATATATATATATATAATAAAGTTTTCCATTTCCATGCAAGCTTCATAAATGTAGTTGTTGATCATGTTCGCCTCCTAGATGCAGGTTCCTTCTGAGAGTTGAAGTAGACAGTTGCAACAGGGAGTCCCAAGTTCAATTGTCTGGCAAAGTAACGAGTGTTGAAGCTTGCACGAGAGGGTGGCTGCTCCACCAGACCGAGTGGTCCTTTCTGCTGA	AGCCATAGAATCTTAGTAGCCCTAGATTGCTTTATAACATATACCTTCCCCCATTATTTATTCATACTAGCAATACATATATATATATATATATAATAAAGTTTTCCATTTCCATGCAAGCTTCATAAATGTAGTTGTTGATCATGTTCGCCTCCTAGATGCAGGTTCCTTCTGAGAGTTGAAGTAGACAGTTGCAACAGGGAGTCCCAAGTTCAATTGTCTGGCAAAGTAACGAGTGTTGAAGCTTGCACGAGAGGGTGGCTGCTCCACCAGACCGAGTGGTCCTTTCTGCTGA	6.64	4.6	4
MFTa1-F1	Mol Breeding 39:43	ALB05	68.1	-	CAGGTTCCTTCTGAGAGTTGAAGTA	CTTGATCCACCAAGAGTTACCCTTA	LC434165	LC434166	CAGGTTCCTTCTGAGAGTTGAAGTAGACAGTTGCAACAGGGAGTCCCAAGTTCAATTGTCTGGCAAAGTAACGAGTGTTGAAGCTTGTACGAGAGGTGGCTGCTCCACCAGACCGAGTGGTCCTTTCTGCTGGAAAAGGACCAAGATGTAGCGGTGTATCCCCACTGGTGCCCTTGGTCCAACATATGGAAGGATCTCCTTTCCTGCAAGAAAGGAACAAGTTAATACTTACTCAATTAAGGCAATGCTGATAACATAATACAAAGAAATGAAATGGTAATGTTCAATTGTGTATAAATATTAAGAGTGTATGATTAGATTGTGAGGTTTTGATTTAAAACCATGTAGTGTGGAGTGAATAGAGGTTAAGGTTAGTTCATACTTCATTTATAAACTTAA…	CAGGTTCCTTCTGAGAGTTGAAGTAGACAGTTGCAACAGGGAGTCCCAAGTTCAATTGTCTGGCAAAGTAACGAGTGTTGAAGCTTGTACGAGAGGTGGCTGCTCCACCAGACCGAGTGGTCCTTTCTGCTGGAAAAGCACCAAGATGTAGCGGTGTATCCCCACTGGTGCCCTTGGTCCAACATATGGAAGGATCTCCTTTCCTGCAAGAAAGGAACAAGTTAATACTTACTCAATTAAGGCAATGCTGATAACATAATACAAAGAAATGAAATGGTAATGTTCAATTGTGTATAAATATTAAGACTGTATGATTAGATTGTGAGGTTTTGATTTAAAACCATGTAGTGTGGAGTGAATAGAGGTTAAGGTTAGTTCATACTTCATTTATAAACTTAA…	-	-	-
SPL6-F3	Mol Breeding 39:43	ALB07	1.4	-	CTAGTGGTAGTGGAGTCATACCTTC	CAGAAGAGAGAGAGCACAAGAGTC	LC434175	LC434176	CTAGTGGTAGTGGAGTCATACCTTCCGAGAAATATAGAATGAGTAGCTTCTGGGGACCTAATAAAGCAGAACACGGGACAAGTTTTAGGCATCTTTCTTCTATTCCTATCTCCAATGGACATTCTCAGTCAAGATCCCTATTTCCTTCATATAACCAAAAACAATTTCCTTTTCTTCATGAATATGGTGCTACATCCACTACGGGAAGCATCTTTTGTGACAATAATATTCAATATCCACATGTCCTTGGGTCCCAAAATTATGGGTCAAGATCACTATACCACCAGGACACCTCCATAGGATGTGAGGACTTCAATGTTTTTGAAACACCATCAACTGTTCAAGGACTATCGGGAATTTCGGACTCTTGTGCTCTCTCTCTTCTG	CTAGTGGTAGTGGAGTCATACCTTCCGAGAAATATAGAAGAAGTAGCTTCTGGGGACCTAATAAAGCAGAACACGGGACAAGTTTTAGGCATCTTTCTTCTATTCCTATCTCCAATGGACATTCTCAGTCAAGATCCCTATTTCCTTCATATAACCAAAAACAATTTCCTTTTCTTCATGAATATGGTGCTACATCCACTACGGGAAGCATCTTTTGTGACAATAATATTCAATATCCACATGTCCTTGGGTCCCAAAATTATGGGTCGAGATCACTATACCACCAGGACACCTCCATAGGATGTGAGGACTTCAATGTTTTTGAAACACCATCAACTGTTCAAGGACTATCGGGAATTTCGGACTCTTGTGCTCTCTCTCTTCTG	-	-	-
VIP3-F2	Mol Breeding 39:43	ALB07	12.2	-	TTTGCAATGAAACTCGCCGG	AACAAAGCTGTCGAGGGAGG	LC434183	LC434184	TTTGCAATGAAACTCGCCGGAATAAAATCGGTAGATAACGCCCACGATGATTCGGTGTGGATTCGGTGTGGGCAGTTACATGGGTACCAGCAACCGCTAACCGACCACCGCTACTCCTCACTGGTTCACTTGATGAGACCGTCAGGTTGTGGAGGTCCGATGACCTAGTCCTCGAGCGAACCAACACCGGCCACTGTCTCGGCGTCGCTTCCGTCGCCGCTCATCCTCTCGGATCAATCGCCGCTTCGTCCTCCCTCGACAGCTTTGTT	TTTGCAATGAAACTCGCCGGAATAAAATCGGTAGATAACGCCCACGATGATTCGGTGTGGATTCGGTGTGGGCAGTTACATGGGTACCAGCAACCGCTAACCGACCACCGCTACTCCTCACTGGTTCACTTGATGAGACCGTCAGGTTGTGGGGGTCCGATGACCTAGTCCTCGAGCGAACCAACACCGGCCACTGTCTCGGCGTCGCTTCCGTCGCCGCTCATCCTCTCGGATCAATCGCCGCTTCGTCCTCCCTCGACAGCTTTGTT	1.45	1.8	1.64
FCA-F3	Mol Breeding 39:43	ALB07	15.3	-	GTGCCTTCATCCATATCTGCTACTA	ACGAAACAACAAGCACCTTAGAAATT	LC434137	LC434138	GTGCCTTCATCCATATCTGCTACTACTGCCACAGCAGGGATAAGCCAGAACATAGCTCTTGCTAAATGTGATTGGACAGAACATTTATCTCCTGAGGGCTTCAAGTACTACTACAATAGTGTGACTGGTGAAAGTCGGGTAAGAAGTTAATGAGTTGCAATTATGTTTCCTGTTTTTTTTTACTTGTGGAACTGAAGTTTTCTGGAATTAACCTATAGTGGGAGAAACCGGAGGAGTTGGCATTATCTGAACAGCAAAAGCAACAGCGAAGGCTACCTAGTCAGCACTCACAAACTCAGTCACAATCTTCAATGATATCTTCCCAGCAAGTTCCACAAATTCAACAGGCTCAGGCTCATAGTCACTTCCAAGGACAGATTCTCCAGCAGCAACAAATGC…	GTGCCTTCATCCATATCTGCTACTACTGCCACAGCAGGGATAAGCCAGAACATAGCTCTTGCTAAATGTGATTGGACAGAACATTTATCTCCTGAGGGCTTCAAGTACTACTACAATAGTGTGACTGGTGAAAGTCGGGTAAGAAGTTAATGAGTTGCAATTATGTTTCCTGTTTTTTTTTACTTGTGGAACTAAAGTTTTCTGGAATTAACCTATAGTGGGAGAAACCGGAGGAGTTGGCATTATCTGAACAGCAAAAGCAACAGCGAAGGCTACCTAGTCAGCACTCACAAACTCAGTCACAATCTTCAATGATATCTTCCCAGCAAGTTCCACAAATTCAACAGGCTCAGGCTCATAGTCACTTCCAAGGACAGATTCTCCAGCAGCAACAAATGC…	-	-	-
SVP-F5	Mol Breeding 39:43	ALB09	34.4	-	AAGCCGAGTCAGTTGTTCCA	TGGCGTGGGATTTAGCTAAGT	LC434177	LC434178	AAGCCGAGTCAGTTGTTCCATCTTTGCAGGCTAAACAGGCACCAATACCAATATTCCAACATCAACACTTCCAATAAGGAAAGAAAAATCCACTAAGTACAATTCACAACCATTTTCCTTACTTAGCTAAATCCCACGCCA	AAGCCGAGTCAGTTGTTCCATCTTTGCAGGCTAAACAGGCACCAATACCAATATTCCAACATCAACACTTCCAATAAGGAAAGAAAAATCCACCAAGTACAATTCACAACCATTTTCCTTACTTAGCTAAATCCCACGCCA	-	-	-
FTc2-F4	Mol Breeding 39:43	ALB09	96	-	AATGCAGTTCATAAGAAATATGGAC	GAACTGGTGATCTCGATTAATTCA	LC434155	LC434156	AATGCAGTTCATAAGAAATATGGACTCCTTAATTTTCACCCTTGGTATTCATCTGGGTATGAGTCAAAGTAATCCAAACTCTAACCATCAAAACAATTTCGCCAAACACACAATATGGAATCCCAAATATGAATATAGTGGTACTTGAATTAATCGAGATCACCAGTTC	AATGCAGTTCATAAGAAATATGGACTCCTTAATTTTCACCCTTGGTATTCATCTGGGTATGAGTCAAAGTAATCCAAACTCTAACCATCAAAACAATTTCGCCAAACACACAATATGGAATCCCAAATATGAATATAGTGGTACATGAATTAATCGAGATCACCAGTTC	-	-	-
CO-F1	Mol Breeding 39:43	ALB10	15.1	-	CATGACACTGCTAATGCCATCAG	AAGTATTCATCACCTTCCCCACC	LC434127	LC434128	CATGACACTGCTAATGCCATCAGGACTGTGGCATGCAGTAACTGGGCGCCTCGCATGTGCGACACATGTCGTGCTGCGACATGCACTGTGTTCTGCCGCGTGGACTCTGCATACCTATGTGCAGGATGTGATGTCAGAGTCCACGCGGTAAACCACTTGGCGTTGCAGCACGAACGCGTGTGGGTGTGCGAGGCATGCGAGCGCGCCCCTGCAGAGTTTCTCTGCAAAGCGGACGCAGCATCACTTTGCTCGTCTTGTGATGCTGACATCCACTCTGCTAACCTTCTTGCCAGCCGTCACCACCGCGTGCCCATCATGCCCATCTCTGGGTTCCTCTATGGCCCTCCCGCCACCCAAGAGGGTGGTGGGTTTATGAGGGGCCGGGGTTGTCACGGCGGC…	CATGACACTGCTAATGCCATCAGGACTGTGGCATGCAGTAACTGGGCGCCTCGCATGTGCGACACATGTCGTGCTGCGACATGCACTGTGTTCTGCCGCGTGGACTCTGCATACCTCTGTGCAGGATGTGATGTCAGAGTCCACGCGGTAAACCACTTGGCGTTGCAGCACGAACGCGTGTGGGTGTGCGAGGCATGCGAGCGCGCCCCTGCAGAGTTTCTCTGCAAAGCGGACGCAGCATCACTTTGCTCGTCTTGTGATGCTGACATCCACTCTGCTAACCTTCTTGCCAGCCGTCACCACCGCGTGCCCATCATGCCCATCTCTGGGTTCCTCTATGGCCCTCCCGCCACCCAAGAGGGTGGTGGGTTTATGAGGGGCCGGGGTTGTCACGGCGGC…	2.08	1.31	1.47
FRI-F1	Mol Breeding 39:43	ALB11	37.8	-	CCTTCTCTCTCAGCAACAATCATTA	TCAGAGACTTCTCCGCTTCTTTATC	LC434147	LC434148	CCTTCTCTCTCAGCAACAATCATTAGGTTTCCCCTTTCTCTTTTCTTCATCATCGCAACACAATTCTCTATTTTCCTATAACAATTTCACTTTTCTCTTCTCTCACATTTCTTCTTCGATGTCTACTCCTTCCACTGTTCTCAATCTCAAAGTAGAATCCCAAAACATCACCGACTCTTTTCCACCGGAAAACGCCGTCGCCGATATAACCAAATCGGTTAATGAACTTGGAAGCCTTGCTTCTGCTATACAAGCTTTCAAGAACAGGTACGAGGAGCTTCAGAATCATCTCGATTTCATCACACAAGCCATCGATGAAGAATCCAAAGAAATCACCGCTTCTTTATGCTTGAATCAAGGAACTGTAACCACCACCGCCACCGATGGTGATGTCGCCGT…	CCTTCTCTCTCAGCAACAATCATTAGGTTTCCCCTTTCTCTTTTCTTCATCATCGCAACACAATTCTCTATTTTCCTATAACAATTTCACTTTTCTCTTCTCTCACATTTCTTCTTCGATGTCTACTCCTTCCACTGTTCTCAATCTCAAAGTAGAATCCCAAAACATCACCGACTCTTTTCCACCGGAAAACGCCGCCGCCAATATAACCAAATCGGTTAATGAACTTGGAAGCCTTGCTTCTGCTATACAAGCTTTCAAGAACAGGTACGAGGAGCTTCAGAATCATCTCGATTTCATCACACAAGCCATCGATGAAGAATCCAAAGAAATCACCGCATCTTTATGCTTGAATCAAGGAACTGTAACCACCACCGCCACCGATGGTGATGTCGCCGT…	-	-	-
SKIP1-F2	Mol Breeding 39:43	ALB13	74.2	3/ALB13 (81.0 cM)	TAAGGTTCTCAAGAGAAATCTCATGAA	ATTTAGGTACTCATCAGGAACAATTCCCGTG	LC434173	LC434174	TAAGGTTCTCAAGAGAAATCTCATGAATTGGCTTGATCCTTCCCAACCCACGGGAATTGTTCCTGATGAGTACCTAAAT	TAAGGTTCTCAAGAGAAATCTCATGAATTGGCTTGATCCTTCCCAACACACGGGAATTGTTCCTGATGAGTACCTAAAT	7.75	9.38	7.54
SEP3-F1	Mol Breeding 39:43	ALB13	99.3	4/ALB13 (96.2 cM)	TATTTAAGGATGAAGCACCA	TTTTTATCATTTCATTTTCTTCG	LC434171	LC434172	TATTTAAGGATGAAGCACCAACATTTACGTCATCATCAGTACCTGTCTGGCTGTATCTGTAAGAATAAAACATATACTTTGTAGCTAGAACACTATATGTTTATGGAAAAGAAATAATACATCGAAGAAAATGAAATGATAAAAA	TATTTAAGGATGAAGCACCAACATTTACGTCATCATCAGTACCTGTCTGGCTGTATCTGTAAGAATAAAACATATACTTTGTAGCTAGAACACTATATGTTTATGGAAAAGAAATAATACAACGAAGAAAATGAAATGATAAAAA	0.66	3.72	2.7
FTc1-F4	Mol Breeding 39:43	ALB14	53.9	-	TGTGCAGATTTAACAGCAACTTCTT	TTTGGTTTCCCTCTATCTTAAACTAT	LC434153	LC434154	TGTGCAGATTTAACAGCAACTTCTTTGTGTATGAATCCCTCAATGGAAGAAACTTCAGCTTCTTTTCTTTGCCTTCTTAACCAGGTGCAACACTAAAAATAATAATAAAATTGTGGGACCCTTTTTCTATCAACAAAATGAATGGTGTAAACCCTAAGTTTCAAACTTTAGTTTTAAAATAAGATTCCACATAATATAATCAATAATTTTAATTTGATAACTAATATATAACAATTTTAAGTTGTCTTTTAAAGCTAAGATGGATATAGTTTAAGATAGAGGGAAACCAAA	TGTGCAGATTTAACAGCAACTTCTTTGTGTATGAATCCCTCAATGGAAGAAACTTCAGCTTCTTTTCTTTGCCTTCTTAACCAGGTGCAACACTAAAAATAATAATAAAATTGTGGGACCCTTTTTCTATCAACAAAATGAATGGTGTAAACCCTAAGTTTCAAACTTTAGTTTTAAAATAAGATTCCACATAATATAATCAATAATTTTAATTTGATAACTAATATATAACAATTTTAAGTTGTCTTTTAAGTTTTAAAGCTAAGATGGATATAGTTTAAGATAGAGGGAAACCAAA	3.47	6.22	3.29
FRI31-F1	Mol Breeding 39:43	ALB16	5.8	5/ALB16 (2.2 cM)	CTGAACCCGATCTGAGAGGTC	AGTCTGTGATGGAGCAGCTTG	LC434145	LC434146	CTGAACCCGATCTGAGAGGTCTTGCTCTTTAGAAGCAACTGCTGCCTGTCTCTCAGCAAGTAGTTTATGAATTCCTGATTCTTTCTCTTCATGCTCCCTCTCCTTAGCCTCGAACTCTTCAAGTTTCTTCTTCCACATTGCCTCGAGGTTATGGAAATGTTGCTCAATTTCAACCCACTTAATCTTACACTCAAAAGCCTCCTTGCTAGCTTCCAATTCAAGAAATGCCTCAGCAAGCTGCTCCATCACAGACT	CTGAACCCGATCTGAGAGGTCTTGCTCTTTAGAAGCAACTGCTGCCTGTCTCTCAGCAAGTAGTTTATGAATTCCTGATTCTTTCTCTTCATGCTCCCTCTCCTTAGCCTCGAACTCTTCAAGTTTCTTCTTCCACATTGCCTCGAGGTTATGGAAATGTTGCTCAATTTCAACCCACTCAATCTTACACTCAAAAGCCTCCTTGCTAGCTTCCAATTCAAGAAATGCCTCAGCAAGCTGCTCCATCACAGACT	-	-	-
LD-F1	Mol Breeding 39:43	ALB18	31.5	-	AGCTTCCAGCCTATTAGTGGTTTTA	CTTGCTCTCTCCAATGAATGTTCAA	LC434161	LC434162	AGCTTCCAGCCTATTAGTGGTTTTAGAGGGAAGCAGTGGAGATTTCTTTTCTTCAATTTTGGATAGGACTTTAGAAGAGCAAGTTGAAATACTAGCCTGATTTGTCTGAGGTTTATTCAGACCATTAACCTGTGCTCCTTTACTTTCTTTTGAAGGACCAGTTTTCCCATACTTACTCTGCATAAATAAGGCACGCATTTTTGCTTTCTGGATATCATCAGCAGACATGGGGCGGCCTTGACTTACAGGCTGTGCTCTTGTTTTCTGTGGGCTTCTGCTTGCTGTTTTTTGGCCTGGCTGTTCCACCAATTGCACTTTTCTGCGCTCTCGATATTCTGTTACGGGTTAAGGAATATGACAAGAGATATAGCCAACAATAAGCATCACTAAACAACTAGC…	AGCTTCCAGCCTATTAGTGGTTTTAGAGGGAAGCAGTGGAGATTTCTTTTCTTCAATTTTGGATAGGACTTTAGAAGAGCAAGTTGAAATACTAGCCTGATTTGTCTGAGGTTTATTCAGACCATTAACCTGTGCTCCTTTACTTTCTTTTGAAGGACCAGTTTTCCCATACTTACTCTGCATAAATAAGGCACGCATTTTTGCTTTCTGGATATCATCAGCAGACATGGGGCGGCCTTGACTTACAGGCTGTGCTCTTGTTTTCTGTGGGCTTCTGCTTGCTGTTTTTTGGCCTGGCTGTTCCACCAATTGCACTTTTCTGCGCTCTCGATATTCTGTTACGGGTTAAGGAATATGACAAGAGATATAGCCAACAATAAGCATCACTAAACAACTAGC…	-1.24	-0.87	-2.36
ESD4-F7	Mol Breeding 39:43	ALB18	71.6	-	CCCTAACCAACGGTAGCTTGATAT	TGTGCTTTTTCACCCCTCTC	LC434133	LC434134	CCCTAACCAACGGTAGCTTGATTTTGGGGTATCGATAAATTCTCGAAACAACAGTACCATTGTATGATGATGACGAAACCGGTGGGGCGGGTGAGGATGATGAAAATTTGGGTCTTTTATAGGAAGAAGAATTGGGAATGGGAGATTGAGAATTATTGGGTTCATTAAGGTTCATGCATTCTTGGGGGCGCTTACGGTGAGAAGTGATGACACCCATTGATGGAAAGGGAATCGGAGAGGGGTGAAAAAGCACA	CCCTAACCAACGGTAGCTTGATTTCGGGGTATCGATAAATTCTCGAAACAACAGTACCATTGTATGATGATGACGAAACCGGTGGGGCGGGTGAGGATGATGAAAATTTGGGTCTTTTATAGGAAGAAGAATTGGGAATGGGAGATTGAGAATTATTGGGTTCATTAAGGTTCATGCATTCTTGGGGGCGCTTACGGTGAGAAGTGATGACACCCATTGATGGAAAGGGAATCGGAGAGGGGTGAAAAAGCACA	-	-	-
ESD4-F8	Mol Breeding 39:43	ALB18	71.6	-	CTGCGCTTCTCCTGTAGTTCAATTT	AGACCTTGAAACCGATAGTCATAATAG	LC434135	LC434136	CTGCGCTTCTCCTGTAGTTCAATTTCAAACTTGAGTCTCTCTGTTGCCGGCTCCCTTCCTCTAACAGACTCTAGCAACTTCTTATAAACAAGAACACTCGAAAAATCATGCTCTTGACTCAAATCAAAAGAGTCCAACTTTTTTTCAGCAATGACTAACCTATTCTTCAAGTTACTATTAATCAACTCAGAATCAACTAAGGAAATTGACTTAGCCTGAATTCCATCATCCACAACCATTGGATCCAAATCATGTATCTCAACATCACCATCTTCGACAACACGAACCTCCTCTTTGATACTTGAATCTTTCCAAACCTTATACCTATTATGACTATCGGTTTCAAGGTCT	CTGCGCTTCTCCTGTAGTTCAATTTCAAACTTGAGTCTCTCTGTTGCCGGCTCCCTTCCTCTAACAGACTCTAGCAACTTCTTATAAACAAGAACACTCGAAAAATCATGCTCTTGACTCAAATCAAAAGAGTCCAACTTTTTTTCAGCAATGACTAACCTATTCTTCAAGTTACTATTAGTCAACTCAGAATCAACTAAGGAAATTGACTTAGTCTGAATTCCATCATCCACAACCATTGGATCCAAATCATGTATCTCAACATCACCATCTTCGACAACACGAACCTCCTCTTTGATACTTGAATCTTTCCAAACCTTATACCTATTATGACTATCGGTTTCAAGGTCT	-	-	-
TFL1-FT4-F2	Mol Breeding 39:43	ALB20	24.4	-	CTAGGGCCAGGAACATCAGG	ACATTCTCTCATTTCCCAGCAGA	LC434179	LC434180	CTAGGGCCAGGAACATCAGGGTCTGTCATGACCTGCAATAAAAAAAAGGTGACATTTAGCTTAATGATTCGGTCTTTAATTTGTAAGTGGCAATATTCAAATAATAGGGGAATATAGTGCTGAAGATTATCTATTTCCAAGTTGGTGTCATAAGTCTTGTCCCGCCGAATAGTATAACGTCATGTATGCCATTAAAAATATATATTCTTATGTGTACTTTCATTCCCTTGGCAGAAACAAAAATAGTACATTATGTGACATTATATTATTGGGTGGGACAGGATTGGGGACACCAACTTCGGACAGGTGATCTCCATCCTTAACCAGCAGGCAAAAACAGCTTAAACTTTTTTTCTTTTAAGCAAAAAAGAATAAGAGAAAAAGAGATCATATGTGATT…	CTAGGGCCAGGAACATCAGGGTCTGTCATGACCTGCAATAAAAAAAAGGTGACATTTAGCTTAATGATTCGGTCTTTAATTTGTAAGTGGCAATATTCAAATAATAGGGGAATATAGTGTGACTGATTGTAGAAAACTAGGTCTGAAGATTATCTATTTCCAAGTTGGTGTCATAAGTCTTGTCCCGCCGAATAGTATAACGTCATGTATGCCATTAAAAATATATATTCTTATGTGTACTTTTATTCCCTTGGCAGAAACAAAAATAGTATATTATGTGACATTATATTATTGGGTGGAACAAGATTGGGGACACCAACTTCGGACAGGTGATCTCCATCTTTAACCTGGAGGCAAAAACAGCTCAAACTTTTTTTCTTTTAAGCAAAAAAGAATAAG…	-	-	-
TFL1-FT6-F1	Mol Breeding 39:43	ALB20	24.4	-	GTGCTGATTTGAGGTCCTTCTTTAC	CTCATATAAGGATCACTAGGGCCAG	LC434181	LC434182	GTGCTGATTTGAGGTCCTTCTTTACNNNNNNNNNNNNNNNNNNNNNNNNNNNTTGGAATCATATGATCTCTTTTTCTCTTATTCTTTTTTGCTTAAAAGAAAAAAAGTTTAAGCTGTTTTTGCCTGCTGGTTAAAGATGGAGATCACCTGTCCGAAGTTGGTGTCCCCAATCCTGTCCCACCCAATAATATAATGTCACATAATGTACTATTTTTGTTTCTGCCAAGGGAATGAAAGTACACATAAGAATATATATTTTTAATGGCATACATGACGTTATACTATTCGGCGGGACAAGACTTATGACACCAACTTGGAAATAGATAATCTTCAGCACTATATTCCCCTATTATTTGAATATTGCCACTTACAAATTAAAGACCGAATCATTAAGCTAAA…	GTGCTGATTTGAGGTCCTTCTTTACNNNNNNNNNNNNNNNNNNNNNNNNNNNTTGGAATCACATATGATCTCTTTTTCTTATTCTTTTTTGCTTAAAAGAAAAAAAGTTTGAGCTGTTTTTGCCTCCAGGTTAAAGATGGAGATCACCTGTCCGAAGTTGGTGTCCCCAATCTTGTTCCACCCAATAATATAATGTCACATAATATACTATTTTTGTTTCTGCCAAGGGAATAAAAGTACACATAAGAATATATATTTTTAATGGCATACATGACGTTATACTATTCGGCGGGACAAGACTTATGACACCAACTTGGAAATAGATAATCTTCAGACCTAGTTTTCTACAATCAGTCACACTATATTCCCCTATTATTTGAATATTGCCACTTACAAATT…	-	-	-
FKF-F2M	Mol Breeding 39:43	ALB20	64.5	-	TGGGTGCCCTCCGAGATTTGCTT	TTCGAATAAAGCAAAATATGAGGAAATC	LC434139	LC434140	TGGGTGCCCTCCGAGATTTGCTTGGGGACATAGTACATGTATTGTTGGAGGAACAAGAGCAATTGTGTTAGGCGGTCAAACCGGGGAGGAGTGGATGCTAGGTGACCTCCATGAACTTTCCTTGGCAAGTTCTGCCATATAGATCCAGTGAATAAACTGCATGGTTTAGTGTAGGGGATGGATGCTACGAGGCTCTGATTAAACTTGTAAAATCATTCTGAGCACAAGTAGGTGGCAAAAGGTTTGTGTTGGTCACTGGTGACAAGCATTGCTCTATTCTGACCGTTTGTGTATAAGTTGTATTCACATTCGATTTTCTTTTATGATTGGTTCTGGCTTGAGAAGAACTTCTCAGTGAGTGACACAATCTCATGTTTGTTCTTGTGACGTTGTGTGAAA…	TGGGTGCCCTCCGAGATTTGCTTGGGGACATAGTACATGTATTGTTGGAGGAACAAGAGCAATTGTGTTAGGCGGTCAAACCGGGGAGGAGTGGATGCTAGGTGACCTCCATGAACTTTCCTTGGCAAGTTCTGCCATATAGATCCAGTGAATAAACTGCATGGTTTAGTGTAGGGGATGGATGCTACGAGGCTCTGATTAAACTTGTAAAATCATTCTGAGCACAAGTAGGTGGCAAAAGGTTTGTGTTGGTCACTGGTGACAAGCATTGCTCTATTCTGACCGTTTGTGTATAAGTTGTATTCACAATCGATTTTCTTTTATGATTGGTTCTGGCTTGAGAAGAACTTCTCAGTGAGTGACACAATCTCATGTTTGTTCTTGTGACGTTGTGTGAAA…	-	-	-
ELF1-F1	Mol Breeding 39:43	ALB21	91.4	-	GAGGAGATGGAGGCTGAAATTGA	TTTTCCTCCCATCTTACTCCTGC	LC434129	LC434130	GAGGAGATGGAGGCTGAAATTGATGAAGATGAGGAACCTCTTGTATATGAAANNNNNNNNNNTGTGCCTTATTTCTCCATTTTGCTGCCTAATGTTTGAGATTGTCGTTCATTTATGTTTANNNNNNNNNNNNNNNNNNNNNNNNNNNNNNNNNNNNNNNNNNNNNNNNNNNNNNNNNNNNNNNNNNNNNNNNNNNNNNNNNNNNNNNNNNNNNNNNNNNNNNNNNNNNNNNNNNNNNNNNNNNNNNNNNNNNNNNNNNNNNNNNNNNNNNNNNNNNNNNNNNNNNNNNNNNNNNNNNNNNNNNNNNNNNNNNNNNNNNNNNNNNNNNNNNNNNNNNNNNNNNNNNNNNNNNNNNNNNNNNNNNNNNNNNNNNNNNNNNNNNNNNNNNNNNNNNNNNNN…	GAGGAGATGGAGGCTGAAATTGATGAAGATGAGGAACCTCTTGTATATGAAANNNNNNNNNNTGTGCCTTATTTCTCCATTTTGCTGCCTAATGTTTGAGATTGTCGTTCATTTATGTTTANNNNNNNNNNNNNNNNNNNNNNNNNNNNNNNNNNNNNNNNNNNNNNNNNNNNNNNNNNNNNNNNNNNNNNNNNNNNNNNNNNNNNNNNNNNNNNNNNNNNNNNNNNNNNNNNNNNNNNNNNNNNNNNNNNNNNNNNNNNNNNNNNNNNNNNNNNNNNNNNNNNNNNNNNNNNNNNNNNNNNNNNNNNNNNNNNNNNNNNNNNNNNNNNNNNNNNNNNNNNNNNNNNNNNNNNNNNNNNNNNNNNNNNNNNNNNNNNNNNNNNNNNNNNNNNNNNNNNN…	1.46	2.25	1.87
ELF3-F1	Mol Breeding 39:43	ALB22	35.5	-	TTCTCTTCCGAAGCCATCTACTC	TGACGCTGCTTGATTCATAATCG	LC434131	LC434132	TTCTCTTCCGAAGCCATCTACTCCTAATCTCGCCCTGGAAGTTGTTGTTAAACCTCAGCTACAAAATCTTAAGCGCAAAGATGATTCTGAGAAGCTAAACCATAATAAAATGGAATGTTCCGCTGAGAATGCAGTTGGAAAAAGATCTTGTTCGACCCCGAAAAATGGTAGCCACCATTCTAATTACACCCCCTTCGCTGGAAATCTACACCAAACAAAAGCAGCTGCTGATAATAGAATGGGTTCCTGTGGTTTCAACCAGTCACCTGGACATCAATGGTTAATACCTGTTATGACTCCTTCTGAAGGTCTTGTCTACAAGCCGTATCCGGGGCCTGCATTCTTAGGAACGATGTGTGGAGGAGGATGTGGGCCCTTTGGGCCGGGTCCTCCAGGTGG…	TTCTCTTCCGAAGCCATCTACTCCTAATCTCGCCCTGGAAGTTGTTGTTAAACCTCAGCTACAAAATCTTAAGCGCAAAGATGATTCTGAGAAGCTAAACCATAATAAAATGGAATGTTCCGCTGAGAATGCAGTTGGAAAAAGATCTTGTTCGACCCCGAAAAATGGTAGCCACCATTCTAATTACACCCCCTTCGCTGGAAATCTACACCAAACAAAAGCAGCTGCTGATAATAGAATGGGTTCCTGTGGTTTCAACCAGTCACCTGGACATCAATGGTTAATACCTGTTATGACTCCTTCTGAAGGTCTTGTCTACAAGCCGTATCCGGGGCCTGCATTCTTAGGAACGATGTGCGGAGGAGGATGCGGGCCCTTTGGGCCGGGTCCTCCAGGTGG…	-	-	-
FPA-F5	Mol Breeding 39:43	ALB24	25.9	-	CTGTCTTTGCCCAATCAATTGTAGA	TGGTGTTGCGAAGTGTATTGATAAC	LC434143	LC434144	CTGTCTTTGCCCAATCAATTGTAGATGATTGTGTACCTGCAGGGAGTAAGGATGTTAACGTTGCAATAAGCTCCGGTGTCAATGTAACTCCAGCTTGCAAAGTAGAAACTGCGTGAGAAGGAGCATAATCAGGAGGAACAGAATGAACTGAAGGAGGGCCAGTTGTGGTGGGATGAAATGGTTTTGGAGGAAGCTTAGAATCCGCATGCGACATTCTGTTATAATCCATTGTCAAAACCTGCTGCCCATTTGCAGAGATAAAACCATACTCAGTTTGCGAAGGAGGAACCTGCTGCATGTACTGAGTTGAGGGTGCAGGCAAATGCATTGCTTGTTGCATTGACACAATACTTGGAAAGTTAAGAATCACGCCGTATAGACGTTCAGGTCCTGTGACTT…	CTGTCTTTGCCCAATCAATTGTAGATGATTGTGTACCTGCAGGGAGTAAGGATGTTAACGTTGCAATAAGCTCCGGTGTCAATGTAACTCCAGCTTGCAAAGTAGAAACTGTGTGAGAAGGAGCATAATCAGGAGGAACAGAATGAACTGAAGGAGGGCCAGTTGTGGTGGGATGAAATGGTTTTGGAGGAAGCTTAGAATCCGCATGCGACATTCTGTTATAATCCATTGTCAAAACCTGCTGCCCATTTGCAGAGATAAAACCATACTCAGTTTGCGAAGGAGGAACCTGCTGCATGTACTGAGTTGAGGGTGCAGGCAAATGCGTTGCTTGTTGCATTGACACAATACTTGGAAAGTTAAGAATCACGCCGTATAGACGTTCAGGTCCTGTGACTT…	-	-	-
TP23903	J Appl Genet 61:531-545	ALB02	0	1/ALB02 (2.2 cM)	CAGCAATATTGAGAGCAACCAA	TGTATTATATGGCTTTGATTGTGTC	LC416317	LC416316	CAGCAATATTGAGAGCAACCAAGATGCCAATTCGGGGATGACACAATCAAAGCCATATAATACA	CAGCAATATTGAGAGCAACCAAGATGCCAATTCGGGGACGACACAATCAAAGCCATATAATACA	1.57	2.18	2.17
TP222136	J Appl Genet 61:531-545	ALB02	2.83	1/ALB02 (2.2 cM)	CTTCACCCAGTCTCTATCTGCAC	AATGAGCATGCTTAATCTTGTTGCA	LC416311	LC416310	CTTCACCCAGTCTCTATCTGCACCCTCCTTGTGCAAAAAGATAACTTTATGAACGTATTACTTTTAATGGTCAAAGAAAATATTATTTTATCATTGGGAATTGTGGAAGTAGCAGCGTTATAGTTATTTGTGCCTATTATTCCTTACCGTACATATAAAGAGAAATAGCGTACCTTCACAAGGCTTGCAACAAGATTAAGCATGCTCATT	CTTCACCCAGTCTCTATCTGCACCCTCCTTGTGCAAAAAGATAACTTTATGAACGTATTACTTTTAATGGTCAAAGAAAATATTATTTTATCATTGGGAATTGTGGAAGTAGCAGCGTTATAGTTATTTGTGCCTATTATTCCTTACCGTACATATAAAGAGAAATAGCTTACCTTCACAAGGCTTGCAACAAGATTAAGCATGCTCATT	-	-	-
TP272531	J Appl Genet 61:531-545	ALB02	3.17	1/ALB02 (2.2 cM)	TCATTGTCATAGATAATTGCAGCT	GAGCCACTTGATGCATGTACA	LC416321	LC416320	TCATTGTCATAGATAATTGCAGCTTTGTATCCAGCTCTTTGTGCACTTCTGACCTTTTCCTCAAAGCTACATCCTCCTCTAACCACCAAAACAAAAGGTGAACTCACATTTGAAAGATGTTCAGCTTTATTTGTCAGTTCTGTACATGCATCAAGTGGCTC	TCATTGTCATAGATAATTGCAGCTTTGTATCCAGCTCTTTGTGCACTTCTGAGCTTTTCCTCAAAGCTACATCCTCCTCTAACCACCAAAACAAAAGGTGAACTCACATTTGAAAGATGTTCAGCTTTATTTGTCAGTTCTGTACATGCATCAAGTGGCTC	-	-	-
TP47110	J Appl Genet 61:531-545	ALB02	3.52	1/ALB02 (2.2 cM)	TTAGCTGGTTTAATGTGGTGGCACTCA	AAAGAGCAAACCAAGCCTATCT	LC416341	LC416340	TTAGCTGGTTTAATGTGGTGGCACTCAAACTATAGGAATGTTCAAGATAGGCTTGGTTTGCTCTTT	TTAGCTGGTTTAATGTGGTGGCACTCAGACTATAGGAATGTTCAAGATAGGCTTGGTTTGCTCTTT	1.94	1.83	2.42
TP56963	This study	ALB02	96.39	2/ALB02 (100.2 cM)	TGCTCGAAATGCCCAAATCCATCA	TTGATGCTCGCAGTGAAGAGATAA			TGCTCGAAATGCCCAAATCCATCAACAGAAGATTGGCAGCAGAGGTTTTACAGTGGCTACAATTTCTGAAGATCACCAAGAGTCTAATACTGCTTCAGGTTAAAATTTTAAACGTTAAAATGTTCATGATTTTTACTTCTTTCTTGCTTTCTTATGACCCTACGTCTTCAGTAAATAGTATTAACGTTCTATCTCAAAATCAATAAAACATGAGAGCAGTAGTCCAACATGTATTTAAACAATCCTTGGAGAATGAGGCAAGCGATGTGAGACTAATTTCCCAACATGCCCTCTCCACAAAAGCCTGCCGGACTTGGTCAATGGTTACCTTTGATCTATGGCTAAAGGCCATCTTTTGGCCCATGGAAATTAGAAAGAAGTTGGACTCTGGCTCTGATA…	TGCTCGAAATGCCCAAATCCATCAACAGAAGATTGGCAGCAGAGGTTTTACAGTGGCTACAATTTCTGAAGATCACCAAGTGTCTAATACTGCTTCAGGTTAAAATTTTAAACGTTAAAATGTTCATGATTTTTACTTCTTTCTTGCTTTCTTATGACCCTACGTCTTCAGTAAATAGTGTTAACGTTCTATCTCAAAATCAATAAACCATGAGAGCAGTAGTCCAACATATATTTAAACAATCCTAGGAGAATGAGACAAGCGATGTGAGACTAATTTCCCAACATGCCCTCTCCACAAAAGCCTGCCGGACTTGGTCAATGGTTACCTTTGATCTATGGCTAAAGGCCATCTTTTGGCCCATGGAAATTAGAAAGAAGTTGGACTCTGGCTCTGATA…	-	-	-
TP235608	This study	ALB02	96.8	2/ALB02 (100.2 cM)	GTAGTCCCAAACATGAACGCAG	TCATCTGCATACTTGTCATTCCT			GTAGTCCCAAACATGAACGCAGCTCAAGCCCAAATCCCTTAAGGGATGATTCCGTTAGAGTCTCTGACCATCATTCAAGGAAGTATGATGGTAGGGAACCAGACCGGCAATATGGCAAAAATTACTATGGCCGAAACAGTGATTCTTTTAGGCATTCTGATAGGCAGTCATCAAGGAGCTCCTATGGTCATTCTAGGAATGACAAGTATGCAGATGA	GTAGTCCCAAACATGAACGCAGCTCAAGCCCAAATCCGTTAAGGGATGATTCCGTTAGAGTCTCTGACCATCATTCAAGGAAGTATGATGGTAGGGAACCAGACCGGCAATATGGCAAAAATTACTATGGCCGAAACAGTGATTCTTTTAGGCATTCTGATAGGCAGTCGTCAAGGAGCTCCTATGGTCATTCTAGGAATGACAAGTATGCAGATGA	3.23	7.88	3.1
TP94353	This study	ALB02	100.18	2/ALB02 (100.2 cM)	CAGCATTTATGTTGTTGGGACA	GGAACCCTGCAATTTGGATAAGG			CAGCATTTATGTTGTTGGGACAATCAAGTGCAACACTCCTTGGAAGATTGTATTATGAGAAAGGTGGAAAGAGTAAATGGTTAGGGACCCTTATCCAAATTGCAGGGTTCC	CAGCATTTATGTTGTTGGGACAATCAAGTGCAACACTCCTTGGAAGATTGTACTATGAGAAAGGTGGAAAGAGTAAATGGTTAGGGACCCTTATCCAAATTGCAGGGTTCC	2.67	3.16	2.33
TP278885	This study	ALB02	100.48	2/ALB02 (100.2 cM)	CCATTTGAATAGCTGCAAATCGCTTCCG	CCTTTGATTGTTGAAGCCTATGC			CCATTTGAATAGCTGCAAATCGCTTCCGGGAATTTCCATCCAAAAGATCGGCATTGAGCATTCGCAATCCAGATTGTATGAACAATCTTGCATAGGCTTCAACAATCAAAGG	CCATTTGAATAGCTGCAAATCGCTTCCGCGAATTTCCATCCAAAAGATCGGCATTGAGCATTCGCAATCCAGATTGTATGAACAATCTTGCATAGGCTTCAACAATCAAAGG	-	-	-
TP115697	This study	ALB02	100.48	2/ALB02 (100.2 cM)	TGGCTCCTGTTATGTCACTCA	TGAATTTGAGACAAACTCAGTGGTA			TGGCTCCTGTTATGTCACTCACAGCAACAATTTTCCCACCTTTTTCACTTATTAATTGTGCAGCCCAAGACCCCACATTTCCAAAACCCTGATCAAATTACACAACATGATACCACTGAGTTTGTCTCAAATTCA	TGGCTCCTGTTATGTCACTCACAGCAACAATTTTCCCACCTTTTTCACTTATTAATTGTGCAGCCCAAGACCCCACATTTCCAAAACCCTGATCAAATTACACAACATGGTACCACTGAGTTTGTCTCAAATTCA	-	-	-
TP114357	This study	ALB02	107.68	2/ALB02 (100.2 cM)	GCCATTCTGGATGGATAACCG	TGGACCATCAGCTGACTTCAA			GCCATTCTGGATGGATAACCGGACAATTAATGATCAGAATAAGGATTTCATTCCTTTAAATCATAATTCTGTGCCACTATATGATCGTGGATATGCTTTGGGATTGAAGTCAGCTGATGGTCCA	GCCATTCTGGATGGATAACCGAACAATTAATGATCAGAATAAGGATTTCATTCCTTTAAATCATAATTCTGTGCCACTATATGATCGTGGATATGCTTTGGGATTGAAGTCAGCTGATGGTCCA	-	-	-
TP100150	This study	ALB13	76.52	3/ALB13 (81.0 cM)	TATTGCAGCCAATCCATCACTC	ACTTTCTTCATCTGATGTTGACGA			TATTGCAGCCAATCCATCACTCCATCAAGAATATCCAACCACAGTTGTTCACTCCAAAATGTCTGATGGTTCCACGTCCAGTTATGAATATGAGGATGAAATGGAGGATGAATTTTATGATGCAATTGCTGGCGAATCGTCAACATCAGATGAAGAAAGT	TATTGCAGCCAATCCATCACTCCATCAAGAATATGCAACCACAGTTGTTCACTCCAAAATGTCTGATGGTTCCACGTCCAGTTATGAATATGAGGATGAAATGGAGGATGAATTTTATGATGCAATTGCTGGCGAATCGTCAACATCAGATGAAGAAAGT	1.26	0.94	1.61
TP288840	This study	ALB13	76.52	3/ALB13 (81.0 cM)	CTGCAATATATTCTTTAAGACCTGAT	CTGGAGGAATCTAATATAAGTTGTT			CTGCAATATATTCTTTAAGACCTGATCCATTATTTAACAACTTATATTAGATTCCTCCAG	CTGCAATATATTCTTTAAGACCTGATTCATTATTTAACAACTTATATTAGATTCCTCCAG	-	-	-
TP3177	This study	ALB13	76.85	3/ALB13 (81.0 cM)	CGTGACAAGTGTTCCACGG	ATCTGGTTGGAAGCTTGTTGTG			CGTGACAAGTGTTCCACGGGAGGCTGGTGACATGAATCCAAGTGCAGCAAACAATATTGTCACCACAGCCATCCCAAGAATCTGAACTCCATTGCCAACCATTATGCACAACAAAGAAGGATTCGATGGGGCACGGAAAACATCCCCCACAACAAGCTTCCAACCAGAT	CGTGACAAGTGTTCCACGGGAGGCTGGTGACATGAATCCAAGTGCAGCAAACAATATCGTCACCACAGCCATCCCAAGAATCTGAACTCCATTGCCAACCATTATGCACAACAAAGAAGGATTCGATGGGGCACGGAAAACATCCCCCACAACAAGCTTCCAACCAGAT	-	-	-
TP360542	This study	ALB13	86.43	3/ALB13 (81.0 cM)	GAGCCAGGAATAAGGGTGGTG	ACTGGATAGTAAAACCCCATAGAATTACT			GAGCCAGGAATAAGGGTGGTGCCAATTAGAACCATGGTTGCTGCCGTACCAGGTCCCATAAGTCGCTTGCCTTTAGAACAATCGAGTAATTCTATGGGGTTTTACTATCCAGT	GAGCCAGGAATAAGGGTGGTGCCAATTAGAACCATGGTTGCTGCCGTACCAGGTCCCATAAGTCGCTTGCCTTTAGAACAATCTAGTAATTCTATGGGGTTTTACTATCCAGT	-	-	-
TP345457	This study	ALB13	96.16	4/ALB13 (96.2 cM)	CACAATTCACTACCACAGATCAACC	GATTTCGTCCATCCAAGGATTCTTC			CACAATTCACTACCACAGATCAACCAACAAGAATAGTCCTGAGAAAAAAACCCACAGCAATCGAAGCTCTTAACAAAAGCTGCCCGTGGCATCAGAATAAAATTCCTAATGCAGAATCTGATAAAAGTAAAGTATTACAACAGGTCAGAGAATTTCACCAGTCCAACACATACAGAGCTACACCTAATATTGATACATAAAGTTTCATAGTTTATATTGCAAACACCCTTGGGACTTCAACAGGGAACTGGTGGATTTCGTCCATCCAAGGATTCTTC	CACAATTCACTACCACAGATCAACCAACAAGAATAGTCCTGAGAAAAAAACCCACAGCAATCGAAGCTCTTAACAAAAGCTGCTCCTGGCATCAGAATAAAATTCCTAATGCAGAATCTGATAAAAGTAAAGTATTACAACAGGTCAGAGAATTTCACCAGTCCAACACATACATAGCTACACCTAATATTGATACATAAAGTTTCATAGTTTATATTGCAAACACCCTTGGGACTTCAACAGGGAACTGGTGGATTTCGTCCATCCAAGGATTCTTC	2.18	2.38	0.87
TP11750	This study	ALB13	97.38	4/ALB13 (96.2 cM)	AAAACCACTGAAAAGGTTCCACA	CAGGCGATAATATACTCGTCCA			AAAACCACTGAAAAGGTTCCACAACATATAAAATGGAGCAGCAATTATGGCAGCAACATTGTGATTTGGTGTGACCGCCGTTGTCATCATTCCATAGAAGGTGAAATATAGCATAGTAAAATACGTGAAGAATAAGTACCAAATGAACTTATCAACAGTCCAGACAAAGGCACCCAAGGAATAGAATATGGACGAGTATATTATCGCCTG	AAAACCACTGAAAAGGTTCCACAACATATAAAATGGAGCAGCAATTATGGCAGCAACATTGTGATTTGGTGTGACAGCCGTTGTCATCATTCCATAGAAGGTGAAATATAGCATAGTAAAATACGTGAAGAATAAGTACCAAATGAACTTATCAACAGTCCAGACAAAGGCACCCAAGGAATAGAATATGGACGAGTATATTATCGCCTG	-	-	-
TP402859	This study	ALB13	99.28	4/ALB13 (96.2 cM)	CTGGTGGCAAAAGAAGCAGAA	AAAGCCAGGAAAGCACATTGG			CTGGTGGCAAAAGAAGCAGAATTTTCCGAGGGAGTTAATTTAGAAACGTTAACTTCCGAAGATGACATGCTTTTTGGTGGGCTGCGTCCATTTTGCATTGCGACTGCATCACCGGGTTTCCCCCCTTCAATATTATGTTTCTTTCCATTCAGGTTTCCTTGGTTAGCATCTGAAGTTCCAATGTGCTTTCCTGGCTTT	CTGGTGGCAAAAGAAGCAGAATTTTCCGAGGGAGTTAATTTAGAAACGTTAACTTCCGAAGATGACATGCTTTTTGGTGGGCTGCGTCCATTTTGCATTGCGACTGCATCATCGGGTTTCCCCCCTTCAATATTATGTTTCTTTCCATTCAGGTTTCCTTGGTTAGCATCTGAAGTTCCAATGTGCTTTCCTGGCTTT	1.81	4.77	2.15
TP2488	This study	ALB16	0.3	5/ALB16 (2.2 cM)	ACCTTGTTATTGATGCTAGCTTCT	TGTTTGAGGGAAGGCAGGTGGAAT			ACCTTGTTATTGATGCTAGCTTCTTCAGAAGTTGATGCAGCAAAATCAAATTTTGATCGTGATGTAATACATTCCACCTGCCTTCCCTCAAACA	ACCTTGTTATTGATGCTAGCTTCTTCAGAAGTTGATGCAGCAAAATCAAATTTTGATCGTGATGTAATAAATTCCACCTGCCTTCCCTCAAACA	-	-	-
TP86766	This study	ALB16	2.23	5/ALB16 (2.2 cM)	CAGCATGCAAGAAAGCTG	TCCTTTCTTCTCCTTCTCTTTC			CAGCATGCAAGAAAGCTGAGAGAAAGAGTTACTAACAACGAGGAAAGAGAAGGAGAAGAAAGGA	CAGCATGCAAGAAAGCTGGGAGAAAGAGTTACTAACAACGAGGAAAGAGAAGGAGAAGAAAGGA	-	-	-
TP47264	This study	ALB16	5.78	5/ALB16 (2.2 cM)	TAACATGCAGCACTCACCAAC	TCTGGTTTCTGGGTAATGAGGA			TAACATGCAGCACTCACCAACCTTTGCTTCATACACTATATAGACAGAGCAACCATACACGACAGAGATCATTTGGCAATTAAAGACAAGAAACAAAAGATGGGTTCAGTGAAACTTGTTACACGCGCTTCTCCTTGTTCTGTGTTCAATCCTCATTACCCAGAAACCAGA	TAACATGCAGCACTCACCAACCTTTGCTTCATACACTATATAGACAGAGCAACCATACACGACAGAAATCATTTGGCAATTAAAGACAAGAAACAAAAGATGGGTTCAGTGAAACTTGTTACACGCGCTTCTCCTTGTTCTGTGTTCAATCCTCATTACCCAGAAACCAGA	-	-	-
TP30473	This study	ALB16	6.65	5/ALB16 (2.2 cM)	CAGCACACAACCGCAATAAC	ATAATTACAGGAAAATATGGTCTTG			CAGCACACAACCGCAATAACGGCCTTTTCAAGACCATATTTTCCTGTAATTAT	CAGCACACAACCGCAATAACGGCCTTTGCAAGACCATATTTTCCTGTAATTAT	0.03	1.1	1.41

## Sheet: Table5
Quantitative control of early flowering in white lupin (Lupinus albus L.)
Sandra Rychel-Bielska, Anna Surma, Wojciech Bielski, Bartosz Kozak, Renata Galek, and Michał Książkiewicz
Supplementary Table S5. PCR annealing temperature, polymorphism detection method, expected products and agarose gel concentration for markers used in the study.
Marker name	PCR annealing temperature	Polymorphism detection	Products Kiev Mutant (pb)	Products P27174 (bp)	Agarose gel (%)
MFT-FT3-F1	58	Product length	295	311	2
FTc1-F4	60	Product length	298	291	1.5
PIF4-F6	58.5	CAPS, Hpy188III	138, 52	102, 52, 36	1.5
FY-F6	61.5	CAPS, Tsp45I	233, 202	435	1.5
FTc2-F4	60	dCAPS, NlaIII	147, 22	169	2
PIF4-F1	58.5	CAPS, MnlI	458, 364, 7, 4	392, 364, 66, 7, 4	3
FLD-F1	63	CAPS, AciI	292, 140, 87, 12	292, 94, 87, 46, 12	3
CO-F1	66	CAPS, MnlI	161, 159, 65, 59, 58, 34, 14, 7, 3	161, 159, 123, 59, 34, 14, 7, 3	3
LD-F1	63	CAPS, MnlI	967, 185, 82, 18	1152, 82, 18	2
ESD4-F7	52	dCAPS, EcoRV	232, 22	254	2
ESD4-F8	63	CAPS, MseI	351	178, 173	1.5
ELF3-F1	61.5	CAPS, AciI	239, 131, 120, 12	382, 120	1.5
VIP3-F2	60	CAPS, NlaIV	114, 85, 70	184, 85	2
TFL1-FT4-F2	60	Product length	716	695	2
ELF1-F1	66	CAPS, AciI	1160, 282	1442	1.5
SVP-F5	58.5	CAPS, DdeI	122, 19	93, 29, 19	2
ELF4-F1	66	CAPS, DdeI	205, 83	205, 54, 29	1.5
TFL1-FT6-F1	55	Product length	476	453	2
FPA-F5	58	CAPS, TaaI	363, 110	473	1.5
FCA-F3	60	CAPS, RsaI	822, 503, 148, 106	822, 651, 106	1.5
MFTa1-F1	60	CAPS, MslI	1408, 338, 195, 119, 57	1425, 338, 195, 119, 38, 19	3
SPL6-F3	60	CAPS, TaqI	267, 119	386	1.5
FRI-F1	63	CAPS, SfaNI	347, 242, 227	574, 242	1.5
FKF-F2M	56	CAPS, ClaI	310, 215	525	1.5
GI-F1	56	dCAPS, TaiI	157	127, 30	2
TP23903	56	CAPS, BseGI	64	49,15	3
TP47110	60	CAPS, HpyF3I	42,24	66	3
TP272531	60	CAPS, HpyF3I	112,49	161	2
TP222136	63	CAPS, CviKI-1	168,27,15	183,27	2
FTa1-F2	60	Product length	2218	1535	1.5
TP235608	56	CAPS, AflII	217	179.38	1.5
TP94353	60	CAPS, RsaI	60,51	111	1.5
TP56963	55	CAPS, HinfI	878,384	878,304,80	1.5
TP278885	60	dCAPS, HpaII	112	86,26	1.5
TP114357	60	dCAPS, HpaII	124	105,19	2
TP115697	60	dCAPS, RsaI	111,24	135	2
SKIP1-F2	56	dCAPS, BseDI	79	48, 31	2
TP100150	56	CAPS, HpyCh4V	87,38,30,5	117,38,5	2
TP288840	60	dCAPS, MboI	60	37,23	3
TP360542	60	dCAPS, TaqI	113	82,31	2
TP3177	60	CAPS, SspI	169	114,55	2
SEP3-F1	56	dCAPS, TaqI	122, 23	145	2
TP11750	60	CAPS, AciI	209	135,74	1.5
TP402859	60	CAPS, HpaII	198	112,86	1.5
TP345457	63	CAPS, BseDI	227,39,12	143,84,39,12	1.5
FRI31-F1	62	CAPS, MseI	254	179, 75	1.5
TP2488	56	dCAPS, TspEI	48,25,21	48,46	3
TP30473	56	CAPS, HpyCH4V	28.25	53	3
TP47264	60	CAPS, MboI	171	105,66	2
TP86766	56	CAPS, DdeI	64	48,16	3

## Sheet: TableS6
Quantitative control of early flowering in white lupin (Lupinus albus L.)
Sandra Rychel-Bielska, Anna Surma, Wojciech Bielski, Bartosz Kozak, Renata Galek, and Michał Książkiewicz
Supplementary Table S6. Results of genotyping of white lupin germplasm collection with PCR-based markers.
Accession	TP114357	FKF-F2M	TP3177	SPL6-F3	FCA-F3	TP86766	TP360542	MFTa1-F1	ELF4-F1	FRI31-F1	TP56963	PIF4-F1	TFL1-FT6-F1	SVP-F5	FPA-F5	TP11750	LD-F1	TP288840	TP115697	ELF3-F1	TP47264	TP272531	TP278885	TP47110	TFL1-FT4-F2	TP222136	TP30473	GI-F1	FTa1-F2	TP100150	VIP3-F2	ELF1-F1	ESD4-F7	SEP3-F1	ESD4-F8	FLD-F1	TP2488	PIF4-F6	TP345457	FTc2-F4	TP23903	TP402859	FRI-F1	SKIP1-F2	TP94353	FY-F6	FTc1-F4	CO-F1	MFT-FT3-F1
95015	2	1	1	2	1	2	1	1	2	2	2	1	1	1.5	1	1	1.5	1	2	1	1	1	1	2	1	1	1	1	1	1	2	1	1	1	1	1	2	1	1	2	1	1	1	1	2	2	1	2	1
95038	1	1	1	2	2	1	1	1	2	2	1	1	2	1	1	1	2	1	1	2	2	1	1	1	2	1	1	1	1	1	2	1	1	1	1	1	2	1	1	1.5	2	1	1	1	1	2	2	2	1
95041	2	1	2	1	2	1	1	-	1	1.5	1.5	2	2	1.5	2	1	2	1	2	2	1.5	1	1	1	2	1	1.5	1	1	1	2	1.5	1	1	1	1	2	2	1	1	1	1.5	1	1	2	2	1.5	2	1.5
95047	2	1	1	2	2	1	1	1.5	1	1	1	2	1.5	1.5	1	1	2	1	1	1	2	1	1	1	1	1	1	2	1	2	2	1	1	2	1	1	2	2	1	2	1	2	1	1	1	2	2	2	1
95077	1	1	1	1.5	1.5	2	1	2	1	2	C	1	1	2	1	1.5	2	1	1	1	2	1	1	1	1	1	2	1	1	1	1.5	1	1	1.5	1	1	2	1	1	1	1	1	1	1	2	1.5	1	2	1
95080	2	1	1	2	2	2	1	1	2	2	1	1	2	2	2	1	2	1	1	1	1	1	1	1	2	1	2	1	1	1	2	1	1	2	1	1	2	1	2	1	2	2	1	1	1	2	2	2	1
95101	1	1	1	2	1.5	2	1	-	1	2	1.5	1	1.5	1	2	1	1.5	1	1	2	2	2	1	1	1	1	1	1	1	1	2	1	1	1.5	1	1	2	2	1	1	1	1	1	1	2	1.5	2	2	1
95109	1	1	1	2	2	2	1	2	1	2	1	1	2	2	2	1	2	1	2	1.5	2	1	1	1	2	1	1	1	1	1	2	1	1	1	1	2	2	1	1	1	2	1	1	1	1	1	2	1	1
95113	1	1	1	2	2	2	1	1.5	1	2	1	1	1	1	2	1	2	1	2	1	1	1	1	1	1	1	2	1	1	1	2	1	1	1	1	1	2	1	1	1	2	2	1	1	2	1	2	1	2
95114	1	1	1	1	2	2	1	2	2	2	1	1	1	1	2	1	1	1	2	1	1	1	1	2	1	1	1	1	1	1	2	1	1	1	1	2	2	1	1	1.5	2	2	1	1	1	2	2	2	1
95130	1	1	1	1.5	2	1	1	2	1	2	2	1	2	1.5	2	1	2	1	1	1	2	2	1	1	2	1	1	1	1	1	2	1	2	1	2	1	1	1	1	1.5	2	1	1	1	2	2	2	1	2
95132	1	1	1	1	2	1	2	2	1	2	2	1	2	1.5	2	1	2	2	1	1	2	1	1	1	2	1	2	1	1	2	2	1	1	1	1	1	2	1	1	1	2	2	1	1	1	2	2	2	1
95143	1	1	1	1	2	1	1	2	1	2	1	2	2	1	2	1	1	1	1	1.5	1	2	1	1	2	1	2	1	1	1	2	1	1	1	1	2	2	1	1	1.5	2	1.5	1	1	1	2	2	2	1
95146	1	1	1	1	1	1	1	2	1	1	2	1	1	1	1	1	1	1	2	1	1	1	1	1	1	1	1	1	1	1	1	1	1	1	1	1	1	1	1	1	1	1	1	1	2	1	C	1	1
95149	1	2	1	1.5	1	2	1	2	1	1	2	2	1	1	2	1	2	1	2	1	2	1	1	1	1	1	1	1	1	1	1.5	1	1	1	1	1	1	2	1	1	2	1	1	1	2	2	1	2	1
95151	1	1	1	2	2	2	1	2	1	1.5	1	1	2	1	2	1	1	2	1	1.5	1	1	1	1	2	1	1	1	1	2	2	1	1	1	1	1	1	1	1	1	2	2	1	1	2	2	2	2	2
95152	1	1	2	2	2	2	1	2	2	1	1	1	2	1	2	1	1	1	1	1	2	1	1	1	2	1	2	1	1	1	2	1	1	1	1	1	2	1	1	1	1	2	1	1	2	2	2	1	1
95155	2	1	1	1	2	2	1	2	1	1	1	2	2	1	2	2	2	1	1	1.5	2	2	1	2	2	1	2	1	1	2	2	1	1	1	1	2	1	2	1	1.5	1	1	1	1	2	2	1	1	1
95177	2	1	1	2	2	1	1	1.5	1	2	1	2	2	1	1	1	2	1	1	2	1	1	1	1	2	1	1	1	1	2	2	1	1	1	1	1	1	2	1	1.5	1	1	1	1	1	1	2	1	1
95187	1	1	1	1	1	2	1	2	2	2	1	1	2	1	1.5	1	2	1	1	2	1	1	1	1	2	1	1	1	1	1	1	2	1	1	1	1	2	1	1	1	1	1	1	1	1	2	2	1	1
95211	1	1	1	2	2	2	2	1	1	2	1	1	2	2	2	1	1	2	1	1	1	2	1	1	2	1	1	2	1	2	2	2	1	2	1	2	1	1	1	1	2	2	1	1	2	2	2	1	1
95212	1	1	1	2	2	2	1	1	1	2	1	1	2	2	2	1	1	1	1	1	2	2	1	1	2	1	1	2	1	1	2	1	1	1	1	2	2	1	1	1	2	2	1	1	2	2	2	1	1
95213	1	1	1	1	2	2	1	-	1	2	1	2	2	2	2	1	1	1	1	1	2	2	1	1	2	1	1	1	1	1	2	1	1	2	1	2	2	1	1	1	2	2	1	1	2	2	2	1	1
95216	1	1	1	2	1	1	1	-	1	1	1	2	1	1	1	1	1	1	1	1	1	1	1	1	1	1	1	1	1	1	1	1	1	1	1	1	1	2	1	1	1	1	1	1	1	1	1	1	1
95219	1	1	1	1	1	1	2	1	1	1	1	1	2	2	2	2	1	2	1	1	1	1	1	1	2	2	1	1	1	2	1	1	1	1	1	1	1	1	1	1	1	1	1	1	1	2	2	1	1
95223	2	1	1	2	2	2	1	2	1	2	1	2	2	2	2	1	2	1	2	1	2	1	1	1	2	1	2	2	1	2	2	1	1	2	1	1	1	2	2	1	1	2	1	1	2	2	2	1	1
95234	1	1	1.5	1.5	2	1	1	2	2	1	2	1	2	1	2	1	1.5	1	1	1	2	1	1	2	2	1	1	1	1	1	2	1	1	1	1	1	2	1	1	1	2	1	1	1	1	2	2	1.5	1
95243	1	1	1	2	2	2	1	1.5	2	2	2	1.5	2	1	2	1	1.5	1	1	1	1	1	1	1	2	1	2	1	1	2	2	1	1	1	1	1	1	1	1	1.5	2	1	1	1	1	2	2	2	1
95244	1	1	1	2	2	1	1	1.5	1	2	2	2	1.5	1	1.5	1	2	1	1	1	2	1	1	1	1	1	1	1	1	1	2	1	1	2	1	1	2	1	1	2	1	1.5	1	1	2	1.5	2	2	1
95245	1	1	1	1	2	1	1	1.5	2	2	2	1	2	1.5	1	1	2	1	1	1	1	1	1	1	2	1	1	1	1	1	2	2	1	1	1	1	1	1	2	1	2	2	1	1	2	2	1	1	1.5
95246	1.5	1	1	2	2	1	2	2	2	2	2	1	2	1	1	1	1.5	1	2	1	1	2	2	1	2	1	1	2	2	1	2	1	1	1	1	1	2	1	1	2	2	2	1	1	2	2	2	1	1
95267	1	1	1	1	1	1	1	2	1	2	1	1	2	1	1	1	1	1	2	2	2	1	1	1	2	1	2	2	1	1	2	1	1	1	1	2	1	1	2	1	2	2	1	1	2	2	2	2	1
95276	2	1	2	1	2	2	1	1	1	2	1.5	1	2	1	1	1	1.5	2	1	2	2	1	1	1	2	2	1	1	1	2	2	1	1	1.5	1	2	2	1	1	1	1	2	1	1	2	2	2	1	2
95406	2	1	1	2	2	1	1	-	1	1	1	2	2	1	1	1	1	1	1	2	1	1	1	1	2	1	1	1	1	1	1	1	1	1	1	1.5	1	1	1	1	1	1	1	1	1	1	2	1	1
95407	1	1	1.5	1	2	1	1	1.5	1	1.5	1	2	2	2	2	1	1	1	1	1	1	1	1	1	2	1	1	1.5	1	2	2	1	1	2	1	1	2	2	2	1	1	2	1	1	2	1.5	2	1.5	2
95409	1	1	1	2	2	2	1	2	1	1	1	1	1	1	2	1	1	1	1	2	2	1	1	1	1	1	1	1	1	1	2	1	1	1	1	1	1	1	1	1	1	1	1	1	1	1	2	2	1
95422	2	1	1	2	2	2	1	-	2	2	1	2	2	1	1	1	2	1	1	1	1	1	1	1	2	1	1	1	1	1	1	1	1	1	1	1	1	2	1	2	1	1	1	1	2	1	2	1	1
95424	1	1	1	2	2	2	1	1	1	1	1	1	2	1	1	1	2	1	1	2	2	1	1	1	2	1	1	1	1	1	1	1	1	1	1	1	2	1	1	1	1	1	1	1	1	1	1	1	1
95427	1	1	2	2	2	2	1	1	1	2	1	1	1	1	2	2	2	1	1	1.5	2	1	1	1	2	1	1	1	1	1	1.5	1	1	1	1	1	2	1	2	1	1	1	1	1	2	2	2	2	1
95428	1	1	2	2	1	1	1	-	1	2	1	2	2	1	1.5	1	1	1	1	1	1.5	2	1	1	1	1	2	1	1	1	2	1	1	1	1	1	2	2	1	2	2	1	1	1	1	2	1.5	1.5	1.5
95440	1	1	2	1	1	2	1	-	2	2	2	1	2	1	1	2	1	1	2	1	2	1	2	1	2	1	1	1	1	1	1	1	1	1	1	1	2	2	2	1	1	1	1	1	2	1	2	1	1
95468	1	1	1	1	1	2	1	1	2	2	2	1	2	1	2	1	2	1	2	1	2	2	2	1	2	1	1	2	1	1	1	1	1	1	1	1	1	1	1	1	1	1	1	1	2	2	2	1	1
95479	1.5	1	1	1	1	1	1	-	1	1	1	1	1	1	1	1	1	1	1	1	1	1	1	1	1	1	1	1	1	1	1	1	1	1	1	1	1	1	1	1	1	1	1	1	1	1	1	1	1
95480	1	1	1	1	2	2	1	1	2	2	1	1	1	1	2	1	1	1	1	1	1	1	1	1	1	1	1	1	1	1	1.5	1	1	1	1	1	2	1	1	1	1	1	1	1	1	2	1	1	1
95513	1	1	1	2	2	1	1	-	1	2	1.5	2	1	1	1	1	2	1	2	1	2	1	2	1	1	1	1	1	1	1	2	1	1	1	1	1	1	2	1	1	1	1	1	1	2	1	1	2	1
95523	1	1	1	1	2	1	2	2	1	2	2	2	2	1	2	2	2	1	1	1	1	1	1	1	2	1	1	1	1	1	2	1	1	2	1	1	2	2	1	1	2	2	1	1	2	2	C	1	1
95524	1	1	1	2	2	2	1	-	2	2	1	2	2	2	1.5	1	2	2	1	1	2	1	1	1	2	1	2	2	1	2	2	1	1	2	1	1	2	2	1	1	2	1	1	1	2	2	1	2	1
95525	2	1	1	1	2	1	1	2	1	2	2	2	2	2	2	1	2	1	1	1	2	1	1	1	2	1	1	1	1	1	2	1	1	2	1	1	2	2	2	2	1	2	1	1	1	2	C	1	1
95526	2	1	1	1	2	2	2	1	1	2	2	1	2	2	2	2	1	2	2	1	2	2	1	1	1	1	1	1	1	2	1	2	1	2	1	1	2	1	1	1	1	1	1	1	1	1	2	2	1
95527	1	1	1	1	1	2	1	1	2	2	2	1	2	1	2	1	1	1	2	2	2	1	1	1	2	1	1	1	1	1	2	1	1	1	1	2	1	1	1	1	2	2	1	1	1	1	2	2	1
95528	1	2	1	2	2	2	1	2	1	2	1	1	2	1	1	1	2	1	2	2	1	1	1	1	2	1	1	1	1	1	2	1	1	1	1	1	1	1	1	1	1	1	1	1	1	2	2	2	1
95602	2	1	1	1	2	2	1	1	2	2	1	1	2	1	2	1	1	1	1	1	2	2	1	1	2	1	1	2	1	1	1	1	1	1	1	2	2	1	1	1	2	2	1	1	1	1	1	2	2
95605	1	1	1	1	2	1	1	1.5	1	1	1	1	2	1	1.5	1	2	1	1	1	2	1	1	1	2	1	1	1	1	1	1	1	1	1	1	1	1	1	2	1	1	2	1	1	2	2	2	3	2
95482	1	1	1	1.5	1	1	1	1	2	2	2	1	1.5	1	1	1	2	1	2	1	1.5	1	2	1	1	1	1	1	1	1	1	1	1	1	1	1	2	1	1	1	1	1	1	1	2	1	1	2	1
95515	1	1	1	2	2	1	1	-	1	2	1.5	2	2	2	1	1	1	2	1	1	1	1	1	1	2	2	2	1	1	2	1	1	1	2	1	1	2	2	2	1	1	2	1	1	2	2	2	1.5	1
95516	1	1	1	1	2	2	1	2	2	2	1	1	2	1	2	2	2	2	2	1	2	2	1	1	2	1	2	1	1	2	1	1	1	2	1	1	2	2	1	1	2	2	1	1	1	2	2	2	1
95517	1	2	1	1	2	2	1	-	1	2	2	1	2	2	1	1	2	2	1	1	1	1	1	1	2	1	1	2	1	2	2	1	1	1	1	2	2	2	1	1	2	2	1	1	2	2	1	1	1
95522	1	1	1	1.5	2	1	2	2	1	2	2	1	2	2	2	1	1	2	1	1	2	1	1	1	2	1	2	1	1	2	2	1.5	1	2	1	1	2	1	1	1	2	2	1	1	2	2	2	1	2
95529	2	1	1	1	2	2	1	2	2	2	2	2	2	1	1	1	1	1	1	1	2	1	1	1	2	1	2	1	1	1	2	2	1	2	1	1	2	2	1	1	2	1	1	1	1	2	2	2	1
95530	1	1	1	2	2	1	1	-	1	1	1	2	1	1	1	1	2	1	1	2	2	1	1	1	1	1	1	1	1	1	2	1	1	1	1	1	1	2	1	2	1	1	1	1	1	1	1	2	1
95419	2	1	2	1	2	2	2	2	1	2	2	1	1.5	1	1	1	1	2	1	1	2	1	1	1	1	1	1	1	1	2	2	1	1	2	1	1	2	1	1	1	2	1	1	1	2	1	1	2	1
95403	2	1	1	1	2	2	1	-	1	1	1	1	2	1	2	1	2	1	1	2	2	1	1	1	2	1	1	1	1	1	1	1	1	1	1	1	2	2	1	2	1	1	1	1	1	1	1	1	1
95481	C	1	1	2	2	2	1	1	1	2	1	1	2	1	2	1	2	1	1	2	2	1	1	1	2	1	1	1	1	1	2	2	1	1	1	1	2	1	1	1	1	1	1	1	1	1	1	1	1
95036	1	1	1.5	1.5	2	1	1	1.5	1	2	2	1.5	2	2	1.5	1	1.5	1	1	1.5	2	1.5	1	1	2	1	2	1	1	1	2	1.5	1	2	1	1	1	1	2	1.5	1	1	1	1	2	2	C	2	1
95072	1	1	1	1	2	2	1	2	1	1	1	1	1	1	2	1	1	1	1	1	2	1	1	1	1	1	1	2	1	1	2	1	1	2	1	1	1	1	1	1.5	2	2	1	1	2	2	2	1	1
95075	2	1	1	2	2	2	2	1	1	2	1	1	2	1	2	1	1	1	1	1	2	1	1	1	2	1	1	1.5	1	1	2	1	1	1	1	1	2	1	1	1	1	1	1	1	2	2	2	1.5	1
95163	1	1	1	2	1	1	1	2	1	1	1	1	1	1	1.5	1	2	1	1	1	2	1	1	1	1	1	1	1	1	2	2	1	1	1	1	2	1	1	1	1	1	2	1	1	2	2	2	2	1
95442	1.5	1	1	2	2	1	1	1	1	1	1	1.5	1	1	1	1	1	1	1.5	2	2	1	1	1	1	1	1	1	1	1	1.5	1	1	1	1	1	1	2	1	1	1	1	1	1	2	1	2	1	1
95048	1	1	1	2	2	2	1	2	1	2	2	2	2	1.5	2	1	2	1	1	1	1.5	1	1	1	2	1	1	1	1	1	2	1.5	1	2	1	1	2	2	1.5	1	1	1	1	1	1	1.5	C	1.5	2
95064	1	1	1	2	2	2	1	1	1	2	1	1	1.5	2	2	1	1.5	1	1	1.5	2	1	1	2	1	1	1	1	1	1	2	1	1	2	1	2	2	1	1	1	1	2	1	1	2	2	1	2	1
95076	1	2	1	1.5	2	2	1	1	1	2	1	1	2	1	2	1	1	1	1.5	1	2	1	1	1	2	1	1	1	1	1	2	1	1	1	1	1	2	1	1	1	1	1	1	1	2	2	1	2	1
95084	2	1	1	2	1	2	1	1	2	2	1	1	2	2	1	1	1	1	1	1	2	1	2	1	2	1	1	1	1	1	1	1	1	1	1	1	2	1	1	1	1	1	1	1	2	1	2	1	1
95102	1	1	1.5	2	2	2	1	1.5	2	2	1	1	1	1.5	1	1	1	1	1	1	1.5	1	2	2	1	1	1.5	1	1	1	2	1	1	1	1	1	2	1	1.5	1	1	1	1	1	1	1	2	2.5	1
95145	2	1	1	2	1	1	1	1	2	2	1	1	1	1	2	1	1	1	1	1	1	1	1	1	1	1	1	1	1	1	2	1	1	2	1	1	1	1	2	1	2	2	1	1	2	2	1	1	1
95470	1	1	1	1	1	1	1	1.5	1	2	1	1	2	1	1	1	1.5	1	1	2	2	1	1	1	2	1	2	1	1	1	1	1	1	1	1	1	1	1	1	1	1	1	1	1	1	1	C	1	1
95054	1	1	1	2	2	1	1	1	1	2	2	1	2	1	2	1	1	1	1	1	2	1	1	1	2	1	1	1	1	1	2	1	1	1	1	1	1	1	1	1	2	1	1	1	1	2	2	2	1
95059	2	1	1	2	2	1	1	1	2	2	2	1	2	1	2	1	1	1	2	1	2	1	1	1	2	1	1	2	1	1	2	1	1	1	1	1	2	1	1	1	2	1	1	1	2	1	2	1	2
95237	2	1	1	2	2	1	1.5	1	1	2	1	1.5	2	1	2	1	2	2	1	2	2	1	1	1	2	1	1	1	1	2	1	1	1	1	1	2	2	2	1	1.5	1	1	1	1	1	2	2	2	1
95125	2	1	1	1	1	1	1	1	2	1.5	1	1	1	1.5	1	1	1.5	1	2	1	1	2	1	1	1	1	2	2	1	1	1	1	1	2	1	1	2	1	1	1	2	2	1	1	1	2	1	2	1
95147	1	1	1	2	2	1	1	2	1	2	1	1	2	1	1.5	1	2	2	1	1	2	1	1	2	2	1	2	1	1	1	2	1	1	1	1	1	1	1	1	1	2	1	1	1	1	1	2	1	1
95033	1	1	1	1	1.5	1	1	1	1	1.5	1.5	2	2	2	1	1	1	1	2	1	2	1	1	1	2	1	2	1	1	1	1	1	1	2	1	1	1	2	1	1	1	1	1	2	2	2	2	2	1
95035	1	1	1	2	1	1	1	1	1	1	2	2	2	1	1	1	2	1	2	1	2	1	1	1	2	1	2	1	1	2	2	1	1	2	1	2	1	2	1	1	1	1	1	1	1	2	2	2	1
95042	1	1	1	2	2	2	1	2	1	2	1	2	2	1	1	1	1	1	2	1	2	1	1	1	2	1	1	1	1	1	2	1	1	2	1	1	2	2	1	1	2	2	1	1	2	2	2	2	1
95078	2	1	1	2	2	1	1	1.5	1	2	1	1	2	1	1.5	1	1	2	2	2	2	1	1	1	1	1	1	1	1	2	2	1	1	1	1	1	2	1	1	1.5	1	1	1	1	2	1	C	2	1
95097	1	1	1	2	1	1	1	1	1	2	1	1	2	1	2	1	1	1	2	1	2	1	2	1	1	1	2	1	1	1	2	1	1	1	1	2	2	1	1	2	1	1	1	1	2	2	2	1	1
95124	1	1	1	1	1.5	2	1	1	2	1	2	1	1.5	1.5	1.5	1	1.5	2	1	1	1.5	2	2	1	1	1	1	1	1	2	1	1	1	2	1	1	2	1	1	2	1	1	1	1	1	2	2	2	1
95144	1	1	1	1	1.5	1	1	2	1	2	1	1	2	1	1.5	1	1	1	1	2	2	1	1	2	2	1	2	1	1	1	1	1	1	1	1	1	1	1	1	1	1	1	1	1	1	1	C	1.5	1
95153	1	1	1	1	1	1	1	2	1	2	2	1	1	1.5	2	1	2	1	1	1	2	1	1	1	1	1	1	1	1	1	1	1	1	2	1	2	2	1	2	1	2	2	1	1	2	2	2	1	2
95175	1	1	1	2	2	1	1	1	1	2	1	1	2	1	1	1	2	1	2	1	1	1	1	1	2	1	1.5	1	1	1	2	1	1	1	1	1	1	1	1	1	1	1	1	1	2	1	1	2	1
95148	1	1	1	2	1	2	1	2	1	2	2	1	2	1	2	1	1	1	1	1	2	2	1	1	2	1	1	2	1	1	2	1	1	2	1	1	1	1	1	1.5	2	2	1	2	2	2	2	2	1
95476	2	1	1	2	1	2	2	1	1	2	2	1	2	1	1.5	1	2	1	2	1	1	1	2	1	2	1	1	1	1	1	1	2	1	1	1	1	1	1	1	1.5	1	1	1	1	2	1	C	3	1
95049	2	1	1	2	2	2	1	1	1	2	1	1	2	1.5	1	1	1	2	1	2	2	2	1	2	2	1	1	2	1	2	2	1	1	2	1	2	2	1	2	1.5	2	1	1	1	2	2	2	2	1
95116	1	1	1	1.5	2	2	1	1	1	2	1	1	2	1	2	1	1	2	1	1	2	1	1	1	2	1	1	1	1	2	2	1.5	1	1	1	1	1	1	1.5	2	2	1	1	1	2	2	2	2	2
95071	1	1	1	1	2	2	1	1	2	2	1	1	1.5	2	1	1	2	2	1	1	2	1	1	1	1	1	1	1	1	2	2	1	1	2	1	1	2	1	2	2	1	2	1	1	2	2	2	1	1
95157	2	1	1	2	1	1	1	2	2	2	1	1	2	1	2	1	1	2	1	1	1	1	1	1	2	1	1	1	1	2	2	1	1	1	1	2	1	1	2	2	2	1	1	1	2	2	2	1	2
95103	1	1	1	2	2	1	1	1	2	2	2	2	2	2	2	1	2	1	1	2	2	2	1	1	2	2	2	1	1	1	2	1	1	1	1	1	1	2	1	2	1	1	1	1	2	1	2	2	1
95609	1	1	1	1	2	2	1	2	1	1.5	1	1	2	1	1	1	1	1	1	1	2	1	1	1	2	1	1	1	1	1	1	1	1	2	1	1	2	1	1	2	2	2	1	1	2	2	2	2	1.5
95108	1	1	1	1	1.5	1	1	2	1	1.5	1	1	2	1	2	1	1.5	1	1	1	1	2	1	1	2	2	2	1	1	1	2	1	1	1	1	1	2	1	1	1	2	1	1	1	2	1.5	2	2	1
95040	2	1	2	2	2	2	2	1	1	1	1	1	1	1	1	1	1	2	2	1	1	2	1	2	1	1	1	1	1	2	2	1.5	1	1.5	1	1	2	1	2	1	1	2	1	1	2	1	2	2	1
95434	1	1	2	1.5	2	2	1	-	1	1	1	1	2	1	2	1.5	1	1	1	1	2	1	1	1	2	1	1	1	1	1	1	1	1	1	1	1	2	1	2	1	1	1	1	1	1	1	1	1	1
95510	1	1	1	2	1	1	1	-	1	1	2	1	1	1	2	1	1	1	1	2	1	1	1	1	1	2	1	1	1	1	1	1	1	1	1	1.5	1	1	1	1	2	1	1	1	1	2	1	1	1
95023	1	1	1	1	1	2	1	-	2	2	2	1	1	1	2	1	1	1	1	1	2	1	1	1	1	1	2	1	1	1	2	1	1	1	1	1	2	1	1	1	1	1	1	1	2	1.5	2	2	1
95034	2	1	1	1.5	1.5	2	1	-	2	2	1	1	2	2	2	1	1	2	1	1	2	1	1	1	2	2	1	1	1	2	1.5	1	1	1.5	1	1	2	1	1	1	2	1.5	1	1	1	2	2	2	1
95085	2	1	1	1	2	2	1	-	1	2	1	1	2	1	2	1	2	1	1	1	2	1	1	1	2	1	1	1	1	1	2	1	1	1	1	1	2	1	1	1	1	2	1	1	2	1	2	2	1
95086	1	1	2	1	2	1	1	-	2	2	2	1	2	1	2	1	1	1	1	1	1	1	1	1	2	2	1	2	1	1	2	1	1	1	1	1	1	1	1	1	2	1	1	1	1	2	2	2	1
95087	1	1	1	1	2	1	1	-	1	2	1	2	2	1	2	1	2	1	1	1	1	1	1	1	2	1	2	1	1	1	1	1	1	1	1	2	2	1	1	1	1	2	1	1	1	2	2	1	1
95133	1	1	1.5	1.5	2	2	1	-	2	2	1.5	1	2	1	2	1	1.5	1	1	1	2	1	1	1	2	2	1	1.5	1	1	2	1	1	1	1	2	2	1	1	1	1	1	1	1	2	2	2	2	1
95185	1	1	1	1	1	2	1	-	2	2	1	1	2	2	2	1	2	1	1	1	2	1	1	1	2	1	1	1	1	1	1	2	1	1	1	1	2	1	1	1	1	1	1	1	2	2	2	2	1
95197	1	1	1	2	1	2	1	-	2	2	1	1	2	2	2	1	2	1	2	1	1	1	2	1	2	2	2	1	1	1	2	1	1	1	1	2	1	1	1	1	2	1	1	1	2	1	2	2	2
95203	1	1	1	1	1	2	1	-	2	2	C	1	1	1	1	1	1	1	2	1	1	1	2	1	1	2	1	1	1	1	1	1	1	1	1	1	2	1	1	1	1	1	1	1	2	1.5	C	2	1
95214	1	1	1	1	1	1	1	-	1	2	1	1	2	1	1	1	1	2	1	2	2	1	1	1	2	1	2	1	1	2	1	1	1	1	1	1	2	1	1	1	1	1	1	1	1	2	1	2	1
95215	1	1	1	1	1	1	1	-	1	2	2	1	2	1	1	1	1	1	1	2	2	2	1	1	2	2	1	2	1	1	1	1	1	1	1	1	2	1	1	1	2	1	1	1	1	1	1	2	1
95220	1	1	1	1	1	1	2	-	1	1	1	1	2	1.5	1.5	2	2	2	1	1	1	1	1	1	2	1	1	1	1	2	1	1	1	1	1	1	1	1	1	1	1	1	1	1	1	2	C	2	1
95231	1	1	1	2	2	2	1	-	2	2	2	2	2	1	1	1	1	1	2	1	1.5	2	1	1	2	1	2	2	1	1	2	1	1	1	1	1	2	2	1	1	1	1	1	1	2	2	2	2	1
95251	1	1	1	2	2	2	1	-	1	2	1	1	2	2	2	1	1	2	1	1	2	2	1	1	2	2	1	2	1	2	2	1	1	1	1	2	1	1	1	1	2	2	1	1	2	2	2	2	1
95252	1	1	1	1	1	1	1	-	1	2	1	1	2	1	1	1	2	1	1	2	1	1	1	1	2	2	1	1	1	1	1	1	1	1	1	1	1	1	1	1	1	1	1	1	1	1	2	1	1
95253	1	1	1	2	2	2	2	-	1	1	1	1	2	2	2	1	2	2	1	2	2	1	1	1	2	2	1	2	1	2	2	1	1	1	1	2	2	2	2	1	2	2	1	1	1	2	2	2	1
95254	1	1	2	2	1	2	1	-	1	2	1	2	2	2	2	2	1	2	1	1	2	2	1	1	2	2	1	2	1	2	2	1	1	1	1	2	1	2	1	1	2	2	1	1	2	2	2	2	1
95255	2	1	1	1.5	1.5	1	1	-	1	1	1.5	1	2	2	2	1	1	1	1	1	1	1	1	1	2	2	1	1	1	1	1.5	1	1	1	1	1	2	1	1	1	2	1	1	1	1	2	1	2	C
95257	1	1	1	1	2	1	1	-	1	2	1.5	1	2	1	2	2	2	2	2	2	1	1	1	1	2	2	2	2	1	2	1	2	1	1	1	1	2	1	1	1	1	2	1	1	2	2	2	2	2
95264	1	1	2	2	2	2	2	-	1	1	1	1	1.5	2	1	1	2	2	1	1	1.5	1	1	1	1	2	1	2	1	2	2	1	1	2	1	2	2	2	1	1	2	1	1	1	1	2	2	2	1
95266	1	1	1	1.5	1.5	2	1	-	1	2	2	1	2	1	1.5	1	1	1	2	2	2	1	2	1	2	2	2	1	1	1	1.5	1	1	1	1	1	2	1	1	1	2	1.5	1	1	2	2	2	2	1
95269	1	1	1	1.5	1.5	2	1	-	1	2	1	1	2	1	1	1	1	1	1	1.5	1	1	1	1	2	1	2	1	1	1	2	1	1	1	1	1	2	1	1	1	2	2	1	1	2	1.5	2	2	1
95275	1	1	1	2	2	2	1.5	-	1	1.5	1.5	1	2	1	1.5	1	1.5	2	1	1	2	1	1	1	2	2	1	1.5	1	2	1.5	1	1	1	1	1	2	1	1	2	1	1	1	1	2	1.5	2	2	1
95414	1	1	1	1	1	1	1	-	1	1	1	1	1	1	1	1	1	1	1	1	1	1	1	1	1	1	1	1	1	1	1	1	1	1	1	1	1	1	1	1	1	1	1	1	1	1	1	1	1
95415	1	1	1	1	1	1	1	-	1	1	1	1	1	1	1	1	1	1	1	1	1	1	1	1	1	1	1	1	1	1	1	1	1	1	1	1	1	1	1	1	1	1	1	1	1	1	1	1	1
95416	1	1	1.5	2	1	1	1	-	1	1	1	2	1	1	2	1	1.5	2	1	2	1	1	1	1	1	1	1	1	1	2	2	1	1	1	1	1	2	2	1	1	1	1	1	1	1	1	1	1	1
95431	1	1	1	1	1	1	1	-	1	1	1	1	1	1	1	1	1	1	1	1	1	1	1	1	1	1	1	1	1	1	1	1	1	1	1	1	1	1	1	1	1	1	1	1	1	1	1	1	1
95432	1	1	2	2	1	1	1	-	1	2	1	1	1	2	2	1	1	2	2	2	1	1	1	1	1	1	1	1	1	2	2	1	1	1	1	1	1	1	1	1	1	1	1	1	2	1	1	-	1
95433	2	1	2	2	2	2	1	-	1	2	1	2	1	1	2	1	2	1	1	2	2	1	1	1	1	1	1	1	1	1	2	1	1	1	1	1	2	2	1	1	1	1	1	1	1	1	1	1	1
95439	1	1	1	1	2	2	1	-	1	1.5	2	1	2	1	2	1	1.5	1	2	2	2	1	2	1	2	1	1	1	1	1	1	1	1	1	1	1	2	1	-	1	1	1	1	1	2	1	C	1	1
95443	1	1	1	2	2	1	1	-	1	2	1	1	2	1	1	1	2	1	2	2	1	1	1	1	2	2	1	1	1	1	2	1	1	1	1	1	1	1	1	1	1	1	1	1	2	2	2	2	1
95456	1	1	1	2	2	2	1	-	2	2	1	1	1	1	1	1	1	1	1	2	1	2	1	1	1	2	1	2	1	1	1	2	1	1	1	1	2	1	1	1	2	1	1	1	1	2	1	2	1
95518	1	1	1	2	2	2	2	-	2	2	1	1	2	1	1	2	1	2	1	2	1	1	1	1	2	1	1	1	1	2	1	1	1	1	1	2	2	1	1	2	1	2	1	1	1	2	1	2	1
95520	-	-	-	-	-	-	-	-	-	-	-	-	-	-	-	-	-	-	-	-	-	-	-	-	-	-	-	-	-	-	-	-	-	-	-	-	-	-	-	-	-	-	-	-	-	-	-	-	-
95521	1	1	1.5	1	1	1	1.5	-	2	2	1	1	2	1	2	1.5	1.5	2	1	2	1	1	1	1	2	1	1.5	1	1	2	2	2	2	1.5	1.5	2	2	1	2	1	1	2	1	1	2	2	C	2	2
95606	1	1	1	1	2	1	1	-	1	2	2	1	1	1	2	1	1	1	1	1	2	1	1	1	1	2	1	2	1	1	2	1	1	1	1	1	2	1	1	1	2	1	1	1	2	2	2	2	1
95007	1	-	1	2	2	1	1	-	1	2	1	1	2	2	2	1	2	2	1	1	2	2	1	1	2	2	2	2	1	1	1	1	1	2	1	1	2	1	1	1	2	2	1	1	1	2	2	1	1
95012	2	1	1	2	2	2	1	-	2	1	1	1	2	1	2	2	2	1	1	1	2	1	1	1	2	2	1	1	1	1	2	1	1	2	1	2	1	1	1	1	2	2	1	1	2	2	C	2	1
95062	2	1	1	2	2	1	1	-	2	2	1	1	2	1	1	1	1	1	1	2	1	1	1	1	2	2	1	1	1	1	2	1	1	2	1	1	1	1	1	1	2	1	1	1	1	2	2	2	1
95095	1	1	1	2	2	2	2	-	2	2	1	1	2	1	2	1	1	2	2	2	2	1	1	1	2	2	1	1	1	2	1	1	1	2	1	1	2	1	1	1	1	2	1	1	2	2	2	1	1
95128	1	1	1	1.5	1.5	1	1.5	-	1	2	1	1	2	1.5	1.5	1	1.5	1.5	1	1.5	1.5	1	1	1	2	2	1.5	1.5	1	2	1.5	1	1	1	1	1	2	1	1	1	2	1	1	1	2	1.5	2	1	1
95138	2	1	1	2	2	2	1	-	2	2	1	2	2	2	1	1	1	1	2	2	2	1	1	1	2	1	1	1	1	1	1	1	1	1	1	1	2	2	1	1	1	1	1	1	2	1	2	2	1
95160	1	1	1	1	1	2	1	-	1	2	2	1	2	1	1	1	2	1	2	1	2	1	2	1	2	1	1	1	1	1	1	1	1	1	1	1	2	1	1	1	1	1	1	1	2	1	1	2	1
95166	1	1	1	2	2	1	1	-	2	1	2	1	1	1	2	1	1	1	2	1	1	1	2	1	1	1	1	1	1	1	2	1	1	1	1	1	1	1	1	1	1	1	1	1	2	1	2	1.5	1
95176	1	1	1	2	2	2	1	-	1	2	1.5	1	2	1	2	1	2	1	2	1	2	1	2	1	2	1	1	1	1	1	1	1	1	1	1	1	2	1	1	1	1	2	1	1	2	1	1	2	1
95230	1	1	1	1	1	1	1	-	1	1	1	1	2	1	1	1	1	1	1	1	1	1	1	1	2	1	1	1	1	1	1	1	1	1	1	2	1	1	1	1	1	1	1	1	1	1	2	1	1
95239	1	1	1	2	1.5	1	1	-	1	1.5	1	1	2	1	2	1	1.5	2	1	1	1.5	2	1	1	2	2	1	1.5	1	2	2	1	1	1	1	2	2	1	1	1	1	2	1	1	2	2	2	2	1
95404	1	1	2	1.5	1.5	1	1	-	1	1.5	1.5	1	2	1	2	1	2	1	1	2	1	1	1	1	2	1	2	1.5	1	1	1	1.5	1	1	1	1	2	1	2	1	1	1	1	1	1	1.5	C	2	1
95405	2	1	1	1	2	2	1	-	1	2	1	1	2	1	1	1	1	1	1	2	2	1	1	1	2	1	1	1	1	1	2	1	1	1	1	1	2	1	1	1	1	1	1	1	2	1	2	2	1
95418	2	1	1	1	2	2	1	-	1	2	1	1	2	1	1	1	1	1	1	2	2	1	1	1	2	1	1	1	1	1	2	1	1	1	1	1	2	1	1	1	1	1	1	1	2	1	2	2	1
95423	1	1	1	1	1	2	1	-	1	1	1	1	2	1	1	1	1	1	1	2	2	1	1	1	2	1	1	1	1	1	2	1	1	1	1	2	2	1	1	1	1	1	1	1	1	1	2	1	1
95430	1	1	1.5	1	2	1	1	-	2	2	1	1	2	1	2	2	2	1	1	2	1	1	1	1	1	1	1	1	1	1	1	1	1	1	1	1	2	1	2	1	1	1	1	1	1	2	2	1.5	1
95445	1	1	2	1	2	1	1	-	1	1	1	1	1.5	1	1.5	2	1	1	1	2	2	1	1	1	1	1	1	1	1	1	1	1	1	1	1	1	1	2	2	1	1	1	1	1	2	1	2	1	1
95449	1	1	2	1.5	2	1	1	-	1	1	1	1	1.5	1	1.5	2	1	1	1	2	2	1	1	1	1	1	1	1	1	1	1.5	1	1	1	1	1	1	2	2	1	1	1	1	1	2	1	2	1	1
95452	1	1	1.5	1.5	1.5	1	1	-	1	1.5	1.5	1	2	1	2	1	2	1	2	2	1	2	1	1	2	1	1	1.5	2	1	1	1	1	1	1	1	2	1	1	1	1	1.5	1	1	2	1.5	C	2	1.5
95454	1	1	1	1	1	1	1	-	2	2	2	1	1	1	2	1	2	1	2	1	1	1	2	1	1	1	1	1	1	1	1	1	1	1	1	1	1	1	1	1	1	1	1	1	2	1	2	1	1
95509	1	1	1	2	2	2	1	-	1	2	1	1	2	1	2	1	1	1	1	2	2	1	1	1	2	1	1	1	1	1	2	1	1	1	1	1	2	1	1	1	1	1	1	1	1	1	2	2	1
95519	2	2	2	2	2	2	2	2	2	2	2	2	2	2	2	2	2	2	2	2	2	2	2	2	2	2	2	2	2	2	2	2	2	2	2	2	2	2	2	2	2	2	2	2	2	2	2	2	2
95413	1	1	1	1	1	1	1	1	1	1	1	1	1	1	1	1	1	1	1	1	1	1	1	1	1	1	1	1	1	1	1	1	1	1	1	1	1	1	1	1	1	1	1	1	1	1	1	1	1
[truncated: 1 more columns]

## Sheet: TableS7
Quantitative control of early flowering in white lupin (Lupinus albus L.)
Sandra Rychel-Bielska, Anna Surma, Wojciech Bielski, Bartosz Kozak, Renata Galek, and Michał Książkiewicz
Supplementary Table S7. P-values of Spearman's rank correlation coefficient calculated for flowering time and marker distribution in white lupin germplasm collection.
Year	2015	2015	2015	2015	2015	2015	2015	2018	2018	2018	2018	2018	2018	2018	2020	2020	2020	2020	2020	2020	2020
Group	All	V1	V2	V3	V4	V5	V6	All	V1	V2	V3	V4	V5	V6	All	V1	V2	V3	V4	V5	V6
ELF4-F1	0.399838	0.333333	0.424655	0.552786	0.12978	0.247032	0.328929	0.854199	0.308068	0.149665	0.861927	0.709392	0.238839	0.646785	0.947897	0.0576689	0.123335	0.833979	0.738115	0.244592	0.540345
PIF4-F1	0.0563733	0.333333	0.0454267	0.741801	0.355853	0.137569	0.37497	0.314995	1	0.709366	0.507475	0.225608	0.405131	0.30276	0.670384	1	0.780874	0.933658	0.611692	0.39501	0.303019
FY-F6	0.00974817	1	0.139633	0.225403	0.236126	0.378061	0.800712	0.000605251	0.559404	0.105207	0.812702	0.0695609	0.125886	0.411308	3.5406e-05	1	0.51324	0.481199	0.0241274	0.0704121	0.937483
TP23903	0.12542	1	0.490144	NA	0.520729	0.872301	0.0542171	0.0235998	0.637618	0.866305	0.262635	0.697915	0.971193	0.20912	0.005494	0.637618	0.974019	0.63366	0.523511	0.728379	0.228346
GI-F1	0.140397	1	0.502074	NA	0.923601	0.792818	0.800712	0.486308	0.637618	0.797006	0.920115	0.669283	0.763267	0.108931	0.101553	0.637618	0.0954866	0.828233	0.580626	0.633765	0.285962
TP222136	0.880836	0.333333	0.586554	0.105573	NA	0.242257	0.473663	0.38066	1	0.710826	0.582613	0.134773	0.490624	0.788071	0.0574797	1	0.369888	0.0887139	0.305373	0.264615	1
TP272531	0.371864	NA	0.660077	0.552786	0.249106	0.480623	0.974755	0.128179	1	0.491422	0.345649	0.21505	0.217769	0.844384	0.0985434	0.559404	0.566117	0.909142	0.833686	0.190155	0.681769
TP47110	0.0334199	NA	0.862091	0.225403	0.0676192	0.11272	NA	0.190937	0.308068	0.327012	0.172779	0.257294	0.170916	NA	0.0531887	0.637618	0.430609	0.144737	0.0463479	0.102835	NA
TP56963	0.625314	0.333333	0.0482029	0.225403	0.397491	0.432682	0.943427	0.99325	0.18169	0.0213905	0.442976	0.214671	0.192247	0.784206	0.440303	0.18169	0.016871	0.101408	0.377351	0.702554	0.968088
TP235608	0.00113859	0.333333	0.11085	NA	0.0700104	0.148746	0.297332	4.89522e-06	1	0.0483702	NA	0.0322424	0.1236	0.279463	0.000189102	1	0.0179762	NA	0.438171	0.365757	0.30014
TP94353	0.0045024	NA	0.181256	0.225403	0.289085	0.141258	0.530852	0.000290727	NA	0.10142	0.955537	0.0906858	0.0904166	0.822809	0.00354128	NA	0.0389568	0.48539	0.550336	0.482072	0.857936
FTa1-F2	0.40787	0.333333	0.395599	NA	NA	NA	NA	0.345847	0.18169	0.280011	NA	NA	NA	NA	0.994974	0.18169	0.149043	0.270931	NA	NA	NA
TP115697	0.888731	0.333333	0.111364	NA	0.840386	0.542402	0.0542171	0.841795	0.0576689	0.012047	0.325631	0.897821	0.789945	0.13798	0.952365	0.308068	0.0995511	0.799299	0.656503	0.578054	0.0453159
TP278885	0.900785	0.333333	0.395599	NA	0.92428	0.700914	NA	0.31842	0.18169	0.280011	0.66017	0.846229	0.726061	NA	0.314538	0.18169	0.149043	0.802643	0.535336	0.772357	NA
TP114357	0.938512	NA	0.528055	0.741801	1	0.835272	1	0.969494	0.308068	0.478631	0.74741	0.414756	0.53636	1	0.867658	0.637618	0.446603	0.80872	0.827434	0.282466	0.670905
FLD-F1	0.169939	1	0.907105	0.741801	0.748544	0.978657	0.158972	0.209218	0.559404	0.387002	0.379877	0.888574	0.788653	0.516291	0.0137951	1	0.403523	0.373582	0.556673	0.619017	0.153729
PIF4-F6	0.0175988	0.333333	0.0731786	NA	0.0804407	0.14269	0.831148	0.0144346	1	0.0438362	0.628134	0.0124151	0.443344	0.498891	0.0798284	1	0.0169346	0.32665	0.419039	0.314214	1
MFTa1-F1	0.443969	0.333333	0.545806	NA	0.292199	0.0044268	0.0390994	0.75499	0.333333	0.457593	NA	0.46966	0.171586	0.0324555	0.650839	0.333333	0.24752	NA	0.562621	0.759409	0.0228948
MFT-FT3-F1	0.00918151	0.333333	0.523331	NA	0.566171	NA	0.571357	0.00226964	0.308068	0.477535	0.40639	0.452127	NA	0.637232	0.00270106	0.0576689	0.96631	0.830487	0.321631	NA	0.686501
SPL6-F3	0.742783	NA	0.286482	0.552786	0.505102	0.76449	0.9807	0.755516	1	0.352231	0.0428355	0.818857	0.467679	0.72006	0.852553	0.559404	0.451172	0.403497	0.879677	1	0.894508
VIP3-F2	0.013737	NA	0.772242	0.741801	0.0637816	0.51319	0.669035	0.0184979	NA	0.520884	0.856308	0.523357	0.479344	0.589515	0.0221321	NA	0.845024	0.218131	0.643617	0.664493	0.499116
FCA-F3	0.779076	NA	0.092864	0.105573	0.517205	0.650636	0.208668	0.567253	0.308068	0.0897922	0.493165	0.205523	0.43721	0.388407	0.584228	0.637618	0.290294	0.534619	0.115989	0.898342	0.133665
SVP-F5	0.168373	1	0.571265	0.741801	0.766558	0.0581823	0.965636	0.0833301	0.799525	0.82943	0.901661	0.911097	0.191854	0.781035	0.095389	0.799525	0.997566	0.80459	0.977928	0.0560478	0.996486
FTc2-F4	0.130996	1	0.0263557	0.741801	0.529533	1	0.688133	0.104941	0.450185	0.158389	0.683711	0.856818	0.537776	0.982352	0.0691286	0.450185	0.140872	0.306013	0.218064	0.776377	0.657336
CO-F1	0.00662082	NA	0.481537	0.225403	0.372777	0.134632	0.0271331	0.0383468	NA	0.655498	0.172779	0.257993	0.4083	0.00934807	0.0374832	NA	0.862297	0.145256	0.876051	0.158904	0.0117311
FRI-F1	0.138343	0.333333	NA	NA	NA	NA	NA	0.0925968	0.18169	NA	NA	NA	NA	NA	0.151036	0.18169	NA	NA	NA	NA	NA
SKIP1-F2	0.011046	0.333333	0.24607	NA	NA	NA	0.103538	0.00719351	0.18169	0.280011	NA	NA	NA	0.102301	0.0104962	0.18169	0.322475	NA	NA	NA	0.102495
TP288840	0.367173	NA	0.85463	0.741801	0.714341	0.701967	0.0716843	0.337224	NA	0.967114	0.907725	0.809487	0.682581	0.107598	0.0826215	NA	0.620416	0.219859	0.0877622	0.703764	0.125397
TP100150	0.154863	NA	0.57096	0.741801	0.56752	0.27545	1	0.343028	NA	0.698212	0.907725	0.974221	0.395431	0.294816	0.0266301	NA	0.398495	0.0314862	0.0501245	0.603517	0.653625
TP3177	0.943624	0.333333	0.15654	0.225403	0.317132	0.101205	0.688785	0.783175	0.581091	0.251302	0.735014	0.169362	0.739418	0.415545	0.342045	0.857945	0.175699	0.489895	0.0716812	0.606384	0.442704
TP360542	0.80492	0.333333	0.144117	NA	0.274235	0.86108	0.103538	0.803344	0.0138468	0.159433	0.295707	0.625988	0.695873	0.102301	0.290368	0.111367	0.120997	0.638196	0.192522	0.445274	0.102495
TP345457	0.0450327	NA	0.133957	NA	0.529488	0.101205	0.651341	0.0734644	0.18169	0.253591	0.373499	0.460052	0.506105	0.434271	0.278471	0.18169	0.586507	1	0.364969	0.760779	0.48189
TP11750	0.141922	0.333333	0.24607	NA	0.292896	0.554053	0.103538	0.124917	1	0.231354	0.373499	0.0931839	0.738443	0.102301	0.21449	0.799525	0.343087	0.201291	0.328802	0.850314	0.102495
TP402859	0.0277874	0.333333	0.827352	1	0.600637	0.270523	0.230048	0.00222918	0.559404	0.549263	0.457909	0.38068	0.335646	0.159521	0.00892648	0.559404	0.627958	0.493111	0.301737	0.542151	0.194359
SEP3-F1	0.174415	1	0.879439	0.741801	0.113969	0.22312	0.904423	0.00996511	0.361455	0.59705	0.349705	0.0731425	0.076992	0.610362	0.0529822	0.361455	0.86563	0.86719	0.73811	0.204261	0.684143
FTc1-F4	0.00120037	NA	0.377483	NA	0.491324	0.0513286	0.200352	3.92861e-05	NA	0.159433	0.490603	0.219744	0.0162053	0.410467	0.000277944	NA	0.0531083	0.328719	0.544393	0.00821969	0.334268
TP2488	0.289962	NA	0.035475	NA	0.380306	0.100108	0.0622509	0.198143	0.18169	0.0611692	0.13697	0.0888676	0.0531465	0.029	0.0649687	0.18169	0.120078	0.450098	0.00602229	0.244592	0.0389466
TP86766	0.764333	NA	0.962775	0.741801	0.0456313	0.0339201	0.724621	0.665564	1	0.59943	0.314632	0.00027894	0.0204865	0.558559	0.582937	0.559404	0.504971	0.882213	4.03048e-05	0.0029836	0.589709
TP47264	0.255163	1	0.297763	0.552786	0.206027	0.459002	0.28375	0.336123	0.637618	0.261235	0.0432774	0.759575	0.410461	0.141776	0.535093	0.637618	0.0291809	0.231886	0.510825	0.479532	0.289339
FRI31-F1	0.697588	1	0.0564841	0.683772	0.867746	0.613808	0.00308916	0.460895	0.559404	0.0877312	0.158948	0.316349	0.937515	0.0871007	0.7942	1	0.154882	0.72391	0.498822	0.751029	0.0159501
TP30473	0.292414	0.333333	0.0655583	0.552786	0.0438991	0.0741196	0.861759	0.0652739	0.21517	0.0575301	0.0735375	0.0191272	0.0341715	0.617413	0.0231497	0.0405193	0.0399346	0.607992	0.00266477	0.111168	0.542124
LD-F1	0.325011	0.333333	0.161588	1	0.726523	0.540924	0.716083	0.381719	0.21517	0.137391	0.400905	0.746107	0.818472	0.813247	0.0281978	0.0405193	0.00566548	0.793927	0.700357	0.170782	0.340671
ESD4-F7	0.146927	0.333333	0.951954	NA	NA	NA	NA	0.08455	0.308068	0.611796	NA	NA	NA	NA	0.0828421	0.0576689	0.584797	NA	NA	NA	NA
ESD4-F8	0.146927	0.333333	0.951954	NA	NA	NA	NA	0.0844716	0.21517	0.611796	NA	NA	NA	NA	0.0834694	0.0405193	0.584797	NA	NA	NA	NA
TFL1-FT6-F1	0.683126	1	0.920083	NA	0.177601	0.77416	0.669035	0.43725	0.559404	0.920375	0.88103	0.0979679	1	1	0.419874	1	0.873859	0.484362	0.152413	0.974138	0.686501
TFL1-FT4-F2	0.493913	1	0.901496	NA	0.564549	0.86108	0.904423	0.413304	0.559404	0.808364	0.87227	0.455139	1	0.691183	0.379966	1	0.932376	0.464659	0.397085	0.63551	0.531121
FKF-F2M	0.904862	0.333333	0.198478	NA	0.518368	0.376136	NA	0.731456	0.18169	0.120553	NA	0.332732	0.36275	NA	0.785715	0.18169	0.119091	NA	0.331761	0.26211	NA
ELF1-F1	0.133446	0.333333	0.98003	NA	0.714341	NA	0.268142	0.0184832	0.111367	0.943303	0.516848	0.881647	NA	0.0828075	0.0287234	0.0138468	0.891173	0.530941	0.599204	NA	0.291383
ELF3-F1	0.326227	1	0.548104	0.741801	0.305856	0.123847	0.386759	0.209731	0.637618	0.745724	0.888407	0.146059	0.183745	0.0149235	0.144679	0.308068	0.570526	0.977972	0.180815	0.293699	0.11805
FPA-F5	0.360899	0.333333	0.425467	NA	0.411037	0.941805	0.1947	0.320042	1	0.149075	0.626813	0.411658	0.735762	0.58034	0.58451	0.637618	0.158354	0.949593	0.38173	0.95343	0.151848
NA - correlation was not calculated due to the lack of marker polymorphism in the particular group

## Sheet: TableS8
Quantitative control of early flowering in white lupin (Lupinus albus L.)
Sandra Rychel-Bielska, Anna Surma, Wojciech Bielski, Bartosz Kozak, Renata Galek, and Michał Książkiewicz
Supplementary Table S8. P-values of Chi-square test of differences in allele frequencies between subpopulations
Group	V1_V4	V1_V5	V1_V6	V2_V3	V2_V4	V2_V5	V2_V6
ELF4-F1	1	1	0.821789	0.632129	0.795352	0.929004	0.515994
PIF4-F1	0.279372	0.414073	0.00194803	0.68885	0.307372	0.244737	5.12e-10
FY-F6	0.217689	0.0758893	0.411747	0.00496972	3.17053e-05	3.18761e-06	0.0604235
TP23903	0.0640581	0.0275412	0.419328	0.138194	8.32468e-11	6.70167e-10	2.85e-05
GI-F1	0.000103359	0.00240908	0.254659	0.00287816	0.00127417	0.0066622	0.340173
TP222136	0.197907	0.246242	0.400448	2.8954e-05	0.896135	0.964467	1
TP272531	0.000431729	0.000450833	0.0242596	0.69744	0.0911328	0.0752707	0.338688
TP47110	0.00232007	0.010283	0.00554266	1	1	1	0.72522
TP56963	0.877981	0.807438	0.165024	0.0197444	0.0490208	0.771985	0.117601
TP235608	0.590831	0.0538061	0.912409	2.4571e-05	0.000109143	1.58119e-06	0.644123
TP94353	0.0865118	0.0828657	0.354442	0.00900628	0.00330566	0.00487524	0.300047
FTa1-F2	0.136966	0.279257	0.483578	1	0.784847	0.987232	1
TP115697	0.901519	0.869607	1	0.982346	0.312685	0.311527	0.451816
TP278885	1	1	0.483578	1	0.126164	0.0651611	1
TP114357	0.523091	0.0046059	0.419328	0.347619	0.242833	0.166432	0.700379
FLD-F1	0.00941296	0.00017333	0.00310216	0.477822	0.111169	0.00605758	0.0279111
PIF4-F6	0.510275	0.872124	0.0833042	1	0.295892	0.0950488	4.67e-08
MFTa1-F1	0.769245	0.8797	0.286977	0.306973	0.109761	0.388235	0.322918
MFT-FT3-F1	0.0747813	0.00891778	0.272443	0.113781	0.001514	0.00102978	0.329444
SPL6-F3	0.539275	0.194144	0.697529	0.0143691	0.45953	0.812911	0.550146
VIP3-F2	0.077812	0.0144136	1	0.000895065	0.000392938	8.64821e-06	1
FCA-F3	0.756497	0.345767	0.29704	0.000183587	0.272498	4.33483e-05	0.382255
SVP-F5	0.000673487	0.14911	0.978234	0.570487	0.00179648	0.138527	0.424583
FTc2-F4	0.505523	0.025726	0.589696	0.187564	0.341281	0.0339483	0.406804
CO-F1	0.0926353	0.0636326	0.247197	0.00637181	0.3684	0.56928	0.00446507
FRI-F1	0.136966	0.279257	0.483578	NA	NA	NA	NA
SKIP1-F2	0.136966	0.279257	0.906855	1	0.784847	0.987232	1
TP288840	6.27103e-05	0.000650929	0.00106758	0.449725	0.0152809	0.075104	0.0829864
TP100150	0.000149961	0.00152158	0.0328416	0.840251	0.0131252	0.083612	0.770529
TP3177	0.000448082	0.00606395	0.0379642	0.0416756	0.655431	0.32366	0.130677
TP360542	0.010226	0.00202864	0.0138195	0.177743	0.503234	0.397311	0.524458
TP345457	0.000500543	0.00017333	0.104736	0.347619	0.103352	0.177721	0.832205
TP11750	0.0159188	0.0678397	0.0138195	1	0.556603	0.4226	1
TP402859	0.00760167	0.000450833	0.253044	0.000390778	1.59238e-07	4.24468e-08	0.0126595
SEP3-F1	1.78819e-05	0.000721433	0.0182091	0.0304614	5.99715e-05	0.00170968	0.077663
FTc1-F4	0.54789	0.0958084	0.597928	1	0.43181	0.00219649	0.0842855
TP2488	0.890643	0.11082	1	0.0103349	0.619564	0.0590597	0.49417
TP86766	0.890643	0.0790893	0.176282	0.152811	1	0.00818296	0.0700421
TP47264	0.899471	0.412287	0.351357	0.0436828	0.528725	0.014604	0.0155994
FRI31-F1	0.918406	0.111568	0.576259	0.0364274	0.300149	6.68955e-06	0.411472
TP30473	0.0988363	0.210135	0.305083	0.252127	0.62479	0.235446	0.0186525
LD-F1	0.279508	0.891905	0.305083	0.304513	0.19019	0.798634	0.258164
ESD4-F7	0.000664387	0.00891778	0.0559913	1	0.784847	0.987232	1
ESD4-F8	1.70635e-05	0.00115262	0.0193927	1	0.784847	0.987232	1
TFL1-FT6-F1	0.283507	0.000865252	0.123002	0.255933	0.0127433	2.02614e-06	0.136804
TFL1-FT4-F2	1	0.00171324	1	0.205961	0.08011	2.1571e-06	0.531433
FKF-F2M	0.610128	0.625159	0.483578	1	1	1	1
ELF1-F1	0.000432448	2.90335e-05	0.111524	0.884748	0.160856	0.110308	0.522661
ELF3-F1	0.848115	0.286277	0.0616021	0.0121148	8.40129e-05	0.0560773	0.845092
FPA-F5	0.724457	0.378397	0.469199	0.0833356	0.0468689	0.00126289	0.00728489
NA - correlation was not calculated due to the lack of marker polymorphism in the particular group

## Sheet: TableS9
Quantitative control of early flowering in white lupin (Lupinus albus L.)
Sandra Rychel-Bielska, Anna Surma, Wojciech Bielski, Bartosz Kozak, Renata Galek, and Michał Książkiewicz
Supplementary Table S9. Meteorological conditions recorded by the nearby localized meteorological station (Poznań-Ławica, 5.1 km) and theoretical photoperiod hours calculated for this latitude (covering 100 days from sowing date).
Day from sowing	Date	Mean temperature	Max temperature	Min temperature	Humidity	Cloud cover	Wind speed	Sun hours	Photoperiod
1	2015-04-10	10.5	18.7	0.6	61.1	1.9	1	11.9	13:34:23
2	2015-04-11	14	21.7	3.6	54.4	3	2.4	9.1	13:38:24
3	2015-04-12	10.7	18.9	6.4	50.9	5.8	4.8	8.5	13:42:24
4	2015-04-13	8.6	11.5	7	52.4	5.6	7	5.4	13:46:24
5	2015-04-14	7.3	11.4	1.4	56.1	5.6	5.5	2.9	13:50:23
6	2015-04-15	14.5	20.4	9.9	56.1	4.5	5.1	5.7	13:54:21
7	2015-04-16	10.7	17.6	8.4	51.1	2.1	5	12	13:58:19
8	2015-04-17	7	11.9	2.3	62.1	3.8	4	11.6	14:02:16
9	2015-04-18	4.8	9.6	-0.2	66	4.4	4.5	6.8	14:06:12
10	2015-04-19	7.6	14	0	54.3	4.3	4.3	10.7	14:10:08
11	2015-04-20	9.6	16.8	3.6	52.1	3.3	6	13.2	14:14:02
12	2015-04-21	11.2	20.5	2.5	48.6	0.4	4.6	13.9	14:17:56
13	2015-04-22	9.4	16	0	55.4	1.6	2	13.7	14:21:48
14	2015-04-23	12.2	19.6	3.7	53.3	1.4	3.8	13.2	14:25:40
15	2015-04-24	13.4	20.1	4.8	53.9	2.6	1.8	13	14:29:30
16	2015-04-25	15.8	22.5	5.1	46.3	4.5	2.5	9.2	14:33:19
17	2015-04-26	16.5	20.4	13.1	56.1	5.5	2.6	8.1	14:37:07
18	2015-04-27	16.5	24.5	7.6	67.1	4	4	9.6	14:40:53
19	2015-04-28	7.5	18.2	3.1	89.3	7.9	5.5	0	14:44:39
20	2015-04-29	7.3	12.8	2.6	68.3	4.1	3.1	9.2	14:48:22
21	2015-04-30	10.5	15.5	4.8	51.1	5.4	3.1	7.5	14:52:05
22	2015-05-01	9.5	14.3	6.9	67.5	5.1	2.5	7.4	14:55:45
23	2015-05-02	8.8	14.6	0.7	60.6	2.9	2.8	12	14:59:24
24	2015-05-03	11.6	18.3	0.7	50.9	3.4	2.9	13.1	15:03:02
25	2015-05-04	14.9	21	9.9	72.3	5.9	3.1	4.5	15:06:37
26	2015-05-05	19.2	25.5	10.5	68.1	6.5	3.8	3.4	15:10:11
27	2015-05-06	16.5	23.1	14.5	70.3	6.6	2.3	4.1	15:13:42
28	2015-05-07	14.1	19.6	9.8	57.9	3.3	4.1	12.5	15:17:12
29	2015-05-08	12.6	18.7	3.4	61.5	4.1	0.9	9	15:20:39
30	2015-05-09	14.7	21.5	7.9	67.1	5.6	3.1	5.9	15:24:05
31	2015-05-10	11.4	15.8	9.9	80.6	7.4	5.4	4.4	15:27:27
32	2015-05-11	12.4	18.4	4.1	58.6	4.6	1.5	11.6	15:30:48
33	2015-05-12	17.3	24.3	8.3	51.3	7.1	4.5	6.9	15:34:06
34	2015-05-13	12.8	21.6	7.4	63.4	3.9	4.9	11.9	15:37:21
35	2015-05-14	10.6	15.8	6.7	67.9	5.8	4.1	7	15:40:33
36	2015-05-15	11.6	17.7	6.2	65.5	3.1	3.5	13.9	15:43:43
37	2015-05-16	11.8	18	2.4	59.9	5.1	3.3	7	15:46:50
38	2015-05-17	11.3	14.5	8.7	62.1	5.5	5.5	7.6	15:49:53
39	2015-05-18	13.7	19.3	6.4	53.1	6	2.6	9.6	15:52:53
40	2015-05-19	17.6	22.9	11	53.5	6.6	3.5	7.7	15:55:50
41	2015-05-20	12.9	19.4	11.7	80.3	7	2.3	0	15:58:44
42	2015-05-21	11.3	17.1	5.8	81.9	6.5	1.6	2.5	16:01:34
43	2015-05-22	13.2	19.2	4.6	56.6	3.3	1.3	13	16:04:20
44	2015-05-23	14.7	20.6	5.4	57.9	5.4	1.6	4.2	16:07:02
45	2015-05-24	14.8	20.9	8.7	56.1	3.4	2	11.5	16:09:41
46	2015-05-25	16.3	23.2	7.1	59.4	3.9	2.1	10.6	16:12:15
47	2015-05-26	14.1	19.4	10.6	59.3	5.6	5.4	7.5	16:14:45
48	2015-05-27	10.8	14.6	6.6	64.4	5.1	5.1	5.1	16:17:11
49	2015-05-28	14.3	19.8	6.9	49.4	4.1	3.3	13.2	16:19:32
50	2015-05-29	15.3	20.4	9.8	60.1	4.9	2.5	11.6	16:21:49
51	2015-05-30	14.6	19.1	13	57.6	5.3	5.1	10.6	16:24:01
52	2015-05-31	14.3	20.2	5.8	49.3	3.6	3.5	11.4	16:26:08
53	2015-06-01	17.3	23.3	12.9	65	5.8	3.9	5.4	16:28:10
54	2015-06-02	18.4	25.1	10.7	60.6	4.8	4.4	11.5	16:30:08
55	2015-06-03	21.5	29.1	17.2	49.3	2.8	5.6	13.4	16:32:00
56	2015-06-04	16	21.9	9.1	48.3	0.5	3.3	15.9	16:33:47
57	2015-06-05	19.2	26.3	9.3	37.8	0.9	2.9	16.1	16:35:28
58	2015-06-06	24.1	31.9	14.8	36.8	2.9	3.1	15.2	16:37:04
59	2015-06-07	14.4	30.1	12.5	78.9	6.1	2.8	1.2	16:38:34
60	2015-06-08	15.3	20.9	9	66.5	6.8	2.5	7.3	16:39:59
61	2015-06-09	11.6	15.7	9.2	82.6	6.8	3.3	1.9	16:41:18
62	2015-06-10	15	21.2	7.9	62	2.3	1.4	13.6	16:42:31
63	2015-06-11	16.6	22.8	8.7	48	1	0.6	16	16:43:38
64	2015-06-12	17.3	24.2	12.1	73.8	4.9	2.1	6	16:44:39
65	2015-06-13	20.2	27.5	11.8	69.5	5.8	1.1	9.8	16:45:34
66	2015-06-14	21.2	26.1	17.8	65	5	4.4	13.9	16:46:23
67	2015-06-15	16	22.6	13.5	59.6	3.5	4	13.4	16:47:06
68	2015-06-16	13	17.3	7.3	57.8	5.8	2.8	4.1	16:47:42
69	2015-06-17	15.3	20.5	8.4	52.6	5	2.6	14.4	16:48:13
70	2015-06-18	15.1	19.4	12	73	7.8	3.8	1.9	16:48:36
71	2015-06-19	12.2	18	10.8	77.3	6.8	3.3	5.2	16:48:54
72	2015-06-20	13	17.9	9	78.4	6.3	2.8	6	16:49:05
73	2015-06-21	13.1	16.9	9.5	78	6.4	3.3	3.9	16:49:10
74	2015-06-22	13.7	18.3	7.6	79.6	6	2.1	3.4	16:49:08
75	2015-06-23	12.2	15.7	11.6	88.9	7.6	4.5	1.5	16:49:00
76	2015-06-24	12.6	15.8	9	80	6.3	4.1	2.3	16:48:45
77	2015-06-25	15.4	20.3	9.9	70.4	5.8	2.8	5.9	16:48:25
78	2015-06-26	16.8	22.4	10.7	73.8	5.5	1.4	2.7	16:47:58
79	2015-06-27	17.7	22.9	13.6	79.8	7.3	1.6	3.9	16:47:24
80	2015-06-28	15.7	17.5	15.3	89.6	7.4	3.8	0.1	16:46:44
81	2015-06-29	16.4	22	9.9	75.6	5.1	1.3	5.2	16:45:59
82	2015-06-30	19.5	24.9	14.1	62.9	5.1	2.8	11.6	16:45:07
83	2015-07-01	19.2	24.9	11.1	54.9	1.1	2	16.1	16:44:09
84	2015-07-02	21.1	27.8	14.2	52.5	0.1	3.9	16	16:43:05
85	2015-07-03	23.4	29.9	14.7	42.9	0.4	3.3	16	16:41:55
86	2015-07-04	25.7	33	17.4	43.9	1.5	2	15.7	16:40:39
87	2015-07-05	27.1	33.9	19	44.5	5.4	2.4	7.2	16:39:17
88	2015-07-06	23	30.5	20	56.8	5.4	4	8.5	16:37:50
89	2015-07-07	23.6	31.4	12.7	45.6	1	2.4	15.7	16:36:17
90	2015-07-08	20.2	30.2	17.9	71.4	6.3	4.5	8	16:34:39
91	2015-07-09	15.7	20	13.3	62.9	4.6	6	8.4	16:32:55
92	2015-07-10	13.4	16.7	10.5	55.9	6	6	4.4	16:31:06
93	2015-07-11	16	22.3	8.3	52.5	2.5	2.9	14.3	16:29:12
94	2015-07-12	17.9	24.7	11.4	62	6.9	1.1	6.3	16:27:13
95	2015-07-13	16.9	20.7	15.4	86	7.4	4.5	2.2	16:25:09
96	2015-07-14	17.3	21	15	78.9	6.8	2.5	5.2	16:23:00
97	2015-07-15	18.6	23.2	14.9	68.3	5.3	3.3	10.8	16:20:46
98	2015-07-16	19	25.4	11.3	66.6	3.5	1.5	8.8	16:18:28
99	2015-07-17	22.7	28.5	14.3	59.3	2.6	1.4	11.5	16:16:06
100	2015-07-18	25.8	32.5	19.8	54.6	3.9	3.8	12.8	16:13:39
1	2018-03-22	1	2.9	-0.6	75.5	7.9	4.1	0	12:18:04
2	2018-03-23	1.8	2.6	1	95.1	8	2.1	0	12:22:11
3	2018-03-24	3.9	7.6	0.6	76.1	7	2.4	2.1	12:26:17
4	2018-03-25	5.2	11.4	-2.1	62.9	2.8	2.4	10	12:30:23
5	2018-03-26	4.1	10.6	0.2	76.6	4.9	3.5	3.9	12:34:29
6	2018-03-27	1.8	4.3	1	82.4	7	3	0.1	12:38:35
7	2018-03-28	0.5	2.9	-3.3	84	7.4	6	0	12:42:41
8	2018-03-29	4.4	7.1	1.5	77.6	7.8	5.6	0	12:46:46
9	2018-03-30	4.3	9.8	0.5	69.5	2.9	3.5	9.1	12:50:52
10	2018-03-31	4.3	7.8	0.3	81.3	7.1	6.5	0	12:54:57
11	2018-04-01	3.1	6.8	1.4	86.6	7.9	8.1	0	12:59:01
12	2018-04-02	3.7	9	0.8	66	5.3	6.6	9.7	13:03:06
13	2018-04-03	9.2	17.5	0.5	66.8	6	3.8	4.9	13:07:10
14	2018-04-04	15.2	21.9	6.6	55	6.4	3	9	13:11:14
15	2018-04-05	12.8	17.8	9.8	64.9	5.5	5	8.9	13:15:17
16	2018-04-06	7.2	12.1	1.8	56	1.9	4.4	12.3	13:19:20
17	2018-04-07	10.3	17.6	0.8	45.4	1.4	4.9	12.1	13:23:23
18	2018-04-08	14.5	21.9	8.7	59.5	2.3	4.5	11.1	13:27:25
19	2018-04-09	13.7	20.8	7.9	70.1	1	1.9	10	13:31:27
20	2018-04-10	16.7	24	10.5	57.3	2.5	4.9	11.3	13:35:28
21	2018-04-11	13.1	17.8	9.3	76.1	7	5.8	2.8	13:39:29
22	2018-04-12	15.1	21	8.5	69.9	5.3	6.5	7.6	13:43:29
23	2018-04-13	17.1	22.1	12.9	64.1	4.1	5.8	9.4	13:47:29
24	2018-04-14	14.2	19.5	10.1	62	3.6	4.5	7.8	13:51:27
25	2018-04-15	16.5	23.4	7.9	58.4	5.4	3.1	6	13:55:26
26	2018-04-16	15.2	20.2	13.4	83.5	8	3.1	0	13:59:23
27	2018-04-17	12.7	18.1	9	76.1	4.9	4.8	9.2	14:03:20
28	2018-04-18	13.7	20.9	4.6	64.5	0.6	2	12.5	14:07:16
29	2018-04-19	16.5	23.5	8.4	66.3	1.1	3.1	14.3	14:11:11
30	2018-04-20	17.7	23.6	10.8	52	1.5	3.3	13.6	14:15:05
31	2018-04-21	16.4	22.1	10.9	52.5	2	4.5	13.3	14:18:59
32	2018-04-22	13.1	19.7	3.5	55	3	1.8	13.4	14:22:51
33	2018-04-23	15.6	22.1	10.4	67.1	6.3	4.4	8	14:26:42
34	2018-04-24	12.9	17.7	10.4	78.8	6.4	4.1	4.7	14:30:32
35	2018-04-25	13.2	20.1	9.7	72.8	6.3	5.8	6.3	14:34:21
36	2018-04-26	9.1	14.6	4.9	79.4	3.3	4	9.8	14:38:08
37	2018-04-27	10.1	15.5	4.1	66.6	3.9	2.9	9	14:41:54
38	2018-04-28	15.7	22.5	7.6	53.4	4.3	3.1	11.4	14:45:39
39	2018-04-29	18.7	24.8	10.8	62.5	3.6	3.5	12.9	14:49:22
40	2018-04-30	19.7	28.3	12.7	52.6	2.9	5.9	11.4	14:53:04
41	2018-05-01	14.5	20.5	7.1	56.5	3.6	3.3	11.4	14:56:44
42	2018-05-02	11.8	16.7	4.4	62.3	5.5	2.9	1.9	15:00:23
43	2018-05-03	15.7	20.3	12.3	75.6	6	4.5	5.8	15:04:00
44	2018-05-04	12.7	17.7	7	55.3	1.6	4.5	13.7	15:07:35
45	2018-05-05	12.5	19.2	3.1	50.8	2.6	3.6	14.1	15:11:08
46	2018-05-06	13.9	20.5	5.9	52.4	0.9	2.9	13.9	15:14:39
47	2018-05-07	16.6	23.3	7.3	54.3	0	2.8	14.7	15:18:08
48	2018-05-08	18.9	25.2	10.6	47.5	0.1	4.4	14.7	15:21:35
49	2018-05-09	20.8	27.2	13	48.3	1.8	3.9	14.3	15:25:00
50	2018-05-10	20.4	26.7	14.8	68.1	5.1	4.1	10.9	15:28:22
51	2018-05-11	17.5	20.7	15.6	82	6.6	2.5	2.3	15:31:42
52	2018-05-12	18.2	24.1	13.1	79.3	5.3	2.6	5.3	15:34:59
53	2018-05-13	19.2	24.9	11.2	47.1	1.3	4.9	15	15:38:13
54	2018-05-14	18.1	22.2	14.9	45	3.9	5.5	13.1	15:41:25
55	2018-05-15	16	20.3	11.8	58.5	6.1	4.5	8.5	15:44:34
56	2018-05-16	17.7	21.9	14.5	61.5	7.5	3.9	3.3	15:47:40
57	2018-05-17	15.3	18.2	13.3	79.6	7	4.5	0.1	15:50:42
58	2018-05-18	15.8	22.3	10.6	69.1	4.8	6.3	10.9	15:53:42
59	2018-05-19	14.4	20.5	7	47	1.1	4.1	15.2	15:56:38
60	2018-05-20	15.4	21.5	5.6	41.8	1.6	3.5	15.5	15:59:30
61	2018-05-21	16.8	22.5	9.9	46.4	1.1	4.8	14.7	16:02:19
62	2018-05-22	17	23.7	9.7	49.1	2.9	2.3	12	16:05:05
63	2018-05-23	18.6	25.6	8.8	49.8	2.1	3.3	13.7	16:07:46
64	2018-05-24	19.4	25	12.8	50.4	2.3	6	14.9	16:10:23
65	2018-05-25	18.6	26.4	12.9	54	2.8	4.5	11.9	16:12:56
66	2018-05-26	20.1	27.9	10.2	55.8	2.8	2.3	12.3	16:15:25
67	2018-05-27	22.1	28.1	14.5	60.6	4	3.9	11.3	16:17:50
68	2018-05-28	24.2	30	16.1	48.5	3	5.3	15.2	16:20:10
69	2018-05-29	24.2	29.8	16	37.3	0.3	5	15.7	16:22:25
70	2018-05-30	23.5	29.7	17.3	50.8	3.8	3.5	10.1	16:24:36
71	2018-05-31	24.9	31.2	16.1	47.8	1.8	2.3	14	16:26:42
72	2018-06-01	23.4	31.3	17.9	59.1	4.1	2.8	5.7	16:28:43
73	2018-06-02	22.1	29.7	17.2	68.9	5.4	3.6	7.9	16:30:39
74	2018-06-03	22.8	29	17.7	61.8	3.9	3.5	11.5	16:32:29
75	2018-06-04	22	28	15	58.8	1.5	3.9	15.2	16:34:15
76	2018-06-05	19.7	25.4	15.2	62.9	3.1	5.3	13.7	16:35:55
77	2018-06-06	15.2	23.1	9	37.5	0.9	5.5	16.2	16:37:29
78	2018-06-07	17.8	23.9	8.9	34.9	1.1	4.3	15.8	16:38:58
79	2018-06-08	22.5	30	12.4	38	0.5	3.3	15.6	16:40:21
80	2018-06-09	24.7	30.6	16.3	34.6	5	4.1	14.8	16:41:39
81	2018-06-10	23	29.7	19	57	6.9	2.9	3	16:42:50
82	2018-06-11	20.4	26	16.5	71	5.9	4.3	8.5	16:43:56
83	2018-06-12	17.5	23.6	13.3	62.4	3.1	4.1	13.3	16:44:55
84	2018-06-13	16.1	20.8	11.7	70.5	6.5	3.6	0	16:45:49
85	2018-06-14	17.4	22	13.9	60.9	5	3.4	7.7	16:46:36
86	2018-06-15	18.8	24.9	11	53.5	5.9	1.6	7.2	16:47:17
87	2018-06-16	20.8	26.7	16.3	49.9	5.3	1.6	5	16:47:52
88	2018-06-17	23.9	30.1	17.2	43.5	5.9	3.4	11.4	16:48:20
89	2018-06-18	20.1	25.8	15.9	63.8	5.8	3	5.9	16:48:42
90	2018-06-19	21.5	25.9	17.7	54.4	5.8	4.5	6.4	16:48:58
91	2018-06-20	21.8	27.5	15	56.5	2.1	2.6	12.5	16:49:07
92	2018-06-21	20.8	31.3	14.4	53.9	4.5	6.3	10.9	16:49:10
93	2018-06-22	13.2	17.6	9.4	59.8	4.3	5.4	8.1	16:49:07
94	2018-06-23	13.8	18.8	9.6	65.1	7	5.1	2.8	16:48:57
95	2018-06-24	13.4	18.9	11.3	82.5	6.6	4.5	2.9	16:48:41
96	2018-06-25	15	22.4	10.2	79.9	6.8	4	4.3	16:48:18
97	2018-06-26	16.2	22.4	12.3	79.9	6	3	6.7	16:47:50
98	2018-06-27	18.9	25.3	10.9	64.1	4.3	3.8	11.5	16:47:14
99	2018-06-28	21.8	27.1	16.3	56.3	5.8	4.9	3.6	16:46:33
100	2018-06-29	21.5	28.9	16.5	50.6	2.8	5.8	12.9	16:45:46
1	2020-03-19	9.8	14.9	6.7	76.5	7	3.1	-	12:07:52
2	2020-03-20	7.2	10.5	5.1	66.9	7.5	2.6	-	12:11:59
3	2020-03-21	3.2	7.7	0.8	60.3	5	5.5	-	12:16:06
4	2020-03-22	0.3	4	-3.1	54.6	1.5	5.3	-	12:20:12
5	2020-03-23	-0.1	5	-5.3	47.8	0.1	3.4	-	12:24:19
6	2020-03-24	0.5	6.9	-6.7	46.6	0.3	3.1	-	12:28:25
7	2020-03-25	3.1	8.8	-3.5	36.9	0.4	5.3	-	12:32:31
8	2020-03-26	5.1	10.4	-1.6	39	4	4.4	-	12:36:37
9	2020-03-27	7.8	13.7	2.3	45.3	4.4	3.3	-	12:40:43
10	2020-03-28	9	17.2	0.7	48.3	1.6	2.6	-	12:44:49
11	2020-03-29	3.6	10.4	2.4	68.8	6.6	6.3	-	12:48:55
12	2020-03-30	1	6.4	-5.7	62.4	3.6	5	-	12:53:00
13	2020-03-31	0.9	4.1	-1.1	64	4.4	3.8	-	12:57:05
14	2020-04-01	3.1	9.2	-3.9	52.9	1.6	4.3	-	13:01:09
15	2020-04-02	5.3	8.7	2.2	53.8	5.6	4.1	-	13:05:14
16	2020-04-03	6.5	10.7	2.4	52.8	5.3	5.9	-	13:09:18
17	2020-04-04	5.3	11.6	-2.5	58.4	2.9	2.6	-	13:13:22
18	2020-04-05	7.5	14.7	-2.5	47.1	0.5	3.6	-	13:17:25
19	2020-04-06	13.1	21.2	4.7	33.1	0	4.6	-	13:21:28
20	2020-04-07	14.5	22.6	8.1	40.9	0.1	3.9	-	13:25:30
21	2020-04-08	11.8	20.2	1.2	53.6	0.6	1.8	-	13:29:32
22	2020-04-09	11.4	19.5	3.7	58.3	2.5	4.4	-	13:33:33
23	2020-04-10	7.6	14.4	0.7	51.8	2	3	-	13:37:34
24	2020-04-11	8.9	15.2	-0.2	43.3	2.1	1.9	-	13:41:34
25	2020-04-12	13.2	21.8	3.1	39.1	1.8	2.9	-	13:45:34
26	2020-04-13	7.7	19.2	5.1	59	4.6	5.5	-	13:49:33
27	2020-04-14	4.2	9.3	-1.1	55	3.4	6.1	-	13:53:32
28	2020-04-15	7.5	12.5	1.7	55.6	5.6	6.1	-	13:57:30
29	2020-04-16	11.1	17.4	4.5	52.4	4.4	5.3	-	14:01:27
30	2020-04-17	10.1	15.4	2.3	46.8	2	3.1	-	14:05:23
31	2020-04-18	9.2	15.5	0.7	32.6	3.3	3.5	-	14:09:19
32	2020-04-19	7.8	12.5	3.1	45	1.9	4.6	-	14:13:13
33	2020-04-20	7.8	14.1	0	53.4	0.5	4.1	-	14:17:07
34	2020-04-21	9.9	16.1	2.6	48.6	0.1	4.8	-	14:21:00
35	2020-04-22	10.7	17.7	2.4	53.4	0.8	3.4	-	14:24:51
36	2020-04-23	12.9	20.5	2.6	46.1	1.5	1.5	-	14:28:42
37	2020-04-24	14.1	22.2	3.9	46.4	5.3	2.9	-	14:32:32
38	2020-04-25	9.9	17.7	6.7	54.5	6.8	5.4	-	14:36:20
39	2020-04-26	10.1	15.1	4.3	51.3	4.5	3.1	-	14:40:07
40	2020-04-27	12.8	21.2	3.3	46.4	2.8	2.4	-	14:43:52
41	2020-04-28	16.4	24.7	6.1	43.4	4.3	2.9	-	14:47:37
42	2020-04-29	10.9	20	9.2	65.1	7.8	4.5	-	14:51:19
43	2020-04-30	13.7	19.6	7	65.5	7.6	3.9	-	14:55:00
44	2020-05-01	13.3	17.3	10.9	78.3	6.1	3	-	14:58:40
45	2020-05-02	11.2	16.8	6.9	71.6	5.4	3.4	-	15:02:18
46	2020-05-03	10.6	15.1	7.7	74.4	5.1	4.6	-	15:05:54
47	2020-05-04	10.1	16.3	3.5	74.1	6	2.5	-	15:09:28
48	2020-05-05	7.7	11.8	3.6	70.5	3.6	5.5	-	15:13:00
49	2020-05-06	11	17.4	5.1	60.1	5.6	7.3	-	15:16:30
50	2020-05-07	10.9	16	6.1	62.3	4.1	5.6	-	15:19:57
51	2020-05-08	13.7	21	5.7	52.4	3.3	3.9	14	15:23:23
52	2020-05-09	15	22.5	4.6	51.4	2.5	1.8	14.7	15:26:46
53	2020-05-10	18	24.1	9	52.6	4.1	3.8	9.4	15:30:07
54	2020-05-11	10	21.1	3.6	89.6	7.6	5.9	0	15:33:25
55	2020-05-12	6.7	11.9	0.8	64.8	3.8	4.6	10.2	15:36:41
56	2020-05-13	8.7	13.9	3.1	59.5	5.5	3.5	7.4	15:39:54
57	2020-05-14	9.6	14.3	3.3	59.5	3.6	3.8	10.5	15:43:04
58	2020-05-15	9.3	16	0.2	51.9	0.6	2.9	14.3	15:46:12
59	2020-05-16	11.2	15.8	8.3	53.4	6	4.8	5.4	15:49:16
60	2020-05-17	12.3	17.8	5.8	53.6	4.6	4.8	10.8	15:52:17
61	2020-05-18	14.8	18.4	10.1	53.9	7.4	4.6	4.9	15:55:14
62	2020-05-19	13.9	17.8	12.1	72.6	6	3.5	1.8	15:58:09
63	2020-05-20	12.3	18.1	5	59.8	2.9	3.1	12.8	16:00:59
64	2020-05-21	12.5	17.5	7.7	45.6	2.6	3.3	14.7	16:03:46
65	2020-05-22	13	17.9	7	36.6	6.6	3.6	7.6	16:06:30
66	2020-05-23	12	15.1	9.6	73.4	8	3.1	0	16:09:09
67	2020-05-24	12.2	17.6	8.7	75.5	6	4.9	7.5	16:11:44
68	2020-05-25	12	15.8	9.1	82.8	7	4	4.1	16:14:15
69	2020-05-26	12.3	17.4	8.5	74.9	5.1	3.3	8.3	16:16:42
70	2020-05-27	14.6	21	6.8	60.6	3	2.3	13.4	16:19:04
71	2020-05-28	13	19	10.1	74.3	6.6	4.3	1.5	16:21:22
72	2020-05-29	12.6	19	6	54.1	2.6	4.8	11.7	16:23:35
73	2020-05-30	12.6	18.9	5.5	58.4	3.5	4.8	11.9	16:25:44
74	2020-05-31	16.1	23.2	9.3	54.3	3.3	6.8	10.6	16:27:47
75	2020-06-01	16.7	22.2	9.6	47.1	0.6	5.1	15.6	16:29:45
76	2020-06-02	14.7	21.8	10.4	69.8	4.8	3.4	7.6	16:31:38
77	2020-06-03	15.2	20.7	6	50.6	2.3	3	15.1	16:33:26
78	2020-06-04	17.7	22.7	8.8	46.1	5.6	4.4	11.9	16:35:09
79	2020-06-05	14.9	21.1	13.4	84	7.5	3.1	2.9	16:36:46
80	2020-06-06	14.2	17.4	10.9	69.4	4.6	5.1	7.3	16:38:18
81	2020-06-07	16.2	20.1	11.4	77.6	7	1.8	0.5	16:39:43
82	2020-06-08	15.1	18.1	12.3	79	7.4	3.4	0.5	16:41:04
83	2020-06-09	16.5	21.5	11	66.8	3.6	3.4	14	16:42:18
84	2020-06-10	14.5	19.2	9.3	80.1	5.3	3	3.9	16:43:26
85	2020-06-11	19.5	23.9	16	80	6.5	2.9	2.9	16:44:29
86	2020-06-12	22.4	27.4	15.6	74	4	3	9.8	16:45:25
87	2020-06-13	25.1	30.8	20.3	66	2.4	5.3	11.9	16:46:15
88	2020-06-14	20.1	26.4	16.3	60.5	3.8	5.1	13.7	16:46:59
89	2020-06-15	17.6	22.4	11.7	62.1	3.4	3.6	9.8	16:47:37
90	2020-06-16	20	26.1	11.6	55.3	3.1	1.5	11.7	16:48:08
91	2020-06-17	22.2	27.7	13	53.3	2.8	3.3	14.1	16:48:34
92	2020-06-18	20.6	26.7	17.1	77.5	6.6	2.9	4.5	16:48:52
93	2020-06-19	18.1	19.4	17.2	91.1	7.8	4	0	16:49:05
94	2020-06-20	18.2	21.4	16.6	87.3	7.8	5.4	0	16:49:11
95	2020-06-21	18.4	21.5	16.5	89.8	7.8	5.1	0.3	16:49:11
96	2020-06-22	19.8	25.9	16.4	71.3	6.1	5.8	7.2	16:49:04
97	2020-06-23	16.6	22	12.3	73.3	3.4	4	8.9	16:48:51
98	2020-06-24	16.9	22.8	11	84.3	6.9	3	0	16:48:31
99	2020-06-25	21.1	25.1	18.1	76.4	6.8	3.4	7.1	16:48:06
100	2020-06-26	20.5	28.3	17.6	79.6	4.6	4.5	8.2	16:47:33

## Sheet: FigureS1
Quantitative control of early flowering in white lupin (Lupinus albus L.)
Sandra Rychel-Bielska, Anna Surma, Wojciech Bielski, Bartosz Kozak, Renata Galek, and Michał Książkiewicz
Supplementary Figure S1. Orientation of greenhouses and arrangement of tables in plant phenotyping experiments.
Tables carrying pots with analyzed plants are marked by grey boxes. Greenhouse chamber length was 25 m in 2015 and 18 m in 2018 and 2020.
